# Supplementary material for: Identification of immunological and prognostic value of SHROOM2 in pan-cancer and experimental verification of its role in promoting malignant phenotypes in breast cancer
Source: PeerJ. 2025 Sep 25;13:e20051. doi: 10.7717/peerj.20051 (PMC12476865; doi:10.7717/peerj.20051)
Supplement: Supplemental Information 1 [file peerj-13-20051-s001.xlsx]

## Sheet: Sheet4
Table S1 siRNA transfection protocol
Step	Procedure	Key Parameters
1. Materials	• siRNA: GenePharma custom (Target siRNA + NC + FAM control)• Transfection Reagent: GP-transfect-Mate (Cat. G04008)• Cells: MCF7 (Passage ≤25, viability >90%)• Medium: DMEM + 10% FBS + 1 mM sodium pyruvate	• siRNA: 20 μM (dissolved in DEPC water)• Reagent storage: 4°C, dark
2. Cell Seeding	• Seed cells 24 h before transfection: - Digest with TrypLE → single-cell suspension - Density: 3.0×10⁵ cells/well - Add 2 mL complete medium → culture at 37°C, 5% CO₂	• Confluence at transfection: 50–70%
3. Complex Formation	Total volume: 250 μL/well① Tube A: 124 μL Opti-MEM + 100 pmol siRNA → mix gently② Tube B: 124 μL Opti-MEM + 5 μL GP-transfect-Mate → incubate 5 min at RT③ Combine Tube A + Tube B → mix gently → incubate 15–20 min at RT	• Ratio: siRNA:Reagent = 100 pmol:5 μL• Incubation time: ≤60 min
4. Transfection	• Aspirate old medium → add 1.75 mL fresh complete medium• Add 250 μL complexes dropwise → gently rock plate• Culture at 37°C, 5% CO₂	• Avoid serum in complex formation
5. Post-Transfection	• 4–6 h post-transfection: - Aspirate medium → wash with PBS once → add 2 mL fresh complete medium• Culture for 24–72 h (detection-dependent)	• Medium replacement reduces toxicity
6. Efficiency Check	• 24 h: Fluorescence microscopy (FAM control, >80% efficiency)• 48 h: qRT-PCR (mRNA knockdown)	• 3 biological replicates required
