# Supplementary material for: Identification of immunological and prognostic value of SHROOM2 in pan-cancer and experimental verification of its role in promoting malignant phenotypes in breast cancer
Source: PeerJ. 2025 Sep 25;13:e20051. doi: 10.7717/peerj.20051 (PMC12476865; doi:10.7717/peerj.20051)
Supplement: Supplemental Information 18 [file peerj-13-20051-s018.xlsx]

## Sheet: Sheet1
gene_name	log2FoldChange
CPLX2	2.95681
FGF4	2.75015
SYT4	2.42137
NEUROD1	2.3672
GPR139	2.05648
LIN28A	2.01231
SERPINA6	1.89578
CSMD3	1.89391
NSG2	1.89214
ZDHHC22	1.86973
UGT2B4	1.86785
SEZ6	1.85207
CLEC3A	1.78412
GNAT3	1.77448
PABPC1L2B	1.7328
NELL1	1.68653
PABPC1L2A	1.66644
SBK2	1.64314
KRT13	1.64242
FAM25A	1.61997
SLC4A10	1.61311
ADH7	1.61199
ASCL1	1.58717
CHRNA9	1.55838
LRTM2	1.54176
GRPR	1.53157
EIF4E1B	1.51849
CACNG6	1.50912
CPB1	1.49734
SEZ6L	1.45397
GATA4	1.44545
CPA6	1.44082
NEUROG3	1.4309
MS4A8	1.42731
ASIC2	1.4204
XKR7	1.41
RIMS4	1.4089
GRIA1	1.40615
MAGEB2	1.3873
S100G	1.38376
CDH10	1.37577
SVOP	1.36894
ZNF804B	1.35709
SHROOM2	1.35704
ZMAT4	1.35438
LHX1	1.32609
GLYATL3	1.3219
PEX5L	1.32153
POTEC	1.31443
SLC17A8	1.31355
EPHA6	1.31014
LRRC53	1.27564
KCNK16	1.27453
TGIF2LX	1.27416
LGI1	1.26066
ATRNL1	1.26035
GPR26	1.25902
ATP8A2	1.25603
SSTR5	1.24619
CCDC196	1.23919
NKAIN1	1.23793
PLCD4	1.23779
PXDNL	1.23333
CDC20B	1.23189
NTS	1.22979
MAGEA1	1.2186
SLIT1	1.20994
CST9	1.20792
MKX	1.20577
SLC30A8	1.20159
GFRA1	1.19123
ELAVL3	1.19055
DCAF8L2	1.18366
PWWP3B	1.17848
GAGE2A	1.17669
CHRNA4	1.16775
KCNF1	1.15963
REPS2	1.1579
NEUROD4	1.15482
VSTM2A	1.15463
INSM1	1.14243
ALDH3A1	1.13765
MUC5AC	1.12646
PCSK2	1.10811
HSD3B2	1.10673
MARCHF4	1.10417
PCSK1	1.10215
C1orf167	1.10061
NDST4	1.09682
TCL1B	1.09057
NPIPA7	1.08647
GNG13	1.0811
NELL2	1.081
CGA	1.07808
FOXN4	1.06764
GDAP1	1.06135
TEX13B	1.05711
PGR	1.0569
SLC5A7	1.05668
BMPR1B	1.05094
C2orf50	1.04285
IFITM5	1.04251
ARHGAP36	1.04123
NPY1R	1.03411
FCRLB	1.02919
IRS4	1.02882
SERPINA5	1.02199
CLSTN2	1.02108
OR4C11	1.02022
C10orf71	1.01943
CD177	1.01877
MEPE	1.01241
CDSN	1.00821
GABRA1	1.00781
PTPRQ	0.99728
GRIK3	0.991024
LMNTD1	0.988493
HS3ST5	0.982845
CALHM1	0.981414
CCDC68	0.979259
MMP10	0.978306
SLC39A6	0.973789
C1QTNF8	0.972809
SOX2	0.96408
C10orf82	0.958969
CYP2A6	0.956406
NLGN4Y	0.951102
RAB30	0.948487
RAB11FIP1	0.946103
ESR1	0.945368
ELOVL2	0.94489
MYOG	0.943426
OR10H1	0.939385
SYT13	0.938369
FAM169A	0.935701
AFF3	0.929633
CGB5	0.92813
SCGB1D4	0.927621
RUNDC3A	0.927484
CRH	0.927051
SYT5	0.92508
RBM24	0.923054
SHISA9	0.921954
SCG3	0.921575
TLCD3B	0.91959
RLN2	0.919319
MAGEB18	0.915297
SPACA7	0.912536
EMX1	0.912511
PRRT1B	0.910071
AC131160.1	0.907575
PGLYRP2	0.903605
KCNC1	0.899351
PARD6B	0.896031
POTEB3	0.894134
CACNA1H	0.893717
CA12	0.893102
GRM4	0.893063
GRIA2	0.892378
SHISA2	0.887958
AC011498.4	0.886339
TEX19	0.879908
CERKL	0.879595
INSYN2A	0.879455
SYNPO2L	0.872257
KRT35	0.870683
C1orf158	0.869713
CYP4F2	0.868755
PCDH10	0.867799
THSD4	0.864594
ADCY1	0.863244
PTPRT	0.862695
NEURL1	0.862453
DCAF12L1	0.861711
SMCO3	0.853621
CBLN2	0.852493
KCNH6	0.850453
SYTL4	0.848677
CCND1	0.848636
TBC1D9	0.846495
CELF3	0.844043
GPR143	0.843801
STC2	0.835652
ARMT1	0.835469
BSN	0.835329
WDR72	0.830533
HABP2	0.828379
FRMPD2	0.827375
KCNK15	0.825568
SYT1	0.823002
SLC7A2	0.822925
MYT1	0.821639
PDZK1	0.82095
IL20	0.81578
KCNU1	0.815388
ANO5	0.815147
SLC5A12	0.814483
WWP1	0.813714
GAL3ST2	0.813605
IL36A	0.80991
GREB1	0.808415
FMR1NB	0.807564
RNF225	0.807318
PRSS1	0.806115
GDPD3	0.805727
AMZ1	0.804076
FAM234B	0.803146
PI15	0.800145
MPP2	0.799769
ZNF92	0.798388
AGL	0.796431
FOXN1	0.795107
PAGE1	0.79359
RIPOR3	0.789716
SCUBE1	0.789286
ERICH3	0.786555
PAX7	0.784717
SSTR2	0.783078
NDP	0.782814
IGFBP5	0.782025
CACNG2	0.779037
MYF6	0.776769
NCAM2	0.775568
FREM2	0.775168
ZNF729	0.773517
SLC13A2	0.772803
KRT37	0.771915
NPNT	0.771749
PERCC1	0.770885
SERPINA4	0.769423
FOXJ1	0.769129
MAPT	0.767853
TMPRSS6	0.766621
AC093512.2	0.76639
PPP2R2C	0.765975
NPSR1	0.761717
CTNND2	0.760456
SYTL2	0.76031
CYP2B6	0.760151
NHLH2	0.757785
VWA5B2	0.757083
ECE2	0.757002
SLC7A13	0.755735
TEX14	0.754164
PHF21B	0.751817
CERS6	0.748487
LONRF2	0.747438
AMPH	0.747021
FAM184B	0.74595
RET	0.744785
CASKIN1	0.743398
NRCAM	0.742988
SLC8A2	0.740918
PCDH20	0.739779
FSIP1	0.736883
ACER2	0.736042
MPPED1	0.736016
HNF1A	0.735668
C16orf92	0.734989
ADAM18	0.734796
FRS2	0.734751
CACNA2D2	0.734149
PPP1R1C	0.732788
CDK5R2	0.732373
SLC4A8	0.73231
WDR38	0.730978
NGB	0.730613
ITIH6	0.72858
SYP	0.72809
ABAT	0.726467
TACR3	0.724351
GMCL2	0.722921
CLDN34	0.72224
DSCAML1	0.719949
C16orf89	0.719561
C14orf132	0.718458
SYTL5	0.718293
WFDC13	0.718003
ARNT2	0.717775
DCAF4L2	0.717575
SLC1A2	0.717055
PADI3	0.715129
TDRD9	0.709518
INPP4B	0.706403
BAIAP3	0.702489
NPY5R	0.69846
XAGE1A	0.697547
MEGF10	0.696813
ERLIN2	0.696803
DUSP13	0.695852
CHRNB2	0.694086
PREX1	0.692315
TRIM72	0.690338
RERG	0.688911
FAM155A	0.688686
ANXA9	0.687666
OTOR	0.686835
ABHD2	0.685065
RTP2	0.682957
CNTNAP2	0.68265
RBM11	0.681142
CST9L	0.680508
FSCB	0.679629
GATA3	0.678109
PTPRN2	0.677871
HS6ST3	0.677705
SMIM32	0.67737
CDON	0.677262
RABEP1	0.676373
AGR2	0.675284
TPSG1	0.675205
PLEKHD1	0.674893
CDYL2	0.674021
OTOP3	0.672468
IGDCC3	0.672293
CDHR4	0.67212
DNAJC22	0.671461
KCNE4	0.671419
GDNF	0.670738
SMPD3	0.670482
GNGT1	0.669351
C4A	0.669091
MYOZ3	0.668987
TMEM150C	0.6689
CEACAM16	0.668563
C10orf62	0.668178
METTL11B	0.66673
JPH3	0.666626
CTTNBP2	0.6665
THPO	0.666243
RAB39B	0.666203
MCIDAS	0.666186
CMYA5	0.664324
FAM47E-STBD1	0.663984
HSPB8	0.663323
PRRT3	0.663097
TMEM179	0.663
DACH1	0.662841
DGKK	0.662462
WFDC10A	0.661255
OPRD1	0.659771
SUPT20HL2	0.658139
MAP3K19	0.656696
MRPS30	0.656094
GDPD4	0.655694
FOXA1	0.654183
SALL2	0.653918
GATA2	0.650058
VWA5B1	0.649463
KITLG	0.64889
ADARB2	0.647875
KCND2	0.647309
ANKRD66	0.642745
CFAP74	0.642358
LETM2	0.642066
SLC9A2	0.641685
NETO1	0.640898
MS4A12	0.640396
ASB15	0.640367
RXFP3	0.640225
ACMSD	0.638739
SERPINA12	0.637488
SFTPA2	0.636706
RTL9	0.636507
DNAH5	0.636482
HAND1	0.635718
APBB2	0.635005
GLRA3	0.634171
C11orf97	0.633767
CFAP61	0.633183
PTPN13	0.632853
AFAP1L2	0.632524
SPANXB1	0.631909
SERPINA9	0.631592
ZSWIM5	0.631048
FBXL7	0.630566
FGFR3	0.628937
LGI3	0.628578
SYT9	0.626293
IGF1R	0.623535
GALNT4	0.621013
CCDC187	0.620683
TEKT1	0.620423
DSEL	0.619005
VWA2	0.618903
IL6ST	0.618771
EDARADD	0.618404
BRDT	0.617408
SDK2	0.615764
GLI3	0.614339
SIX1	0.614238
SCRT1	0.612609
TRIM58	0.612042
GJA1	0.611873
CST5	0.61156
PCDHA6	0.611506
ANKFN1	0.609687
NPFFR2	0.608749
CELSR1	0.607753
MSI2	0.607663
FAIM2	0.607615
RIMBP2	0.607608
FMN1	0.60737
SOX3	0.606056
MAGEB17	0.60536
DISP3	0.605298
SLC25A48	0.605214
NCBP2L	0.604989
SLC6A4	0.604886
TYRP1	0.604825
KCND3	0.60395
RAB27B	0.602645
GPR6	0.602371
AKAP14	0.59936
HTR1F	0.598194
CELSR2	0.598099
KCNC2	0.597683
CACNG1	0.597585
CYP2A13	0.597493
ERBB4	0.596981
MAGED2	0.59684
GLDN	0.595476
ATP9A	0.595114
SFXN2	0.594948
KLF17	0.593053
CYP4F11	0.59276
SPATA46	0.592654
TEX36	0.590594
USP35	0.590135
NAT1	0.589742
DCLK1	0.589713
MAP9	0.589115
TCF24	0.588486
AL049839.2	0.587129
ZIM2	0.58709
ADIPOR2	0.586938
CAPSL	0.586373
BRF2	0.58476
CCDC170	0.584397
HCN2	0.584084
HSFX1	0.584017
AR	0.582474
SCUBE2	0.582317
SLC35D3	0.581694
MAGI3	0.581174
KCNH1	0.580666
BDNF	0.577378
RGS22	0.577338
ATP7B	0.576468
WT1	0.576064
ADCY9	0.575966
CALCR	0.5753
FGFR1	0.574945
CCDC85A	0.574904
ZBBX	0.574048
FGF19	0.573964
NPC1L1	0.573106
ELP2	0.571434
C6orf141	0.570449
CSTL1	0.570122
TMEM145	0.569892
ZG16	0.569629
LGALS9B	0.569177
TRPS1	0.569039
SERPINA10	0.568896
NBEA	0.568201
PTPN1	0.567734
PLPPR3	0.567585
DOK7	0.567558
UGT3A1	0.567421
SSX2	0.567384
MS4A15	0.567151
LRBA	0.566751
DIO1	0.565546
DDHD2	0.565527
SIDT1	0.564853
MPP7	0.563938
MGAM	0.563562
PRLR	0.562873
VAV3	0.562452
PTH2	0.560026
ANO3	0.559065
SYN1	0.558084
ALOXE3	0.557758
INPP5J	0.557301
RHAG	0.55726
LRRC8E	0.556649
CST8	0.555964
ARFGEF3	0.555425
PLS1	0.555267
NSD3	0.55433
CACNG4	0.554103
CNGA2	0.553203
IL9	0.552879
ADGRB2	0.551406
CCDC87	0.550806
ACADSB	0.550692
KLK12	0.550673
RASEF	0.550345
MACIR	0.549561
NRIP1	0.549447
BAG4	0.549405
SLC27A2	0.549085
KAT6A	0.548868
CECR2	0.548359
SLITRK1	0.547437
VWA3A	0.546843
AMIGO2	0.545639
CYP4F3	0.545443
PCDHA12	0.545428
SMIM34B	0.54507
MYRIP	0.544853
MS4A7	0.544821
SYBU	0.543392
MRTFB	0.542641
TENM3	0.541345
AGTR1	0.541301
SLC7A8	0.540925
ANOS1	0.54032
ST8SIA6	0.540237
CCDC60	0.539435
RETREG1	0.539255
WFS1	0.53894
SLC4A7	0.536582
TANC2	0.536285
AQP11	0.535198
LIN7A	0.534856
MAG	0.534722
SPAG17	0.53469
KRT31	0.53448
LRRC3C	0.534246
TBX3	0.533662
TTLL6	0.532395
EPB41L5	0.53209
LARGE1	0.53103
PPM1H	0.530875
RPTN	0.530222
SAMD15	0.529544
SIX4	0.529131
TFPI2	0.528702
ENPP1	0.528698
DEFB126	0.528638
OLIG3	0.528497
CFAP20DC	0.528333
XBP1	0.528196
MYB	0.527981
MEI4	0.527805
KLHL1	0.527783
TUBA3C	0.527181
CRISP1	0.52638
RMND1	0.526114
POTED	0.525776
RAB6C	0.523571
KRTAP3-3	0.523034
PCDH19	0.522321
TMEM82	0.522217
KCNG4	0.522156
KNCN	0.522065
MCCC2	0.521877
CCDC83	0.521746
GATA5	0.521377
C11orf42	0.521347
ANKRD30B	0.521329
MAGEA12	0.520772
ACTL6B	0.519902
PLEKHF2	0.516181
CAMK2B	0.515886
GDF9	0.515876
CYP51A1	0.515674
SPOPL	0.514325
AC004706.3	0.514278
DNAJC14	0.51388
CLEC2A	0.513832
SHANK2	0.513774
WDR17	0.512557
FAM110B	0.511319
ARSG	0.51105
TOX3	0.510727
DNALI1	0.510438
RALGPS2	0.510283
SPTBN4	0.510187
POTEJ	0.509981
PCDHA13	0.509259
MFAP3	0.509112
PPP4R4	0.508938
GASK1B	0.508789
C4B	0.508673
ERO1B	0.508105
ITGA2	0.507986
CXXC5	0.507152
SHISA6	0.506885
WNK4	0.506838
COL10A1	0.506546
CRISP3	0.506323
ATP6V1G2	0.506295
DUXB	0.506179
UBXN10	0.504406
RPS6KA6	0.504116
SCNN1G	0.503267
EXOC2	0.503091
ABCC5	0.503085
TOM1L1	0.500626
NOS1AP	0.499454
ADAMTS18	0.499255
MCCD1	0.499099
CFAP97D2	0.497978
PTGER3	0.497662
RAB31	0.497364
CERS2	0.496825
OSBPL6	0.496578
ABCA12	0.496028
GALNT5	0.495537
PAGE2B	0.495393
ITPRIPL2	0.4953
SLC2A10	0.495208
SLC14A2	0.494764
SH3BGRL	0.494383
ANO1	0.494336
SYT7	0.494207
PCLO	0.493907
SLC40A1	0.493354
PVALB	0.492876
ENPP5	0.492818
HOGA1	0.4924
KRT24	0.492068
MRGPRD	0.491446
HTR1E	0.490912
ZNF587	0.490859
AMHR2	0.49082
NAV3	0.490592
KIAA0319	0.490511
PRSS2	0.490354
CFAP94	0.490252
LRP2	0.490015
DLG5	0.489775
ELAPOR2	0.489395
PRSS23	0.488681
H3Y1	0.488183
ASB16	0.48793
CYB5D1	0.487683
PLCL1	0.487431
KIAA2012	0.487016
TBX22	0.487016
MDM2	0.486796
LDLRAD4	0.486669
AFF4	0.486583
SERPINA11	0.485666
SSTR4	0.485474
TMEM229B	0.485314
HLTF	0.484953
UCP1	0.484913
BCAS4	0.484861
AGR3	0.484438
TP53INP1	0.484369
PEG10	0.483911
CMBL	0.483898
ADGRV1	0.483084
FRY	0.482672
SCIN	0.482565
HACD3	0.482094
NOVA1	0.482043
KCTD21	0.481604
ZXDB	0.481404
GLYATL1	0.481298
GALNT6	0.481249
SRMS	0.481195
XIRP2	0.481129
KLHDC7A	0.480062
RIMKLA	0.479864
TPBG	0.479651
IRS1	0.4795
SPAM1	0.479249
SPRN	0.478732
SLC38A1	0.478346
RHOBTB3	0.478076
C5AR2	0.47778
DNAI1	0.477497
DNAJC12	0.47738
ANKS1B	0.477032
RSPH4A	0.476831
GPRC5A	0.476802
SPRR2B	0.476771
ASH2L	0.476553
BCL2	0.476515
PCDHA3	0.476296
ZNF552	0.475969
UNC5A	0.475783
HMX2	0.47521
TENM2	0.475066
RAB38	0.474597
ADAMTS15	0.474545
OR6T1	0.474528
SYT10	0.474115
CYFIP2	0.473549
KIF3A	0.473361
AK7	0.473184
ST6GALNAC2	0.473043
SRARP	0.472951
AMN1	0.472437
HCAR1	0.471791
SFTPA1	0.471712
CFAP91	0.471326
ENO2	0.471113
SLC9A3R1	0.470265
SYT17	0.469754
RTN4RL1	0.469715
FLNB	0.469711
ARHGAP35	0.469624
UPK1A	0.469054
LGALS9C	0.468979
PRR15	0.468956
MED13L	0.468886
NHS	0.468004
SCNN1A	0.467121
ANKRD63	0.466855
ZNF365	0.466306
CBLN1	0.466221
ZNF703	0.465826
MEGF9	0.465688
PCDHA11	0.465589
TCEAL1	0.465426
USP41	0.465402
COL11A1	0.465076
ZNF486	0.464899
CCDC190	0.46413
RSF1	0.464047
POU4F3	0.462949
HRH3	0.462522
ASTL	0.462056
SORCS3	0.461925
GSTCD	0.461748
FSTL4	0.461274
USP37	0.461166
KIAA0232	0.459716
PEG3	0.459268
BRINP2	0.45913
TP73	0.458985
KIF16B	0.458817
AP3M2	0.458622
EXOC6	0.45784
RASSF8	0.457179
KIF13B	0.456944
HSFX3	0.456326
WNT7B	0.456321
NRSN1	0.455787
HUNK	0.455684
ADCY5	0.455159
FBP1	0.454913
CCDC144A	0.454512
PLPP5	0.454414
JPH1	0.454254
KSR2	0.454193
SLC18A2	0.454174
DHRS2	0.454122
CNGB3	0.453857
VEZF1	0.453768
MARVELD2	0.453681
DCAF10	0.45344
TRH	0.453322
ILDR2	0.453274
RBBP7	0.452526
EEF1A2	0.452429
DNAH10	0.452353
PIEZO2	0.452097
KCNJ3	0.451349
LRATD2	0.451259
PDE5A	0.451054
KIF5A	0.450777
RDH16	0.450642
PDK2	0.450442
ARHGAP32	0.45031
TSPAN13	0.449878
SOGA1	0.44985
AC005041.1	0.449537
ABHD12B	0.449512
RALGAPB	0.44902
CNR1	0.448817
ARFGEF2	0.448633
SALL1	0.448611
GOLM1	0.448544
HSPA12A	0.448184
STK39	0.448046
ADAMTS19	0.447815
GREB1L	0.447716
ARFGEF1	0.447652
GRIK4	0.447573
ARPP21	0.447073
SSX3	0.44639
SMAD3	0.446064
MAFA	0.445676
PBX1	0.445408
MAST4	0.445079
MYMK	0.444775
RAMP1	0.444687
FYB2	0.444211
MID2	0.443827
CDH1	0.443702
SYNC	0.443347
AKR7A3	0.443251
AL021997.2	0.442699
APOOL	0.442217
LMBRD2	0.441745
KRT33A	0.441359
LDLRAD1	0.44122
MAPK8IP1	0.440949
MS4A14	0.440759
TRERF1	0.440709
NUDT12	0.44057
SLC24A2	0.440435
NLRP5	0.439605
SEC24C	0.439166
NAT8	0.439124
TAF1L	0.438887
CT55	0.438699
BMERB1	0.43865
UGT1A8	0.43832
CHRD	0.438233
WNT5A	0.437863
PRTN3	0.437791
RHBDL3	0.437378
COL4A6	0.437185
ITPR2	0.437091
UNC5C	0.436939
TSPAN1	0.436563
CGN	0.43641
PYY	0.436215
CATIP	0.436109
CPN2	0.435793
CAND1	0.435749
TXNDC16	0.435714
TESK2	0.435366
CIPC	0.434963
ALG1L	0.434841
ZNF776	0.434612
FBXO36	0.434612
FAM110C	0.43458
CAP2	0.434498
CLVS2	0.434446
CORO2A	0.434197
PLAC1	0.434079
ABCD3	0.433734
PCSK6	0.433665
ARX	0.433631
PPFIA1	0.433149
BCAS1	0.433023
SLC26A5	0.432793
LMX1B	0.432611
SHROOM3	0.432274
MAGEE1	0.432271
GPD1L	0.432016
EIF1AY	0.431839
ZNF217	0.431782
RD3	0.431583
TTC30A	0.430993
GPER1	0.430811
FN1	0.430771
GUCY1A2	0.430735
ASTN2	0.430361
WDR31	0.4303
KCNJ11	0.430218
TTC39A	0.429298
SERINC5	0.429099
ILDR1	0.428576
SYAP1	0.428398
DEFB132	0.428083
RIMBP3	0.427973
GAB2	0.427939
CXCL14	0.427935
EPN3	0.42771
TMEM26	0.42665
SLITRK6	0.426486
WNT3	0.426386
SLX4	0.426133
CHD6	0.42598
PANK3	0.425942
KRTAP3-1	0.425807
MTUS1	0.42542
R3HDML	0.42523
RAD50	0.425178
NOMO3	0.425144
CRYBA2	0.425015
SRGAP1	0.42499
FAM135B	0.424971
JAKMIP3	0.424124
EPN2	0.42377
PLPBP	0.423565
KDM4B	0.423093
STMND1	0.423036
SCN8A	0.422787
TTC29	0.422541
LDHAL6A	0.422393
BTRC	0.422058
SPA17	0.421859
NUP62CL	0.421137
UGCG	0.420987
CCDC103	0.420837
MBTPS2	0.420319
AHNAK	0.420064
UEVLD	0.419996
LIMA1	0.419867
IFNW1	0.419698
SMIM38	0.419599
PNMA2	0.419409
MUC7	0.419295
WWOX	0.419265
MYO6	0.418973
KCNK2	0.418725
EFR3B	0.418204
STK32B	0.418062
IGSF9B	0.417909
ANK1	0.417758
WNT3A	0.417579
PPM1E	0.417449
P2RY2	0.417143
MYF5	0.416799
HOOK1	0.416662
FITM2	0.416357
IGSF1	0.416282
CACNA1D	0.415838
BAZ2A	0.41575
NRK	0.415731
DNAJC6	0.415573
CCDC148	0.415339
RALGPS1	0.415114
ZNF497	0.414482
PIFO	0.414462
KIF3B	0.414034
GP2	0.413855
SLC26A1	0.413806
MYOF	0.413629
KLHL11	0.413516
TTC6	0.413487
FGF10	0.413205
FER1L6	0.41274
SMOC2	0.412328
FOXD4L4	0.411441
ROBO2	0.410578
ZNF704	0.410397
PRKAA2	0.410384
NEXMIF	0.410273
TPH1	0.410265
HIP1	0.409975
DCDC1	0.409315
FNIP1	0.409176
ABLIM3	0.40912
BEX1	0.408863
CLTC	0.408222
DUSP5	0.40809
SMARCA1	0.407588
MGAT4A	0.407585
TRIM37	0.40675
RAI1	0.406417
MINDY1	0.406055
INCA1	0.405924
NBPF3	0.405429
STC1	0.405314
RGS8	0.404815
DRC1	0.404806
SLC47A1	0.404397
ABCC8	0.404353
IQUB	0.403968
TMEM215	0.403945
STRN3	0.40394
EVPLL	0.403918
KRTAP5-11	0.403816
LMOD2	0.403625
DNAL1	0.403529
ANKRD50	0.40341
SEMA3C	0.403331
DOP1B	0.403288
PFKFB3	0.403121
DMBX1	0.402786
SLC24A1	0.402697
EPS8	0.402529
CFB	0.402406
DMRTC1B	0.401985
PSKH2	0.401859
SULF1	0.401749
STMN3	0.401695
CFHR3	0.401681
THBS2	0.401316
GPC4	0.401278
GRM1	0.400952
LNX1	0.40084
SARM1	0.4005
HSFX2	0.400384
ERBB3	0.400366
RRM2B	0.400329
CRACD	0.400215
POSTN	0.400175
CTPS2	0.399784
SMCR8	0.399682
KCTD6	0.399625
TESMIN	0.399533
TNFRSF10C	0.399197
IFT140	0.399027
PCDH1	0.398984
INHBE	0.398706
AC092718.3	0.398653
HECTD4	0.39841
GABRA2	0.398338
GCSAML	0.398235
ALDH3A2	0.39816
GPR39	0.397866
NTN1	0.397429
RAB11FIP3	0.396435
SOX5	0.396262
VPS13B	0.39544
PPP1R3C	0.395369
GPHN	0.395227
MLNR	0.394679
GFM2	0.394623
CCDC175	0.394522
LURAP1L	0.394414
NUDT4	0.394411
ZNF385B	0.394394
FKBP4	0.394149
ATP8B1	0.39378
RBM20	0.393753
CAPN9	0.393639
GPR50	0.393377
SLC22A23	0.393273
ZNF813	0.393193
PNPLA4	0.393117
TPPP	0.392984
CDC42BPB	0.392932
FOXD2	0.392833
ZNF322	0.392779
AL160272.2	0.392676
CPEB2	0.392545
GLUD2	0.392167
CFAP43	0.392092
HPS3	0.391998
CHST15	0.391851
NXNL2	0.391343
ZNF396	0.391018
PKIA	0.390766
ETNK2	0.390564
SORCS1	0.390337
RXRG	0.38994
RAP2C	0.389852
NDNF	0.389634
HAL	0.389489
CPEB4	0.389314
EDA2R	0.389214
IQCH	0.389154
FAM214A	0.389014
FUT8	0.389012
FLT3	0.388889
SFXN5	0.388696
NRXN3	0.388554
CSNK1A1	0.388534
AMFR	0.388512
UHRF1BP1L	0.388358
IL1RAPL2	0.388202
CCDC117	0.388107
ZKSCAN2	0.38791
WWC2	0.387466
NEBL	0.387344
OR6B3	0.387256
RLN1	0.386376
IQSEC2	0.386231
CPE	0.3862
SEMA3F	0.386077
OR56B4	0.38579
PTCHD4	0.385692
EBF4	0.385635
FRMD6	0.385622
RNF40	0.385189
TP53BP1	0.384678
ERI2	0.384539
ACOX2	0.384412
UGT2B17	0.384108
EGLN2	0.383939
TSTD2	0.383812
NPEPPS	0.383744
B3GALT5	0.383735
MAP3K1	0.383568
SLC24A3	0.383246
WASHC5	0.382725
HOXC4	0.382675
TIGD4	0.381855
OCLN	0.381697
CCNO	0.381527
GDPD1	0.381312
TMEM144	0.381049
PMAIP1	0.38092
FADD	0.380878
RAB3IP	0.380838
CFAP46	0.380726
WNT9A	0.380551
MYO5C	0.380457
MED12L	0.380426
RNF169	0.380206
KBTBD4	0.380195
PIP4K2C	0.380114
DCAF16	0.379976
TAF9B	0.379737
LRRC74B	0.379655
NEO1	0.379599
KDM5D	0.379478
COL4A5	0.379225
M1AP	0.379159
CABP4	0.3789
ZNF860	0.378497
IL24	0.37842
SUSD3	0.378116
MAP6D1	0.377947
C2CD3	0.377635
ARSD	0.377627
HHAT	0.377308
BHLHE40	0.377301
NCKAP5	0.377265
PYDC1	0.377214
GALNT10	0.376983
ANKRD31	0.37681
LCN12	0.376636
PYGL	0.376618
TSPAN31	0.376595
ADCY6	0.375872
ANKRD52	0.375745
PLIN5	0.375588
DNAJA4	0.375564
LRIG1	0.375174
PHEX	0.375147
GSE1	0.374049
IDS	0.373899
TBL1X	0.373668
CPLANE1	0.373631
ARID2	0.373615
NUAK1	0.373615
EML1	0.373522
ABCC6	0.373442
ADGB	0.373133
SMARCC2	0.373117
STXBP4	0.373035
DTWD2	0.37285
TBX10	0.37263
PRRC2B	0.372318
ZMYND8	0.371861
ADAMTSL3	0.371846
CCNG2	0.371756
ABCA3	0.371744
TRIM9	0.371739
ZFYVE16	0.371648
SBF2	0.371635
HID1	0.371624
UGDH	0.371421
DHX40	0.371204
BCOR	0.371085
UGT1A7	0.371017
NXPH2	0.370858
PLA2G12A	0.370652
NLRP12	0.370648
BBX	0.370435
RIPPLY3	0.370287
SH3RF1	0.369925
MAGI2	0.369833
ACVR1B	0.369363
STH	0.369261
TMEM135	0.369203
STXBP5L	0.369138
SMG8	0.368689
TCEAL4	0.368657
SLC35E3	0.368648
AP2B1	0.368605
TRAPPC6B	0.368548
RAI2	0.368445
TPSD1	0.36825
CHM	0.367993
CCDC113	0.36791
IYD	0.367794
ROPN1L	0.367313
FOXE1	0.366911
DCHS1	0.366544
KIAA1958	0.366472
SNAP25	0.366324
OPRL1	0.366
ARL3	0.365969
PLPPR5	0.365729
HSPA2	0.365714
MSMB	0.365428
MTX3	0.365072
SMAD5	0.364974
ERGIC1	0.364945
CPNE3	0.364938
EPHA10	0.364861
SCG2	0.364715
APPBP2	0.364707
LARP4	0.364601
SHOC2	0.364525
OCRL	0.364279
MYO18B	0.364161
POTEH	0.364104
TNNT1	0.36409
RAPH1	0.363975
C2CD4C	0.363893
SLC12A2	0.363364
MUC2	0.363217
MCC	0.363003
PHKA1	0.362493
SHTN1	0.36247
GLOD5	0.362294
SMIM14	0.362047
ANKRD42	0.361955
SMG6	0.361827
SIAH2	0.361753
CNNM4	0.361578
MIER3	0.361501
EMSY	0.361475
C20orf85	0.361458
EFHC2	0.3613
NAF1	0.361255
ZXDA	0.361206
ITPRID2	0.360772
SLC22A5	0.3607
JADE3	0.360494
DHCR24	0.360172
DAGLA	0.360172
P2RY4	0.360068
APOBEC4	0.359881
UBE2QL1	0.359662
TAB3	0.35955
ZNF770	0.359519
EPHA3	0.359355
CST11	0.35869
SPIN3	0.35869
RALGAPA1	0.358655
TRIM23	0.358334
TMEM106B	0.358314
KAT6B	0.357887
HTT	0.357741
LNX2	0.357629
KTN1	0.357472
CADM2	0.357444
FAM131B	0.357348
ABCA2	0.356853
PJA2	0.356717
YY2	0.356302
DCTN4	0.356251
RBM47	0.356237
MDM1	0.356145
MMP26	0.355738
ZNF609	0.355726
MYEF2	0.3557
DMRTC1	0.355376
CHD5	0.355334
TCTN2	0.355257
YTHDC2	0.355176
LRRIQ3	0.355054
MICAL2	0.355014
TTC8	0.354981
GNPNAT1	0.354939
CHRM4	0.354911
ALG10B	0.354819
CPT1A	0.354478
SOHLH1	0.354399
CSNK2A3	0.353932
CCDC201	0.353917
GALNT16	0.353708
TCEAL3	0.353003
CTR9	0.352936
AC253536.7	0.352912
TOGARAM1	0.3528
TTR	0.352655
BRD3	0.352628
CDS1	0.352458
SH3BP4	0.352354
GABRB2	0.35218
B3GNT10	0.351827
CEACAM6	0.351793
ISOC1	0.351566
EPX	0.351215
GDF6	0.351141
CCDC125	0.351118
FFAR2	0.351022
DIP2B	0.350838
N4BP3	0.350425
PEX11A	0.350407
HOXC13	0.350273
DMXL1	0.35003
TAS2R1	0.349978
DCDC2	0.349943
INTS2	0.34991
ZNF525	0.349588
EPHA5	0.349559
ANKRD30A	0.34954
ASAP2	0.349463
TENT4B	0.349398
NEK4	0.349272
ATP7A	0.349192
DUSP4	0.34913
CCP110	0.349025
C9orf64	0.348993
MUC21	0.348965
TTLL9	0.348538
KCTD3	0.348448
ZFX	0.348158
KNDC1	0.347989
PSD3	0.347845
COL12A1	0.347844
XPC	0.347741
NAT2	0.347514
DNMBP	0.347449
DENND4C	0.347379
KMT2D	0.3473
PDPK1	0.346903
PGM2L1	0.34662
PAH	0.346356
AL121753.1	0.34628
YEATS4	0.346145
C9orf152	0.346114
KDM3B	0.346078
REEP1	0.345908
TEX47	0.345839
EVC	0.345755
SPG11	0.344878
ZFHX3	0.344564
SMIM6	0.344486
GNG3	0.344277
IPPK	0.344182
EYA1	0.344154
CCDC173	0.344044
KLHL42	0.343818
GAB1	0.343756
APC	0.343744
FRYL	0.343742
LDLRAD3	0.343609
SEC14L5	0.343577
TCERG1L	0.34345
COBLL1	0.343052
CCDC158	0.342998
LIPI	0.342965
SPEF2	0.342812
CCDC88C	0.342662
ICA1L	0.342586
TMEM67	0.342265
AAGAB	0.342261
RNF123	0.342241
PCDHA4	0.342005
SREBF1	0.341705
ARHGEF26	0.341684
MMP13	0.341595
NUMA1	0.341472
DEFB131B	0.341341
PCDHA2	0.341095
SLC22A25	0.341091
PCYOX1	0.341011
LRRIQ1	0.340692
ITGA11	0.340605
CFAP206	0.34045
GALNT7	0.340083
BECN1	0.340059
TMEM212	0.339998
SCD	0.339716
CAPN13	0.339462
DGKE	0.339447
UBE2F-SCLY	0.339368
LGALS8	0.339038
PI4KA	0.339007
AC003002.3	0.339002
SLC44A4	0.338974
ARMC9	0.338947
ARHGEF6	0.338755
DRC7	0.338622
MMP11	0.338035
THBS1	0.337966
UBFD1	0.33759
DYNC2H1	0.337543
ZNF28	0.337335
CHRNA6	0.337272
TENM4	0.337075
UGT3A2	0.337051
DSCAM	0.337021
XYLT1	0.337019
ZNF468	0.337016
LPCAT3	0.336895
MAGEA2	0.336851
NBPF4	0.336773
ZNF281	0.336576
TMEM30B	0.336337
FYCO1	0.336336
OTUB2	0.336327
MCM3AP	0.336286
USP38	0.33628
ASAH2	0.336265
SLC19A2	0.33612
RASA1	0.336008
COQ7	0.33593
H2AL1RP	0.335681
ULK2	0.335652
DHX29	0.335544
DTD2	0.335393
SLC39A8	0.335092
GPAT4	0.334735
SPTY2D1	0.334561
EPB41L4A	0.33441
ADAMTS12	0.334374
CSNK1G1	0.334158
LRRC4C	0.334133
CSNK1G3	0.333988
ZNF516	0.333949
TBC1D14	0.333774
FAM167A	0.333719
WDFY3	0.333563
CBY2	0.333485
UBE3B	0.333373
BARHL1	0.333319
PAX2	0.333249
OAS3	0.333211
TMEM192	0.333185
PCDHA5	0.333126
UBR5	0.333086
H4-16	0.333002
SRCAP	0.332857
ABCG1	0.332839
TTC37	0.332375
SPPL2C	0.332214
KIF21A	0.332169
RUBCN	0.332053
RAB3B	0.332042
N4BP2	0.331984
KCNH2	0.331981
FAM47A	0.331848
AC098850.3	0.331819
KIAA1109	0.331729
NCOA3	0.331707
ARHGEF17	0.33163
L2HGDH	0.331471
APH1B	0.331231
SRPK2	0.331074
ZBED6	0.330975
RAB3D	0.330865
SLC35D1	0.330667
NQO1	0.330666
RANBP3L	0.330571
SSH3	0.330519
ZNF24	0.330463
CROCC2	0.330002
ALG8	0.329916
LRRC56	0.329845
TRUB1	0.329603
RUSF1	0.329512
TBC1D30	0.329443
KCNK3	0.329441
ALG11	0.329018
ATG2B	0.328965
FAM161B	0.328949
TMED8	0.328763
RUNDC1	0.328623
TRIQK	0.328431
HUS1B	0.328431
RNF141	0.328062
LY6G6C	0.3279
LRRC15	0.327832
GPR160	0.32777
NF1	0.327768
GPR37L1	0.327741
KATNIP	0.327656
WSCD2	0.327018
RALGAPA2	0.326906
ZNF304	0.326888
CDKL2	0.326785
PIK3C2A	0.32675
ZMIZ1	0.326662
OR4D10	0.326498
SAMD12	0.326472
UBR1	0.326424
LONP2	0.32642
NME5	0.326341
PCDHGB2	0.326084
PHLPP2	0.326078
KAT7	0.32601
GOLGB1	0.325813
VRK2	0.325678
ATP6V1B1	0.325323
MGAT4D	0.325213
S1PR3	0.325158
FAM102B	0.325009
TAOK1	0.324975
TRAM1L1	0.324892
C12orf66	0.324871
CSRNP2	0.32486
SPDYC	0.324682
TMBIM6	0.324679
RBL2	0.324539
HEATR6	0.324434
CAMK2N1	0.324412
BBS4	0.324225
GJA3	0.324223
PLEKHH1	0.32404
IP6K3	0.324019
PRTG	0.323921
PAEP	0.32372
ARMC4	0.323661
CDC14A	0.323592
KIFBP	0.323551
CNST	0.323491
MCOLN3	0.323425
SCCPDH	0.323341
SEC23IP	0.323302
APELA	0.323102
DPY19L4	0.323093
LYPD6	0.322572
TCTN1	0.322386
USP47	0.322289
MC2R	0.322186
RPRD1B	0.322159
CLDN25	0.322049
CANT1	0.321972
SETBP1	0.321911
FBXL5	0.321679
RBFOX1	0.321564
MIGA1	0.321485
KRTAP10-2	0.321128
PDCD4	0.321085
PRMT8	0.320951
JADE2	0.32074
FNDC11	0.3204
HIPK1	0.320345
NBPF6	0.320311
MBD6	0.320301
CACNG8	0.320177
DCAF12L2	0.319974
TCP11L2	0.319864
PLA2G4F	0.319646
SEC24D	0.319545
WDR19	0.319478
HSDL2	0.31941
DNAAF6	0.319246
MAP6	0.319189
STAU2	0.319181
CUL3	0.319057
TMEM132D	0.319038
USP30	0.31895
C5orf24	0.318947
IFIT1	0.318438
CHDH	0.318339
FAR1	0.318329
DRP2	0.318324
MED13	0.318183
IL13RA1	0.318072
MINPP1	0.318041
CPD	0.317883
DYNLT3	0.31782
ETFBKMT	0.317718
AMDHD1	0.317619
SLC1A4	0.317514
GOLGA7	0.317446
ALDH5A1	0.317293
CFAP99	0.316863
PMEL	0.316802
ZNRF3	0.316743
GABRG2	0.316706
SULT1A2	0.316418
RBBP8	0.315741
DZIP3	0.315722
SNED1	0.315595
GNAO1	0.315569
ARRB1	0.315512
ARHGAP5	0.315493
ZFY	0.315396
KCNS3	0.315338
POLK	0.315201
FAM13B	0.315197
TMTC3	0.315136
PHF20	0.31506
CCNE2	0.314947
ENO4	0.314784
ARHGEF12	0.314602
CROT	0.314537
TEAD1	0.314491
GPR137B	0.314358
ZNF541	0.314248
IBTK	0.313725
OR5A2	0.313714
CHD1	0.313604
UNC5B	0.313604
HDGFL3	0.313597
CRACR2A	0.31352
AKAP10	0.31343
FBXL17	0.313415
TRIM3	0.313332
ZNFX1	0.313282
ARMCX3	0.313148
KISS1R	0.313079
TMEM184C	0.313066
RABL3	0.312857
SLC22A24	0.31275
NUBPL	0.312687
MTCL1	0.312473
SCRT2	0.312288
C3orf52	0.312267
C5orf49	0.312215
UBXN2B	0.312039
TMEM229A	0.311649
BPTF	0.311641
USP22	0.311389
PCDHA10	0.311279
MAP3K12	0.310936
PLAAT5	0.310755
DDX60	0.310717
HECTD2	0.310585
GTF3C1	0.310538
TRIM32	0.310362
ZNF728	0.310338
CYP4V2	0.310265
NTN4	0.31023
EFCAB12	0.309939
FRMPD3	0.309909
SERPINI1	0.309901
ZNF620	0.309842
ROR2	0.309776
CDK17	0.309666
ZNF772	0.30965
PRKG1	0.309602
NPTXR	0.309568
LMLN	0.309553
TAPT1	0.309475
BOD1L1	0.309403
RSPH3	0.309199
RIBC1	0.309135
ATRX	0.309007
SLC25A35	0.308975
PATJ	0.308943
SATB2	0.308942
EFEMP1	0.308852
ADNP	0.308807
BCORL1	0.308712
KIF6	0.308438
ZNF664	0.308427
SCAMP1	0.308384
DNAH7	0.30837
FAAH2	0.308359
SLC46A1	0.308136
GLRB	0.308081
CFAP57	0.308024
TMED7	0.30754
DDO	0.307448
SLC35A3	0.30738
SGCG	0.306924
ASPH	0.306646
SCRN3	0.306584
SPAG1	0.306411
COPG2	0.306183
DBNDD2	0.305859
RASL11B	0.305763
CRNKL1	0.305621
BMP8B	0.305497
ANKFY1	0.305495
NBR1	0.305378
EIF2S3B	0.305278
TSPYL4	0.305271
SERF1B	0.30526
PAN2	0.305205
NRIP3	0.305015
ERBIN	0.3049
BMP8A	0.304874
UBE4A	0.304493
TECTA	0.304485
TNKS2	0.30433
CLCN3	0.304146
MISP	0.304087
SLC25A24	0.304066
CTC1	0.303976
CARTPT	0.303862
PREPL	0.303682
LANCL1	0.303652
BRD3OS	0.303605
YPEL2	0.303476
TMPRSS4	0.303457
SYCP2	0.303422
UGT2B15	0.303377
THTPA	0.303289
GPR137C	0.303261
UGT2A1	0.303232
GSG1L	0.302949
XAGE1B	0.302842
KDM6A	0.302685
TTC30B	0.302234
ANKEF1	0.302189
EMP2	0.302125
GPD2	0.301868
FBXW11	0.301443
TBC1D19	0.301104
PRKCD	0.301014
ZC2HC1A	0.301
MAPK9	0.300791
LYSMD3	0.300647
MFSD14A	0.300531
GJB7	0.300304
TMC4	0.300169
NDUFC2	0.300074
PEX1	0.300005
IPP	0.29998
C4orf19	0.299958
PCM1	0.299951
TCAF1	0.299897
PIGO	0.29988
C1orf226	0.2996
ZNF718	0.299565
ZNF737	0.299371
SYS1-DBNDD2	0.29934
ANKRA2	0.299331
GAPVD1	0.299329
HECTD1	0.299222
PER3	0.299145
CFAP52	0.298959
FBXO21	0.298917
CDK15	0.298798
TSPAN5	0.298654
SPOCK1	0.298623
FBXL16	0.29844
AKAP9	0.298426
RTL6	0.298391
ESRP2	0.298321
SRGAP2B	0.298313
NPIPA9	0.298248
SAMD11	0.298233
ASAH1	0.298196
FBXO15	0.297842
OR2C1	0.29761
MAP1A	0.297521
GTF2I	0.297503
SEMA3B	0.297448
MTUS2	0.297419
ERMP1	0.297351
DAAM1	0.297296
PCMTD2	0.2972
FBXO38	0.297075
NXPH3	0.296882
SYDE2	0.296758
MED14	0.296734
SEPSECS	0.296602
NBPF9	0.296584
MOAP1	0.2964
BRPF3	0.296347
TMEM181	0.29617
CXXC4	0.2961
EDEM3	0.296092
USP46	0.296087
CA7	0.295906
SIN3A	0.295858
ANKRD40	0.295517
ZNF107	0.295468
WAPL	0.295285
PCDHGA1	0.295253
SLC16A14	0.295214
SERINC3	0.295198
KLHL32	0.294662
ARMC3	0.294549
OTOGL	0.294527
TP53I11	0.294366
DEGS2	0.294196
SLC16A6	0.294171
ST3GAL1	0.293974
OR5A1	0.293907
ZNF329	0.293804
SGPL1	0.293704
MTREX	0.293693
ZNF680	0.293556
CTNNA1	0.29353
FGD6	0.293464
IFT81	0.293409
NCR3LG1	0.293349
AK9	0.293288
UNC13A	0.293285
MSH3	0.29307
ITPR1	0.292912
DNAAF1	0.292863
EIF3C	0.292806
H2BC21	0.292649
SLC39A9	0.292557
PAX9	0.292542
IL17RB	0.292527
GSPT1	0.292468
AFF1	0.292461
ALDOA	0.292363
KIAA0319L	0.292322
KIF13A	0.291777
TTC26	0.291676
GLUL	0.291624
PAXIP1	0.291507
SPRED2	0.291262
YIPF6	0.291165
SLC46A2	0.291161
SAXO2	0.291153
STS	0.291077
FRRS1L	0.29104
GCC2	0.29096
PPP1R3D	0.290916
PTPN3	0.290812
SLC12A5	0.290716
LEF1	0.29064
TAF1	0.290609
CCNT1	0.29035
RIMBP3B	0.290293
CFAP70	0.290244
FAM199X	0.290139
SRP54	0.290059
SLK	0.290026
ZMYND10	0.289896
CUEDC1	0.289752
ZNF287	0.289629
MORF4L2	0.289543
EFCAB11	0.289442
USP8	0.2893
C17orf58	0.289226
KMT5B	0.289071
TLE3	0.289057
KIAA0100	0.289024
CA14	0.288881
AOX1	0.288723
PDE11A	0.288713
AXIN2	0.288404
ZNF705E	0.288355
ZBTB41	0.288345
TP53TG5	0.2883
LZTFL1	0.288272
DNAAF3	0.288207
ZNF81	0.288148
ZNF629	0.288079
MAN2A1	0.288024
USP9X	0.287887
DYNAP	0.287753
BDP1	0.28749
TMED7-TICAM2	0.287297
RPGRIP1L	0.287197
ERCC4	0.287163
CREBBP	0.287148
TSPEAR	0.287057
SEC23B	0.286872
NLRP6	0.286855
SPIRE1	0.286655
PARP11	0.286541
RMI1	0.286485
NMNAT3	0.28641
CASZ1	0.286379
CPLX1	0.286362
AKAP11	0.286214
PCDHGB5	0.286183
GRHL2	0.286053
ZNF615	0.286018
FKTN	0.285831
SH3BGR	0.285827
ZNF619	0.285822
ITFG1	0.285656
POFUT1	0.285623
LCORL	0.285591
KIAA0040	0.285315
SLF2	0.285302
GRID2IP	0.285263
SMC1A	0.285135
CACNA1I	0.285118
AATK	0.285011
WDR44	0.284999
MORN4	0.284762
CYP4F22	0.284745
AP1AR	0.284696
COG2	0.284688
ZNF597	0.284633
KLHL28	0.284418
PCDHAC2	0.284394
SAP30L	0.284386
TTPA	0.284071
TIMELESS	0.28407
CCT2	0.283815
ZNF536	0.283794
CAB39L	0.283733
ZNF740	0.283726
PLXNA3	0.283719
VEZT	0.283628
FAM241A	0.283435
AVL9	0.283402
LAMA5	0.283361
TMEM97	0.283311
IKBKB	0.283078
MDH1B	0.282841
NR4A2	0.282765
SRXN1	0.28258
STK36	0.282548
SPTSSB	0.282427
OR4D6	0.282406
APLP1	0.282314
ARFIP1	0.282257
NGRN	0.282235
ENHO	0.282132
SLC30A9	0.281788
TNRC18	0.281653
TMEM63C	0.281647
PIAS3	0.281503
FSCN2	0.281205
GNS	0.281063
PNMA1	0.281008
AP3M1	0.280868
UHRF1BP1	0.280585
SLC23A1	0.280552
CCDC30	0.280498
FEM1C	0.280415
C16orf70	0.280355
CTTN	0.280274
AREG	0.280105
ZNF214	0.280027
CDH2	0.28001
ANTXR1	0.279509
ZSWIM6	0.278996
ATE1	0.278584
FAM120AOS	0.278447
AGAP1	0.278232
FAM120C	0.278202
MAN1A1	0.278095
SCRN1	0.277802
CENPP	0.277711
NBPF1	0.277648
CPLANE2	0.277577
CPEB3	0.277519
RIN2	0.277507
IMPG1	0.277498
FMO5	0.277484
NOMO2	0.277404
BRCA1	0.277026
CDV3	0.27702
SLC35E2B	0.277014
ZBTB26	0.27692
TNRC6C	0.276634
INTU	0.276587
STAU1	0.276559
DPY19L3	0.276513
FMN2	0.276259
EFR3A	0.275994
BCAS3	0.275854
DYNC1LI2	0.275851
ZKSCAN1	0.275776
GLYR1	0.275737
APAF1	0.275414
HMGCR	0.275323
MMP24	0.275251
ZNF623	0.274916
NCOR1	0.274651
OR14L1P	0.274627
JKAMP	0.27454
SALL3	0.274529
ZNF765	0.274499
GPC3	0.274466
MARCHF8	0.274173
NBPF15	0.274038
SYNJ2BP	0.274026
MAP7	0.274008
NCOA4	0.273973
THRB	0.27382
GOT1L1	0.273675
SP5	0.273565
SLX4IP	0.27354
UQCC1	0.273445
BCLAF3	0.273444
SPOCK3	0.273301
TNFSF4	0.273204
PIGS	0.273053
ENTPD3	0.272926
CNOT6	0.272915
GRIP1	0.272739
TNFSF13	0.272725
GDPD2	0.272563
RAB11FIP4	0.272284
XRRA1	0.272281
GDE1	0.272259
STAM2	0.272211
PARD3B	0.27219
CFAP126	0.272062
LRRN2	0.271794
MAOB	0.271749
SGCD	0.271513
HIF1AN	0.271317
SLC39A11	0.271276
TBC1D12	0.271274
AIG1	0.271222
SASH1	0.271114
NXPE3	0.270939
HDAC11	0.27093
PHLDB2	0.270928
RNF43	0.270888
NIBAN1	0.270787
EXOC7	0.270731
CCDC186	0.27067
VPS52	0.27055
WDR47	0.270408
WFDC10B	0.270381
ELOVL5	0.270357
HSD17B4	0.270322
ZNF611	0.2703
PRRG4	0.270227
CD46	0.270211
RAB19	0.270208
POTEI	0.270119
TACC1	0.27011
FAM102A	0.270019
NDFIP1	0.269779
RMND5B	0.269772
EEA1	0.269338
[truncated: 17,962 more rows]
