# Supplementary material for: Identification of immunological and prognostic value of SHROOM2 in pan-cancer and experimental verification of its role in promoting malignant phenotypes in breast cancer
Source: PeerJ. 2025 Sep 25;13:e20051. doi: 10.7717/peerj.20051 (PMC12476865; doi:10.7717/peerj.20051)
Supplement: Supplemental Information 37 [file peerj-13-20051-s037.xlsx]

## Sheet: Cisplatin
TCGA-D8-A1XO-01	3.10854
TCGA-AN-A0FN-01	2.88159
TCGA-AC-A62X-01	3.16321
TCGA-E2-A14U-01	4.04772
TCGA-E9-A1R3-01	3.54878
TCGA-BH-A18M-01	3.23264
TCGA-E2-A15T-01	3.94013
TCGA-AR-A0TU-01	2.07816
TCGA-EW-A1IX-01	3.64925
TCGA-B6-A408-01	3.56778
TCGA-E2-A1IE-01	4.19323
TCGA-E2-A10E-01	3.37451
TCGA-EW-A3U0-01	3.23281
TCGA-BH-A0H5-01	3.17018
TCGA-E2-A14W-01	3.87438
TCGA-AQ-A04L-01	3.24398
TCGA-BH-A1FD-01	3.27013
TCGA-AR-A0TR-01	4.30267
TCGA-A7-A0CE-01	3.38033
TCGA-AO-A0J8-01	3.56368
TCGA-BH-A1F0-01	3.00034
TCGA-A2-A0SU-01	3.42652
TCGA-AC-A2FF-01	3.1356
TCGA-LL-A6FP-01	4.1455
TCGA-E2-A15S-01	3.93342
TCGA-E2-A14N-01	2.78149
TCGA-D8-A1JK-01	3.29105
TCGA-D8-A3Z6-01	3.82574
TCGA-A8-A06U-01	3.97769
TCGA-A7-A13E-01	3.38965
TCGA-UL-AAZ6-01	4.45593
TCGA-B6-A0I9-01	3.67248
TCGA-A8-A099-01	3.67173
TCGA-OL-A5RY-01	3.37967
TCGA-E9-A1NA-01	3.13136
TCGA-D8-A1XV-01	4.13081
TCGA-BH-A18T-01	3.18803
TCGA-B6-A0RT-01	3.0716
TCGA-A1-A0SJ-01	4.10586
TCGA-E9-A247-01	3.22717
TCGA-C8-A12P-01	3.67545
TCGA-A8-A09X-01	3.63516
TCGA-BH-A1FC-01	3.29758
TCGA-A8-A082-01	3.67625
TCGA-C8-A12M-01	4.09005
TCGA-BH-A1EV-01	3.48
TCGA-C8-A135-01	3.45637
TCGA-WT-AB44-01	3.79952
TCGA-A7-A3J0-01	4.472
TCGA-E9-A1R0-01	3.46785
TCGA-B6-A0IJ-01	3.00778
TCGA-LL-A441-01	3.52954
TCGA-A2-A3XT-01	3.42066
TCGA-D8-A27I-01	3.56656
TCGA-A8-A094-01	3.59625
TCGA-A2-A1G6-01	3.16093
TCGA-BH-A0GY-01	3.21037
TCGA-E2-A1B0-01	3.4923
TCGA-E9-A1RH-01	2.92632
TCGA-C8-A1HG-01	3.46063
TCGA-A1-A0SB-01	3.29938
TCGA-A7-A0DC-01	3.91266
TCGA-A7-A3IZ-01	3.62484
TCGA-LL-A5YL-01	3.41339
TCGA-BH-A0DI-01	3.36017
TCGA-E2-A1B1-01	3.34149
TCGA-BH-A0H3-01	2.98209
TCGA-D8-A27K-01	3.32294
TCGA-A2-A04U-01	2.50459
TCGA-AO-A0J6-01	3.18846
TCGA-BH-A0E2-01	3.48792
TCGA-E2-A1L8-01	3.40327
TCGA-OL-A5RZ-01	3.6847
TCGA-B6-A1KF-01	3.47742
TCGA-E2-A1L7-01	3.19961
TCGA-B6-A0I6-01	3.00852
TCGA-AN-A0XL-01	3.6945
TCGA-A8-A08B-01	3.25586
TCGA-AC-A6IX-06	3.68974
TCGA-E2-A2P6-01	3.88759
TCGA-E2-A3DX-01	3.70061
TCGA-E2-A159-01	2.88284
TCGA-E9-A1NH-01	3.36355
TCGA-A8-A0A1-01	3.40075
TCGA-D8-A4Z1-01	3.86542
TCGA-AR-A1AS-01	3.44826
TCGA-AR-A24P-01	3.40836
TCGA-A8-A09Z-01	3.53911
TCGA-BH-A0HL-01	3.9235
TCGA-A8-A08X-01	3.22811
TCGA-A8-A09V-01	3.22135
TCGA-D8-A1XT-01	3.46342
TCGA-GM-A4E0-01	3.61002
TCGA-AN-A0XN-01	2.46953
TCGA-A2-A04V-01	3.11974
TCGA-A7-A26I-01	3.87019
TCGA-A2-A3XS-01	3.72488
TCGA-BH-A0BP-01	3.80827
TCGA-AC-A3QQ-01	3.57415
TCGA-AO-A12C-01	3.54232
TCGA-E2-A1IH-01	3.03786
TCGA-BH-A0DS-01	3.34337
TCGA-AN-A0FS-01	2.99495
TCGA-E2-A15F-01	4.06064
TCGA-BH-A0H7-01	3.42482
TCGA-A8-A079-01	3.5952
TCGA-D8-A1XY-01	3.56332
TCGA-AO-A0JD-01	3.17753
TCGA-B6-A0WZ-01	3.63082
TCGA-D8-A1XB-01	3.2514
TCGA-BH-A0BS-01	3.47769
TCGA-BH-A1EX-01	3.61982
TCGA-D8-A1X8-01	3.34388
TCGA-HN-A2OB-01	3.56358
TCGA-B6-A0I1-01	4.25676
TCGA-OL-A97C-01	3.07617
TCGA-E2-A1LK-01	3.53608
TCGA-D8-A1J8-01	2.85088
TCGA-A8-A06P-01	3.79431
TCGA-D8-A3Z5-01	4.0342
TCGA-E2-A152-01	3.41337
TCGA-BH-A0DT-01	3.33574
TCGA-A1-A0SQ-01	4.13977
TCGA-BH-A1FE-01	2.99262
TCGA-BH-A0BR-01	3.81015
TCGA-BH-A18V-01	3.06908
TCGA-GM-A3XN-01	3.69353
TCGA-A8-A09B-01	3.55864
TCGA-PL-A8LY-01	3.19833
TCGA-E2-A10A-01	3.39777
TCGA-A7-A6VV-01	2.951
TCGA-BH-A0BW-01	3.57116
TCGA-AN-A04A-01	3.32308
TCGA-OL-A66P-01	3.70006
TCGA-A2-A0SV-01	3.5677
TCGA-E2-A1LG-01	3.10813
TCGA-E2-A1LL-01	2.36085
TCGA-A2-A0ET-01	3.96438
TCGA-B6-A0RI-01	3.09907
TCGA-BH-A0GZ-01	3.31771
TCGA-A2-A25A-01	3.09396
TCGA-A8-A06N-01	4.30952
TCGA-EW-A1J5-01	3.45226
TCGA-D8-A27V-01	3.32631
TCGA-A2-A0ST-01	3.00054
TCGA-A2-A0CT-01	3.40931
TCGA-AR-A0TT-01	3.25442
TCGA-LL-A8F5-01	3.38666
TCGA-AN-A0FW-01	3.52091
TCGA-BH-A18U-01	3.36502
TCGA-E9-A248-01	3.29471
TCGA-A2-A0CU-01	4.31982
TCGA-BH-A0HY-01	4.02069
TCGA-D8-A1XG-01	3.95933
TCGA-BH-A204-01	3.55256
TCGA-AR-A0U4-01	2.97088
TCGA-E2-A14S-01	3.72819
TCGA-D8-A1JS-01	4.05181
TCGA-C8-A1HK-01	3.41996
TCGA-AR-A250-01	3.27232
TCGA-EW-A1PB-01	2.76703
TCGA-AC-A2B8-01	3.18914
TCGA-A8-A08I-01	3.29939
TCGA-BH-A18V-06	3.23429
TCGA-LL-A6FQ-01	3.46062
TCGA-A1-A0SP-01	2.57985
TCGA-LL-A442-01	3.98298
TCGA-A2-A3XU-01	3.65482
TCGA-A2-A25B-01	3.07506
TCGA-AO-A1KT-01	3.59235
TCGA-B6-A1KN-01	4.33369
TCGA-LL-A5YP-01	3.29307
TCGA-AR-A1AU-01	3.91242
TCGA-A7-A26J-01	3.3186
TCGA-E9-A245-01	4.38733
TCGA-BH-A42T-01	3.77439
TCGA-A2-A0EM-01	3.07271
TCGA-PE-A5DC-01	4.10805
TCGA-A7-A13D-01	3.2543
TCGA-BH-A0HK-01	3.33678
TCGA-B6-A0IP-01	3.21335
TCGA-D8-A1XA-01	3.93419
TCGA-D8-A1X5-01	3.39141
TCGA-D8-A27L-01	3.43242
TCGA-D8-A1JJ-01	3.15975
TCGA-A2-A1G1-01	3.12862
TCGA-E2-A1IL-01	3.89539
TCGA-A7-A4SB-01	4.37238
TCGA-A7-A13H-01	3.76256
TCGA-BH-A0AY-01	3.31417
TCGA-A8-A075-01	3.3079
TCGA-E2-A158-01	3.35745
TCGA-BH-A0B4-01	3.71812
TCGA-BH-A0DV-01	3.25435
TCGA-A2-A0EP-01	3.39291
TCGA-EW-A1PE-01	3.84763
TCGA-LL-A73Z-01	3.13888
TCGA-AR-A1AJ-01	3.11501
TCGA-E9-A227-01	3.32266
TCGA-AO-A0JB-01	3.38018
TCGA-A8-A09N-01	4.03015
TCGA-E2-A15A-01	3.74552
TCGA-A8-A08A-01	3.4726
TCGA-AC-A5XS-01	3.37327
TCGA-BH-A209-01	2.78902
TCGA-AR-A24S-01	2.75997
TCGA-A7-A26E-01	3.00012
TCGA-EW-A1P6-01	3.44265
TCGA-C8-A1HM-01	3.17758
TCGA-OL-A6VQ-01	3.72484
TCGA-E2-A1B5-01	3.45794
TCGA-A2-A0CV-01	3.40543
TCGA-5L-AAT1-01	3.08363
TCGA-B6-A0X4-01	4.3335
TCGA-E2-A105-01	3.96718
TCGA-AC-A3HN-01	3.48993
TCGA-A1-A0SO-01	2.54937
TCGA-E2-A10B-01	3.81103
TCGA-A1-A0SH-01	3.33952
TCGA-E9-A2JS-01	4.25102
TCGA-A2-A04R-01	4.03861
TCGA-C8-A12Q-01	3.78253
TCGA-AN-A0FT-01	3.452
TCGA-4H-AAAK-01	3.35569
TCGA-E2-A15M-01	2.94802
TCGA-A8-A08H-01	2.75727
TCGA-C8-A273-01	3.36962
TCGA-BH-A0DE-01	3.75811
TCGA-C8-A12U-01	4.19423
TCGA-A2-A0EO-01	3.28476
TCGA-AC-A6IW-01	3.03004
TCGA-LL-A50Y-01	3.60554
TCGA-A7-A0DA-01	3.02206
TCGA-GM-A2DL-01	2.89641
TCGA-E9-A244-01	2.86774
TCGA-E2-A15C-01	3.55843
TCGA-BH-A0BT-01	3.00894
TCGA-BH-A0E9-01	3.80643
TCGA-BH-A18I-01	3.13397
TCGA-BH-A0HI-01	3.51223
TCGA-A2-A0CZ-01	3.37335
TCGA-D8-A1X9-01	3.72246
TCGA-BH-A18R-01	3.38592
TCGA-AO-A12B-01	3.72822
TCGA-BH-A0B3-01	2.87151
TCGA-C8-A8HP-01	4.51185
TCGA-AR-A1AM-01	3.67308
TCGA-A2-A4S0-01	4.75393
TCGA-AO-A126-01	3.22824
TCGA-AR-A5QN-01	3.78586
TCGA-A8-A08F-01	3.33357
TCGA-PE-A5DE-01	3.70245
TCGA-A8-A076-01	3.69377
TCGA-A2-A3XZ-01	3.95357
TCGA-AR-A256-01	3.10556
TCGA-BH-A0DG-01	3.54491
TCGA-C8-A26Z-01	4.16094
TCGA-BH-A0HW-01	4.49103
TCGA-A1-A0SD-01	3.80671
TCGA-A2-A0CX-01	3.34651
TCGA-AO-A03R-01	3.49533
TCGA-PL-A8LZ-01	2.96591
TCGA-BH-A1F8-01	3.56376
TCGA-BH-A0BZ-01	3.38417
TCGA-AC-A8OP-01	4.17026
TCGA-GI-A2C9-01	3.159
TCGA-AO-A125-01	3.9126
TCGA-EW-A1OZ-01	3.78802
TCGA-BH-A0C0-01	3.42102
TCGA-AN-A03Y-01	3.67046
TCGA-D8-A145-01	3.56701
TCGA-OL-A66I-01	3.07664
TCGA-OL-A5S0-01	3.15925
TCGA-B6-A0I5-01	3.32051
TCGA-Z7-A8R6-01	3.21292
TCGA-LD-A9QF-01	3.58992
TCGA-C8-A134-01	3.06769
TCGA-AN-A0XT-01	3.97939
TCGA-BH-A0HA-01	3.3681
TCGA-AR-A251-01	3.43343
TCGA-C8-A26V-01	3.52119
TCGA-OL-A5D7-01	3.26389
TCGA-E2-A1IU-01	3.9355
TCGA-AN-A0XO-01	3.7711
TCGA-AN-A0AR-01	3.02617
TCGA-E2-A1IO-01	3.57322
TCGA-D8-A27H-01	3.53744
TCGA-A7-A56D-01	3.2297
TCGA-GM-A3XL-01	3.22654
TCGA-BH-A0DX-01	3.58142
TCGA-A2-A4RX-01	3.27148
TCGA-B6-A0X1-01	3.56463
TCGA-S3-AA0Z-01	3.33115
TCGA-BH-A1FH-01	3.3024
TCGA-AR-A24W-01	3.69093
TCGA-A8-A06T-01	3.74599
TCGA-B6-A0RM-01	4.12567
TCGA-A2-A04N-01	3.32921
TCGA-E9-A226-01	3.15992
TCGA-BH-A0BJ-01	3.7012
TCGA-E2-A10C-01	3.78495
TCGA-BH-A5IZ-01	3.70348
TCGA-E9-A1RD-01	3.66398
TCGA-AC-A5XU-01	3.84064
TCGA-E2-A576-01	3.78919
TCGA-E9-A295-01	3.3464
TCGA-LD-A74U-01	3.58024
TCGA-E2-A570-01	3.24013
TCGA-E9-A1NF-01	3.19811
TCGA-E9-A1R4-01	4.17242
TCGA-B6-A409-01	3.21077
TCGA-EW-A423-01	3.96896
TCGA-OL-A6VO-01	2.62568
TCGA-EW-A6SD-01	3.87875
TCGA-GM-A2DH-01	2.96467
TCGA-LL-A5YM-01	3.68479
TCGA-BH-A0H6-01	3.45992
TCGA-E9-A1N8-01	2.86176
TCGA-AR-A24Z-01	3.49441
TCGA-A7-A4SD-01	3.02762
TCGA-AR-A0U0-01	2.63561
TCGA-BH-A203-01	3.41449
TCGA-E2-A1IK-01	4.04971
TCGA-D8-A13Y-01	3.59797
TCGA-AR-A1AX-01	3.52277
TCGA-E9-A1N9-01	2.92227
TCGA-C8-A1HN-01	3.43857
TCGA-A2-A0YC-01	3.63289
TCGA-A2-A0CL-01	2.97997
TCGA-D8-A1JA-01	3.14631
TCGA-D8-A1XM-01	3.34442
TCGA-A2-A04X-01	3.40982
TCGA-AO-A12A-01	3.45789
TCGA-E2-A1BC-01	3.60288
TCGA-A2-A25F-01	2.66744
TCGA-EW-A2FV-01	3.34847
TCGA-C8-A132-01	3.61998
TCGA-AN-A0AT-01	3.07691
TCGA-AC-A3QP-01	3.30858
TCGA-E9-A1R6-01	4.19199
TCGA-C8-A27B-01	2.55541
TCGA-E2-A14P-01	3.43999
TCGA-LL-A7SZ-01	3.84614
TCGA-BH-A0BO-01	3.51579
TCGA-BH-A0HX-01	3.82414
TCGA-A1-A0SF-01	3.62385
TCGA-BH-A0B9-01	2.62666
TCGA-D8-A1JG-01	3.63123
TCGA-D8-A1JN-01	4.05096
TCGA-A8-A06Z-01	4.57931
TCGA-A2-A0YD-01	3.13011
TCGA-D8-A1JB-01	3.8921
TCGA-JL-A3YX-01	3.76186
TCGA-A1-A0SK-01	2.6453
TCGA-AO-A03P-01	3.26111
TCGA-E2-A1LA-01	3.69985
TCGA-AN-A0FJ-01	2.21661
TCGA-LL-A7T0-01	3.72663
TCGA-D8-A141-01	3.14998
TCGA-BH-A0HB-01	3.26018
TCGA-C8-A12Z-01	3.67337
TCGA-A8-A08S-01	3.54468
TCGA-S3-AA10-01	2.93973
TCGA-E9-A22G-01	2.84219
TCGA-C8-A1HE-01	3.74524
TCGA-E2-A2P5-01	3.34851
TCGA-AO-A0J9-01	3.06766
TCGA-AR-A1AK-01	3.59347
TCGA-C8-A27A-01	3.87126
TCGA-E9-A5UP-01	4.7769
TCGA-A2-A0T2-01	3.65202
TCGA-BH-A0C3-01	3.55741
TCGA-E2-A1IG-01	3.56933
TCGA-C8-A1HL-01	3.42877
TCGA-BH-A208-01	3.14397
TCGA-A2-A3KD-01	4.17981
TCGA-A2-A0YK-01	3.39552
TCGA-BH-A1FR-01	4.03195
TCGA-BH-A18J-01	3.26849
TCGA-B6-A0WY-01	3.27093
TCGA-AR-A24M-01	2.86716
TCGA-E9-A1NI-01	3.28089
TCGA-A8-A093-01	3.50476
TCGA-AC-A6NO-01	3.69107
TCGA-A8-A09M-01	3.88178
TCGA-EW-A1OV-01	2.81432
TCGA-C8-A278-01	3.2303
TCGA-AR-A1AP-01	3.46815
TCGA-E2-A1LS-01	3.64335
TCGA-A8-A09G-01	4.23327
TCGA-A8-A09R-01	4.43569
TCGA-GM-A5PX-01	3.14094
TCGA-E2-A1BD-01	3.55163
TCGA-E9-A1R2-01	4.14974
TCGA-AC-A62Y-01	3.36314
TCGA-AC-A2FO-01	3.34745
TCGA-AR-A1AY-01	2.93623
TCGA-AR-A2LN-01	3.45353
TCGA-D8-A27W-01	3.40794
TCGA-OL-A66O-01	3.53828
TCGA-BH-A0HU-01	3.37934
TCGA-AR-A1AH-01	2.57918
TCGA-A8-A081-01	3.79823
TCGA-C8-A8HQ-01	3.55203
TCGA-A2-A04Y-01	3.58846
TCGA-GM-A2DB-01	3.76186
TCGA-E9-A3Q9-01	3.62468
TCGA-A8-A09I-01	3.52154
TCGA-A8-A07L-01	3.50201
TCGA-A2-A3XV-01	4.15175
TCGA-AR-A0TY-01	3.56084
TCGA-LL-A6FR-01	2.95982
TCGA-A2-A0CW-01	3.83181
TCGA-E2-A14O-01	3.51264
TCGA-D8-A1J9-01	3.638
TCGA-A2-A0CQ-01	3.42258
TCGA-A8-A08Z-01	2.9728
TCGA-AC-A2FE-01	3.54128
TCGA-AO-A03N-01	3.25466
TCGA-EW-A2FW-01	3.73417
TCGA-AR-A2LL-01	3.72561
TCGA-AR-A24Q-01	2.60797
TCGA-AO-A0J3-01	3.98817
TCGA-AR-A2LK-01	3.39543
TCGA-A8-A08J-01	3.62708
TCGA-A2-A0YF-01	3.51862
TCGA-BH-A0AZ-01	3.31654
TCGA-E9-A22B-01	3.78595
TCGA-AC-A3W5-01	3.62714
TCGA-BH-A0C1-01	3.29551
TCGA-AN-A0XU-01	2.83373
TCGA-B6-A0RQ-01	3.50432
TCGA-D8-A1JL-01	3.05134
TCGA-D8-A1Y0-01	3.64907
TCGA-E9-A229-01	3.14909
TCGA-A8-A07I-01	3.55074
TCGA-OL-A5RU-01	3.94368
TCGA-AR-A5QP-01	3.33592
TCGA-D8-A1XZ-01	2.82692
TCGA-EW-A1PC-01	3.3761
TCGA-AO-A0J2-01	3.7451
TCGA-E2-A1LB-01	4.0738
TCGA-5T-A9QA-01	3.73258
TCGA-B6-A40C-01	3.5044
TCGA-A7-A0CH-01	3.20087
TCGA-E2-A9RU-01	3.19906
TCGA-A2-A0D2-01	2.50865
TCGA-BH-A1FE-06	3.03175
TCGA-AC-A8OR-01	4.12837
TCGA-S3-A6ZH-01	3.7293
TCGA-E2-A14Z-01	3.18526
TCGA-E2-A1IF-01	3.42552
TCGA-D8-A27G-01	3.5213
TCGA-EW-A1PH-01	3.2089
TCGA-E2-A14Y-01	3.10261
TCGA-WT-AB41-01	3.48714
TCGA-AO-A1KQ-01	3.63977
TCGA-D8-A1JU-01	3.08682
TCGA-BH-A0DL-01	2.7192
TCGA-E2-A56Z-01	4.10303
TCGA-A7-A0D9-01	4.11376
TCGA-BH-A0DO-01	3.77379
TCGA-A2-A259-01	3.49758
TCGA-AN-A0XP-01	3.64592
TCGA-BH-A202-01	3.73526
TCGA-A2-A0YJ-01	3.33345
TCGA-B6-A0RH-01	2.95428
TCGA-D8-A1XD-01	3.69856
TCGA-A2-A0T7-01	3.58943
TCGA-AC-A2FG-01	3.58517
TCGA-BH-AB28-01	3.57018
TCGA-B6-A0RE-01	3.49874
TCGA-D8-A1JP-01	3.13952
TCGA-S3-A6ZF-01	3.90107
TCGA-AC-A3YJ-01	3.8866
TCGA-A2-A0YI-01	3.4393
TCGA-AN-A04C-01	3.51238
TCGA-B6-A0RO-01	3.77329
TCGA-A2-A0SX-01	2.95993
TCGA-E2-A14R-01	3.09307
TCGA-A7-A0DB-01	3.45404
TCGA-EW-A1OX-01	4.14525
TCGA-A7-A26F-01	3.24747
TCGA-AC-A2QH-01	2.11687
TCGA-AO-A1KR-01	3.38143
TCGA-BH-A1ES-01	3.532
TCGA-B6-A0IE-01	3.44128
TCGA-EW-A1P5-01	3.82076
TCGA-E9-A5UO-01	4.72354
TCGA-HN-A2NL-01	2.60956
TCGA-GM-A2DN-01	3.37819
TCGA-C8-A12V-01	2.69039
TCGA-EW-A1J2-01	3.36268
TCGA-AR-A1AR-01	2.79239
TCGA-PL-A8LV-01	4.13077
TCGA-D8-A1JF-01	3.58543
TCGA-AC-A23E-01	2.87376
TCGA-BH-A0DH-01	3.23818
TCGA-C8-A12Y-01	3.23992
TCGA-BH-A0BG-01	2.85077
TCGA-BH-A18H-01	4.04042
TCGA-D8-A1JD-01	3.05052
TCGA-E9-A228-01	3.94999
TCGA-E9-A3HO-01	3.40915
TCGA-A2-A0EV-01	3.60147
TCGA-BH-A0EI-01	3.59034
TCGA-AN-A0XW-01	3.12902
TCGA-A8-A09A-01	3.51472
TCGA-A1-A0SG-01	3.8545
TCGA-BH-A1F6-01	3.52972
TCGA-E9-A249-01	3.40322
TCGA-BH-A1F2-01	3.41122
TCGA-A8-A096-01	3.02067
TCGA-AR-A1AI-01	2.5755
TCGA-AC-A3BB-01	3.51378
TCGA-BH-A0WA-01	3.1259
TCGA-AQ-A1H3-01	3.33223
TCGA-BH-A0E7-01	3.74156
TCGA-BH-A0RX-01	2.79729
TCGA-AO-A03U-01	3.80164
TCGA-AR-A24L-01	3.63482
TCGA-E2-A1IJ-01	3.38946
TCGA-E2-A150-01	2.9525
TCGA-E2-A15H-01	4.15014
TCGA-BH-A0E0-01	3.3377
TCGA-A2-A0D1-01	3.2783
TCGA-A8-A09D-01	3.43186
TCGA-AQ-A1H2-01	3.23081
TCGA-D8-A1JH-01	3.58227
TCGA-GM-A3NW-01	4.20407
TCGA-A7-A0CD-01	4.00749
TCGA-A7-A2KD-01	3.69816
TCGA-AO-A03L-01	3.33592
TCGA-AR-A2LR-01	2.50997
TCGA-E2-A14T-01	4.48807
TCGA-AR-A24U-01	3.77045
TCGA-BH-A28Q-01	3.33355
TCGA-C8-A3M7-01	3.34639
TCGA-BH-A0EE-01	3.60272
TCGA-3C-AALK-01	3.86683
TCGA-EW-A1OW-01	2.68104
TCGA-E2-A108-01	3.29616
TCGA-A2-A0D4-01	4.13764
TCGA-E9-A1RA-01	3.64694
TCGA-V7-A7HQ-01	3.66619
TCGA-AR-A24X-01	3.19041
TCGA-D8-A73X-01	3.32057
TCGA-BH-A0W4-01	3.57351
TCGA-BH-A1ET-01	3.49049
TCGA-BH-A0C7-01	3.273
TCGA-LD-A7W5-01	3.28963
TCGA-D8-A1XK-01	2.11262
TCGA-A2-A0T4-01	3.38687
TCGA-AN-A0FX-01	3.32561
TCGA-A2-A0D3-01	3.4827
TCGA-D8-A1XS-01	3.31286
TCGA-C8-A138-01	3.18712
TCGA-AR-A24R-01	3.62151
TCGA-BH-A2L8-01	3.25805
TCGA-E2-A14V-01	3.29278
TCGA-AO-A0JE-01	3.10314
TCGA-A8-A06O-01	3.62723
TCGA-AO-A0J4-01	3.1097
TCGA-EW-A1P3-01	3.44114
TCGA-B6-A0WT-01	3.48674
TCGA-C8-A26W-01	3.04216
TCGA-AN-A041-01	3.47203
TCGA-D8-A1Y3-01	2.94312
TCGA-B6-A40B-01	4.03583
TCGA-B6-A1KI-01	4.05896
TCGA-A8-A090-01	3.71216
TCGA-BH-A0B6-01	3.26919
TCGA-A8-A09W-01	3.18327
TCGA-AO-A03M-01	3.40133
TCGA-E2-A1L6-01	3.67111
TCGA-AR-A0TQ-01	3.69349
TCGA-B6-A0RP-01	3.22342
TCGA-AN-A0FK-01	3.77353
TCGA-E9-A22D-01	3.50119
TCGA-BH-A18L-01	3.971
TCGA-E9-A1RG-01	3.75945
TCGA-D8-A146-01	3.86901
TCGA-AO-A0JL-01	3.47237
TCGA-EW-A6SB-01	2.7646
TCGA-3C-AAAU-01	4.76028
TCGA-GM-A2DF-01	3.59653
TCGA-E2-A15J-01	3.62489
TCGA-EW-A424-01	3.69925
TCGA-A8-A07Z-01	3.98409
TCGA-BH-A0BF-01	3.216
TCGA-E2-A154-01	3.62944
TCGA-A8-A08T-01	3.2799
TCGA-A8-A085-01	3.94775
TCGA-EW-A1P4-01	3.1377
TCGA-EW-A1J1-01	4.10976
TCGA-A8-A084-01	3.25371
TCGA-E9-A1R7-01	3.6641
TCGA-AO-A0JA-01	3.26932
TCGA-A2-A1G4-01	3.79363
TCGA-C8-A12K-01	2.56183
TCGA-A2-A0CK-01	3.41364
TCGA-A7-A4SE-01	3.35575
TCGA-C8-A274-01	3.9977
TCGA-BH-A0B0-01	3.51101
TCGA-BH-A1EY-01	3.82471
TCGA-C8-A12O-01	3.72999
TCGA-BH-A42U-01	3.48281
TCGA-AQ-A04H-01	4.29191
TCGA-A7-A425-01	4.06972
TCGA-AN-A049-01	3.8386
TCGA-A8-A06Y-01	4.16136
TCGA-AR-A2LE-01	4.13648
TCGA-AC-A23G-01	3.4139
TCGA-A7-A5ZV-01	3.20653
TCGA-BH-A0BL-01	3.02297
TCGA-EW-A1PA-01	3.79495
TCGA-E9-A1RC-01	3.76088
TCGA-A2-A1FV-01	3.54778
TCGA-BH-A0AU-01	3.63864
TCGA-LL-A73Y-01	3.60702
TCGA-D8-A1JC-01	3.896
TCGA-E2-A1B4-01	3.50077
TCGA-A2-A0EW-01	3.51198
TCGA-E9-A1NG-01	2.89427
TCGA-AR-A1AL-01	3.27292
TCGA-LD-A7W6-01	3.59647
TCGA-JL-A3YW-01	3.61676
TCGA-A2-A1FX-01	3.57758
TCGA-BH-A1FJ-01	3.31551
TCGA-A2-A0EX-01	3.31815
TCGA-A2-A0CM-01	2.97606
TCGA-GM-A2DA-01	3.50947
TCGA-B6-A0X7-01	3.22653
TCGA-AR-A2LQ-01	3.41124
TCGA-W8-A86G-01	4.10367
TCGA-BH-A0HO-01	3.293
TCGA-BH-A1FU-01	3.1468
TCGA-A8-A091-01	4.0812
TCGA-E9-A1N3-01	4.46704
TCGA-AR-A0U2-01	3.53807
TCGA-BH-A0W7-01	3.26754
TCGA-E9-A1R5-01	3.60452
TCGA-3C-AALI-01	4.06935
TCGA-E9-A1RI-01	3.40146
TCGA-A2-A0ER-01	3.64629
TCGA-3C-AALJ-01	4.40169
TCGA-E9-A6HE-01	3.28707
TCGA-A7-A5ZX-01	3.20386
TCGA-BH-A201-01	3.35857
TCGA-A2-A04W-01	4.10456
TCGA-D8-A73W-01	3.98099
TCGA-A7-A3IY-01	3.41051
TCGA-OL-A6VR-01	4.10133
TCGA-EW-A2FR-01	3.388
TCGA-BH-A0HP-01	3.04046
TCGA-AR-A0TP-01	3.10504
TCGA-C8-A12X-01	4.1291
TCGA-D8-A1XJ-01	3.30789
TCGA-AR-A0TZ-01	3.76928
TCGA-EW-A1OY-01	3.66371
TCGA-GM-A2DC-01	4.65912
TCGA-BH-A18N-01	3.76795
TCGA-E9-A1ND-01	3.05231
TCGA-D8-A1XR-01	3.55013
TCGA-A2-A0ES-01	3.45526
TCGA-C8-A1HO-01	3.47092
TCGA-LL-A9Q3-01	4.52145
TCGA-A7-A3J1-01	4.02708
TCGA-AC-A5EH-01	3.47196
TCGA-E2-A15O-01	3.54998
TCGA-AC-A3W6-01	3.4433
TCGA-AN-A0FD-01	3.3799
TCGA-BH-A0BM-01	3.62911
TCGA-E9-A22H-01	3.09387
TCGA-EW-A1IY-01	2.84983
TCGA-E9-A3X8-01	3.41711
TCGA-AR-A24K-01	2.7364
TCGA-S3-AA11-01	3.9989
TCGA-EW-A6SA-01	3.91677
TCGA-A2-A0CP-01	3.52728
TCGA-B6-A0RU-01	2.65813
TCGA-B6-A0RS-01	3.43296
TCGA-A1-A0SN-01	3.4961
TCGA-EW-A1IZ-01	3.17799
TCGA-A7-A13F-01	3.89625
TCGA-D8-A1JT-01	3.73892
TCGA-D8-A1JM-01	3.16415
TCGA-BH-A0BQ-01	3.31523
TCGA-BH-A0EA-01	3.6624
TCGA-BH-A0BA-01	3.97432
TCGA-EW-A6SC-01	3.25577
TCGA-OL-A5DA-01	3.39997
TCGA-A2-A0T1-01	3.65222
TCGA-AO-A0JC-01	2.86893
TCGA-EW-A2FS-01	3.85771
TCGA-A8-A09K-01	4.04878
TCGA-E2-A107-01	3.8919
TCGA-A7-A6VY-01	3.08681
TCGA-E2-A14Q-01	3.82792
TCGA-E2-A15A-06	3.3499
TCGA-B6-A0IB-01	3.52039
TCGA-A8-A06Q-01	4.0927
TCGA-GM-A2DK-01	4.25745
TCGA-5L-AAT0-01	3.31054
TCGA-A7-A4SC-01	4.82092
TCGA-A2-A0CR-01	3.17685
TCGA-AC-A2QJ-01	2.75462
TCGA-AN-A03X-01	2.96302
TCGA-AN-A0FL-01	3.59906
TCGA-BH-A18P-01	3.06478
TCGA-AC-A3YI-01	3.46874
TCGA-A2-A0SY-01	3.47728
TCGA-GM-A2DM-01	3.85835
TCGA-D8-A1XF-01	3.99259
TCGA-BH-A1FM-01	2.81097
TCGA-BH-A0HN-01	4.01449
TCGA-AN-A0FV-01	3.55212
TCGA-B6-A0X0-01	3.58403
TCGA-AO-A03T-01	3.88829
TCGA-S3-AA15-01	3.48592
TCGA-AO-A12D-01	3.82394
TCGA-BH-A0DK-01	3.18873
TCGA-AO-A124-01	2.61521
TCGA-E2-A15R-01	4.15608
TCGA-D8-A1Y1-01	3.05052
TCGA-A2-A04T-01	3.11131
TCGA-UU-A93S-01	3.86336
TCGA-A2-A0T6-01	3.22857
TCGA-E2-A10F-01	3.4759
TCGA-EW-A1IW-01	3.57732
TCGA-E9-A1NC-01	3.12653
TCGA-AC-A3TM-01	3.24894
TCGA-E9-A1QZ-01	3.31309
TCGA-A8-A09C-01	3.39326
TCGA-D8-A73U-01	3.50135
TCGA-A8-A07E-01	3.22878
TCGA-AC-A3TN-01	3.91997
TCGA-AO-A0JF-01	3.1149
TCGA-E2-A153-01	3.28655
TCGA-BH-A0B5-01	3.50844
TCGA-A8-A07W-01	3.90386
TCGA-BH-A0B8-01	3.51888
TCGA-BH-A0B1-01	3.92807
TCGA-BH-A1FN-01	2.5834
TCGA-D8-A147-01	3.12876
TCGA-PL-A8LX-01	4.1309
TCGA-E9-A1N4-01	3.32513
TCGA-BH-A18F-01	3.3592
TCGA-D8-A27F-01	3.30879
TCGA-A8-A0AB-01	3.35011
TCGA-AR-A0TS-01	3.55338
TCGA-BH-A0H9-01	3.82521
TCGA-A8-A07U-01	3.59578
TCGA-E2-A14X-01	3.34394
TCGA-C8-A131-01	3.14208
TCGA-BH-A1FL-01	3.41166
TCGA-C8-A12W-01	3.0388
TCGA-AC-A7VC-01	2.11924
TCGA-AO-A12E-01	3.57807
TCGA-E2-A1LI-01	2.59822
TCGA-AC-A2BM-01	3.56056
TCGA-A8-A07R-01	2.86262
TCGA-BH-A0AW-01	3.25206
TCGA-A7-A426-01	3.60949
TCGA-BH-A6R8-01	3.90315
TCGA-AC-A8OS-01	4.00147
TCGA-A2-A04Q-01	2.89098
TCGA-A7-A26H-01	3.32374
TCGA-A7-A4SF-01	3.80186
TCGA-D8-A27M-01	3.51247
TCGA-E9-A1NE-01	3.46601
TCGA-E2-A573-01	2.91331
TCGA-C8-A1HI-01	3.72389
TCGA-A7-A6VW-01	2.80981
TCGA-BH-A0B7-01	3.88836
TCGA-A8-A0A6-01	3.4881
TCGA-AO-A0J5-01	3.21827
TCGA-AO-A12H-01	3.77926
TCGA-E2-A15G-01	3.85163
TCGA-GM-A5PV-01	3.61685
TCGA-E9-A24A-01	3.08036
TCGA-AR-A2LM-01	3.20272
TCGA-E2-A1II-01	2.47234
TCGA-D8-A27P-01	3.40772
TCGA-EW-A1J3-01	3.51822
TCGA-B6-A0I8-01	4.69713
TCGA-AO-A1KS-01	3.23973
TCGA-A2-A4S2-01	3.79329
TCGA-BH-A6R9-01	2.57348
TCGA-BH-A8FZ-01	3.9603
TCGA-AC-A2FK-01	3.57744
TCGA-A2-A0T0-01	2.94365
TCGA-A8-A07S-01	3.57177
TCGA-GM-A2DI-01	3.40557
TCGA-E2-A106-01	4.90423
TCGA-BH-A0E6-01	3.16176
TCGA-AO-A03V-01	4.15695
TCGA-AC-A2BK-01	2.10911
TCGA-AR-A254-01	3.12307
TCGA-AO-A129-01	3.17801
TCGA-BH-A8FY-01	3.97372
TCGA-D8-A143-01	2.18081
TCGA-AC-A3W7-01	3.78673
TCGA-A8-A06X-01	3.28005
TCGA-AR-A255-01	3.56154
TCGA-BH-A0DZ-01	2.82073
TCGA-C8-A12T-01	3.06835
TCGA-AO-A12G-01	3.42003
TCGA-E2-A15L-01	3.40179
TCGA-AN-A0FF-01	3.60618
TCGA-A2-A3XX-01	3.74247
TCGA-EW-A1P8-01	3.1816
TCGA-A8-A097-01	3.39137
TCGA-BH-A0E1-01	3.46562
TCGA-BH-A0HF-01	3.34304
TCGA-E9-A5FL-01	2.85192
TCGA-AR-A1AW-01	2.88153
TCGA-AQ-A0Y5-01	3.38045
TCGA-OK-A5Q2-01	3.52887
TCGA-E2-A1B6-01	2.848
TCGA-A8-A07P-01	3.75822
TCGA-AR-A0TW-01	4.04468
TCGA-E9-A1N6-01	3.73156
TCGA-BH-A1EU-01	3.55718
TCGA-A2-A0EQ-01	2.99301
TCGA-A8-A08C-01	3.24894
TCGA-OL-A5RW-01	3.17643
TCGA-B6-A0WS-01	3.45139
TCGA-BH-A42V-01	3.60263
TCGA-A2-A0YL-01	2.91477
TCGA-B6-A402-01	3.51377
TCGA-A7-A0CJ-01	3.12716
TCGA-E9-A22E-01	2.90666
TCGA-A2-A3Y0-01	2.42553
TCGA-AN-A0FZ-01	3.90693
TCGA-BH-A0DQ-01	3.29568
TCGA-A8-A07J-01	3.39904
TCGA-E9-A54X-01	4.36037
TCGA-B6-A1KC-01	3.6604
TCGA-BH-A18K-01	3.51002
TCGA-A2-A0EU-01	3.44448
TCGA-B6-A0IH-01	3.33914
TCGA-A2-A0EY-01	3.76344
TCGA-AO-A0JJ-01	3.36059
TCGA-C8-A26X-01	3.37507
TCGA-BH-A18Q-01	3.26225
TCGA-A8-A092-01	3.58968
TCGA-S3-AA12-01	3.76648
TCGA-BH-A1EO-01	3.23136
TCGA-A2-A4RW-01	3.52946
TCGA-D8-A142-01	3.53269
TCGA-A2-A0YE-01	3.28824
TCGA-A2-A04P-01	3.6291
TCGA-A2-A0CY-01	3.26868
TCGA-E9-A1RB-01	3.28393
TCGA-A7-A5ZW-01	2.92477
TCGA-E2-A1IN-01	3.20522
TCGA-EW-A6S9-01	3.80729
TCGA-AR-A5QM-01	4.02912
TCGA-AO-A0J7-01	4.04071
TCGA-A2-A3KC-01	3.60699
TCGA-E2-A15D-01	3.30538
TCGA-A2-A0YG-01	3.89312
TCGA-AO-A03O-01	3.23147
TCGA-OL-A66N-01	3.85751
TCGA-B6-A0I2-01	3.25808
TCGA-E2-A572-01	4.03243
TCGA-EW-A1PG-01	3.15767
TCGA-A7-A26G-01	3.0587
TCGA-B6-A0WV-01	3.71353
TCGA-AO-A0JM-01	3.42646
TCGA-D8-A1X7-01	3.57596
TCGA-C8-A3M8-01	4.12878
TCGA-LL-A5YN-01	3.37505
TCGA-B6-A0RG-01	3.85806
TCGA-AC-A3OD-01	3.27761
TCGA-A8-A08O-01	3.61082
TCGA-A8-A07B-01	3.42676
TCGA-A8-A08L-01	3.07344
TCGA-E2-A15I-01	3.78601
TCGA-BH-A0HQ-01	3.65234
TCGA-AR-A24V-01	3.0626
TCGA-EW-A1P1-01	3.30447
TCGA-EW-A3E8-01	3.56806
TCGA-A8-A07O-01	2.87669
TCGA-AN-A04D-01	2.793
TCGA-E9-A2JT-01	2.96854
TCGA-A2-A4S3-01	3.80209
TCGA-AN-A0AK-01	3.10998
TCGA-AO-A1KO-01	3.31639
TCGA-BH-A1ES-06	4.41564
TCGA-AR-A1AV-01	3.81881
TCGA-A2-A0D0-01	2.69528
TCGA-A7-A13G-01	3.86997
TCGA-AC-A2QI-01	3.52727
TCGA-AC-A2FM-01	4.56873
TCGA-B6-A0X5-01	3.68559
TCGA-C8-A12L-01	3.82004
TCGA-AN-A0AS-01	3.58612
TCGA-A8-A0A2-01	3.56262
TCGA-LQ-A4E4-01	4.38477
TCGA-A1-A0SI-01	3.20441
TCGA-BH-A5J0-01	3.48268
TCGA-D8-A1Y2-01	3.3237
TCGA-A7-A3RF-01	4.73796
TCGA-A2-A0T5-01	3.24799
TCGA-BH-A1F5-01	3.4861
TCGA-LD-A66U-01	3.48719
TCGA-E9-A3QA-01	3.12798
TCGA-AO-A12F-01	2.63274
TCGA-A2-A25E-01	3.67539
TCGA-A8-A0A4-01	4.16045
TCGA-EW-A1J6-01	4.20297
TCGA-C8-A8HR-01	3.17744
TCGA-BH-A0BV-01	3.67364
TCGA-D8-A27T-01	3.42391
TCGA-E9-A1RE-01	3.77633
TCGA-A2-A0T3-01	3.58644
TCGA-E2-A15E-01	3.8522
TCGA-E9-A1N5-01	3.53267
TCGA-B6-A0RV-01	3.26935
TCGA-E2-A15P-01	4.20336
TCGA-AC-A3EH-01	3.61287
TCGA-BH-A1FB-01	3.35475
TCGA-A8-A07C-01	2.60306
TCGA-E9-A5FK-01	3.41039
TCGA-A2-A0CO-01	3.8777
TCGA-A8-A0A9-01	3.55932
TCGA-C8-A1HF-01	2.4462
TCGA-AQ-A54O-01	4.05105
TCGA-S3-AA17-01	3.84192
TCGA-MS-A51U-01	3.96642
TCGA-AC-A62V-01	3.64129
TCGA-GI-A2C8-01	3.80033
TCGA-BH-A18S-01	3.88265
TCGA-EW-A1P7-01	3.20346
TCGA-A8-A08P-01	3.21268
TCGA-A8-A095-01	2.94786
TCGA-EW-A1P0-01	3.43146
TCGA-A2-A4S1-01	2.94653
TCGA-AR-A0U3-01	3.93221
TCGA-BH-A0EB-01	3.31805
TCGA-E9-A54Y-01	4.36263
TCGA-D8-A1XU-01	3.94902
TCGA-OL-A66J-01	3.69853
TCGA-EW-A1PD-01	3.70595
TCGA-BH-A0BC-01	3.08
TCGA-AC-A23H-01	3.35185
TCGA-D8-A1XC-01	4.228
TCGA-AN-A0XV-01	3.47494
TCGA-A8-A08G-01	4.10236
TCGA-A2-A1FW-01	3.36452
TCGA-LL-A5YO-01	3.48006
TCGA-E9-A1RF-01	3.48089
TCGA-XX-A899-01	3.71425
TCGA-E2-A15K-06	3.87499
TCGA-AO-A0JI-01	4.41491
TCGA-AN-A0AM-01	3.85085
TCGA-AO-A128-01	3.31767
TCGA-C8-A12N-01	3.22957
TCGA-A7-A6VX-01	3.43935
TCGA-C8-A133-01	4.16726
TCGA-A2-A0CS-01	3.55918
TCGA-E2-A15K-01	3.13527
TCGA-A8-A083-01	3.83414
TCGA-XX-A89A-01	3.51493
TCGA-BH-A28O-01	3.57376
TCGA-B6-A0IC-01	3.85075
TCGA-B6-A401-01	4.07193
TCGA-AN-A0XS-01	3.23674
TCGA-A7-A0CG-01	3.16972
TCGA-A1-A0SM-01	3.31229
TCGA-D8-A27R-01	3.68121
TCGA-GM-A2DD-01	3.74804
TCGA-LL-A740-01	4.1828
TCGA-AR-A24T-01	3.10365
TCGA-BH-A0H0-01	3.98589
TCGA-A8-A09T-01	2.88952
TCGA-B6-A0WW-01	3.54243
TCGA-OL-A66L-01	3.62148
TCGA-A8-A0A7-01	3.37031
TCGA-A7-A4SA-01	3.85995
TCGA-A2-A0EN-01	3.70276
TCGA-B6-A0IO-01	3.74264
TCGA-AC-A8OQ-01	4.112
TCGA-D8-A27E-01	4.39484
TCGA-BH-A8G0-01	3.61133
TCGA-A2-A3XW-01	3.63753
TCGA-BH-A0DP-01	3.32933
TCGA-PE-A5DD-01	4.05579
TCGA-OL-A66K-01	3.70005
TCGA-BH-A1FG-01	4.01738
TCGA-A2-A25D-01	3.54337
TCGA-S3-AA14-01	4.11174
TCGA-LL-A440-01	3.71449
TCGA-A2-A0SW-01	3.49695
TCGA-D8-A1XW-01	3.56031
TCGA-B6-A2IU-01	3.65075
TCGA-GM-A2DO-01	3.32731
TCGA-B6-A0IA-01	3.7
TCGA-C8-A26Y-01	4.19701
TCGA-AN-A0G0-01	3.22576
TCGA-AO-A0JG-01	3.65035
TCGA-E2-A1LH-01	3.52836
TCGA-AN-A0FY-01	2.90673
TCGA-E2-A1L9-01	2.89138
TCGA-BH-A0W5-01	3.39327
TCGA-AQ-A54N-01	3.79654
TCGA-GM-A3NY-01	3.75961
TCGA-A8-A09E-01	3.93713
TCGA-AR-A0TX-01	3.4321
TCGA-AQ-A04J-01	2.9156
TCGA-AR-A2LJ-01	3.38283
TCGA-OL-A66H-01	3.57409
TCGA-AC-A23C-01	3.30233
TCGA-D8-A1XQ-01	3.15109
TCGA-E2-A156-01	3.62554
TCGA-AC-A6IV-01	3.53485
TCGA-E2-A15E-06	4.05204
TCGA-D8-A1X6-01	3.21792
TCGA-A8-A0AD-01	3.3095
TCGA-A8-A07G-01	3.50028
TCGA-C8-A130-01	3.0829
TCGA-AN-A046-01	3.76538
TCGA-E2-A1AZ-01	2.82899
TCGA-B6-A400-01	3.72778
TCGA-Z7-A8R5-01	3.42763
TCGA-E2-A155-01	3.69838
TCGA-E2-A109-01	3.85563
TCGA-BH-A1EN-01	4.53424
TCGA-AR-A1AQ-01	2.78592
TCGA-E2-A574-01	2.89852
TCGA-A2-A1G0-01	3.54057
TCGA-AC-A4ZE-01	4.18628
TCGA-AR-A24O-01	3.22945
TCGA-BH-A0AV-01	2.5841
TCGA-C8-A137-01	3.22638
TCGA-B6-A0RL-01	4.48503
TCGA-OL-A5RV-01	4.23214
TCGA-B6-A0IM-01	3.78417
TCGA-B6-A0IK-01	3.93467
TCGA-B6-A0WX-01	2.76192
TCGA-AR-A24H-01	3.06678
TCGA-B6-A0IQ-01	2.94052
TCGA-D8-A27N-01	3.25067
TCGA-C8-A275-01	3.39065
TCGA-B6-A0IG-01	3.79064
TCGA-E9-A243-01	3.20495
TCGA-D8-A1JE-01	3.40216
TCGA-E2-A1LE-01	3.2586
TCGA-AC-A6IX-01	3.59121
TCGA-A8-A09Q-01	3.47139
TCGA-AN-A0AL-01	3.38646
TCGA-A2-A4RY-01	3.80273
TCGA-AR-A5QQ-01	2.35993
TCGA-D8-A140-01	3.66418
TCGA-A2-A0YH-01	3.18494
TCGA-B6-A3ZX-01	3.54463
TCGA-A1-A0SE-01	3.42885
TCGA-AR-A1AN-01	3.24301
TCGA-A8-A08R-01	3.36675
TCGA-OL-A5RX-01	3.49439
TCGA-AR-A2LO-01	3.57031
TCGA-BH-A0BD-01	3.04395
TCGA-AR-A24N-01	3.13916
TCGA-AR-A2LH-01	3.72033
TCGA-AR-A1AO-01	3.25328
TCGA-BH-A1EW-01	3.78544
TCGA-BH-A0W3-01	3.73901
TCGA-EW-A1PF-01	4.1375
TCGA-S3-A6ZG-01	3.4278
TCGA-E9-A22A-01	3.03002
TCGA-A2-A0YT-01	3.57479
TCGA-B6-A0IN-01	3.46266
TCGA-C8-A1HJ-01	2.16304
TCGA-AQ-A7U7-01	3.50475
TCGA-D8-A1JI-01	4.40144
TCGA-GM-A2D9-01	3.33067
TCGA-A8-A06R-01	3.3002
TCGA-AR-A1AT-01	3.56013
TCGA-AO-A1KP-01	3.6134
TCGA-AN-A0AJ-01	3.13352
TCGA-A8-A07F-01	3.28441
TCGA-GM-A3XG-01	3.61763
TCGA-AR-A0TV-01	3.44514
TCGA-A2-A3XY-01	2.97564
TCGA-BH-A0DD-01	3.43021
TCGA-A2-A1FZ-01	3.49231
TCGA-D8-A13Z-01	3.01846
TCGA-A2-A25C-01	3.31304
TCGA-AN-A0XR-01	3.26946
TCGA-B6-A0RN-01	3.01185
TCGA-AC-A2FB-01	3.55154
TCGA-AC-A7VB-01	4.0041
TCGA-A2-A0YM-01	2.77606
TCGA-OL-A5D8-01	3.95372
TCGA-D8-A1XL-01	3.02458
TCGA-AR-A252-01	3.25936
TCGA-BH-A18G-01	3.32295
TCGA-OL-A5D6-01	4.26399
TCGA-A8-A086-01	3.2789

## Sheet: 5-f
TCGA-D8-A1XO-01	3.39631
TCGA-AN-A0FN-01	3.79199
TCGA-AC-A62X-01	3.05506
TCGA-E2-A14U-01	4.07059
TCGA-E9-A1R3-01	3.08867
TCGA-BH-A18M-01	3.59682
TCGA-E2-A15T-01	4.02806
TCGA-AR-A0TU-01	2.19723
TCGA-EW-A1IX-01	3.8789
TCGA-B6-A408-01	3.48542
TCGA-E2-A1IE-01	4.25568
TCGA-E2-A10E-01	3.48515
TCGA-EW-A3U0-01	3.25187
TCGA-BH-A0H5-01	2.68278
TCGA-E2-A14W-01	4.51247
TCGA-AQ-A04L-01	3.90322
TCGA-BH-A1FD-01	3.43363
TCGA-AR-A0TR-01	3.42198
TCGA-A7-A0CE-01	3.94577
TCGA-AO-A0J8-01	3.18275
TCGA-BH-A1F0-01	2.639
TCGA-A2-A0SU-01	3.98394
TCGA-AC-A2FF-01	3.76625
TCGA-LL-A6FP-01	4.24543
TCGA-E2-A15S-01	4.41431
TCGA-E2-A14N-01	2.333
TCGA-D8-A1JK-01	4.33482
TCGA-D8-A3Z6-01	3.65944
TCGA-A8-A06U-01	3.89511
TCGA-A7-A13E-01	3.77797
TCGA-UL-AAZ6-01	4.53436
TCGA-B6-A0I9-01	3.69131
TCGA-A8-A099-01	2.76414
TCGA-OL-A5RY-01	3.23702
TCGA-E9-A1NA-01	3.58508
TCGA-D8-A1XV-01	4.12941
TCGA-BH-A18T-01	2.59105
TCGA-B6-A0RT-01	2.20416
TCGA-A1-A0SJ-01	5.0804
TCGA-E9-A247-01	4.73789
TCGA-C8-A12P-01	4.02495
TCGA-A8-A09X-01	2.97512
TCGA-BH-A1FC-01	2.78257
TCGA-A8-A082-01	3.94985
TCGA-C8-A12M-01	3.42821
TCGA-BH-A1EV-01	3.59946
TCGA-C8-A135-01	3.969
TCGA-WT-AB44-01	4.96396
TCGA-A7-A3J0-01	3.39828
TCGA-E9-A1R0-01	4.18305
TCGA-B6-A0IJ-01	2.79916
TCGA-LL-A441-01	2.96654
TCGA-A2-A3XT-01	2.21211
TCGA-D8-A27I-01	3.73708
TCGA-A8-A094-01	4.19482
TCGA-A2-A1G6-01	3.78721
TCGA-BH-A0GY-01	3.78738
TCGA-E2-A1B0-01	3.67885
TCGA-E9-A1RH-01	4.75932
TCGA-C8-A1HG-01	3.38119
TCGA-A1-A0SB-01	4.14013
TCGA-A7-A0DC-01	5.76881
TCGA-A7-A3IZ-01	3.61049
TCGA-LL-A5YL-01	3.95118
TCGA-BH-A0DI-01	4.55694
TCGA-E2-A1B1-01	3.73958
TCGA-BH-A0H3-01	3.39513
TCGA-D8-A27K-01	3.40583
TCGA-A2-A04U-01	3.92212
TCGA-AO-A0J6-01	2.63947
TCGA-BH-A0E2-01	3.67203
TCGA-E2-A1L8-01	4.33592
TCGA-OL-A5RZ-01	3.90966
TCGA-B6-A1KF-01	3.8203
TCGA-E2-A1L7-01	3.24342
TCGA-B6-A0I6-01	3.52332
TCGA-AN-A0XL-01	4.26028
TCGA-A8-A08B-01	2.99603
TCGA-AC-A6IX-06	3.27901
TCGA-E2-A2P6-01	4.24916
TCGA-E2-A3DX-01	3.69635
TCGA-E2-A159-01	2.80773
TCGA-E9-A1NH-01	3.53172
TCGA-A8-A0A1-01	3.14112
TCGA-D8-A4Z1-01	3.5819
TCGA-AR-A1AS-01	3.06438
TCGA-AR-A24P-01	3.83219
TCGA-A8-A09Z-01	2.93673
TCGA-BH-A0HL-01	4.64242
TCGA-A8-A08X-01	4.0106
TCGA-A8-A09V-01	3.90716
TCGA-D8-A1XT-01	3.24961
TCGA-GM-A4E0-01	4.17036
TCGA-AN-A0XN-01	3.90047
TCGA-A2-A04V-01	4.30393
TCGA-A7-A26I-01	5.31238
TCGA-A2-A3XS-01	3.18699
TCGA-BH-A0BP-01	4.61803
TCGA-AC-A3QQ-01	5.84326
TCGA-AO-A12C-01	4.22444
TCGA-E2-A1IH-01	3.89677
TCGA-BH-A0DS-01	3.76806
TCGA-AN-A0FS-01	3.56635
TCGA-E2-A15F-01	4.36422
TCGA-BH-A0H7-01	4.74709
TCGA-A8-A079-01	4.24376
TCGA-D8-A1XY-01	4.38225
TCGA-AO-A0JD-01	3.05968
TCGA-B6-A0WZ-01	4.56679
TCGA-D8-A1XB-01	3.76866
TCGA-BH-A0BS-01	3.73929
TCGA-BH-A1EX-01	4.06426
TCGA-D8-A1X8-01	3.19378
TCGA-HN-A2OB-01	4.11218
TCGA-B6-A0I1-01	3.61425
TCGA-OL-A97C-01	4.03061
TCGA-E2-A1LK-01	3.57168
TCGA-D8-A1J8-01	3.87286
TCGA-A8-A06P-01	4.12872
TCGA-D8-A3Z5-01	3.77929
TCGA-E2-A152-01	4.44609
TCGA-BH-A0DT-01	3.6475
TCGA-A1-A0SQ-01	4.47573
TCGA-BH-A1FE-01	3.3864
TCGA-BH-A0BR-01	4.43804
TCGA-BH-A18V-01	2.96526
TCGA-GM-A3XN-01	3.70911
TCGA-A8-A09B-01	3.93589
TCGA-PL-A8LY-01	3.52047
TCGA-E2-A10A-01	3.07866
TCGA-A7-A6VV-01	3.1885
TCGA-BH-A0BW-01	3.56506
TCGA-AN-A04A-01	3.89499
TCGA-OL-A66P-01	4.22838
TCGA-A2-A0SV-01	3.2192
TCGA-E2-A1LG-01	3.41671
TCGA-E2-A1LL-01	4.16477
TCGA-A2-A0ET-01	3.08566
TCGA-B6-A0RI-01	3.74355
TCGA-BH-A0GZ-01	4.9479
TCGA-A2-A25A-01	3.49834
TCGA-A8-A06N-01	3.78862
TCGA-EW-A1J5-01	3.2115
TCGA-D8-A27V-01	3.60519
TCGA-A2-A0ST-01	2.73643
TCGA-A2-A0CT-01	4.4999
TCGA-AR-A0TT-01	3.01442
TCGA-LL-A8F5-01	4.30614
TCGA-AN-A0FW-01	4.03722
TCGA-BH-A18U-01	3.62906
TCGA-E9-A248-01	3.04089
TCGA-A2-A0CU-01	4.85046
TCGA-BH-A0HY-01	4.78863
TCGA-D8-A1XG-01	3.51548
TCGA-BH-A204-01	4.00953
TCGA-AR-A0U4-01	2.80353
TCGA-E2-A14S-01	3.4942
TCGA-D8-A1JS-01	3.30635
TCGA-C8-A1HK-01	4.30798
TCGA-AR-A250-01	4.14636
TCGA-EW-A1PB-01	2.12896
TCGA-AC-A2B8-01	3.62795
TCGA-A8-A08I-01	3.80737
TCGA-BH-A18V-06	2.50155
TCGA-LL-A6FQ-01	3.91221
TCGA-A1-A0SP-01	2.97559
TCGA-LL-A442-01	3.21478
TCGA-A2-A3XU-01	2.84617
TCGA-A2-A25B-01	3.92806
TCGA-AO-A1KT-01	4.40552
TCGA-B6-A1KN-01	3.97168
TCGA-LL-A5YP-01	3.60183
TCGA-AR-A1AU-01	4.22172
TCGA-A7-A26J-01	3.91663
TCGA-E9-A245-01	3.80922
TCGA-BH-A42T-01	3.44483
TCGA-A2-A0EM-01	3.71579
TCGA-PE-A5DC-01	4.48503
TCGA-A7-A13D-01	4.77325
TCGA-BH-A0HK-01	4.08354
TCGA-B6-A0IP-01	3.4534
TCGA-D8-A1XA-01	3.74846
TCGA-D8-A1X5-01	3.67082
TCGA-D8-A27L-01	3.66434
TCGA-D8-A1JJ-01	3.44458
TCGA-A2-A1G1-01	2.59227
TCGA-E2-A1IL-01	3.91752
TCGA-A7-A4SB-01	5.13368
TCGA-A7-A13H-01	3.40063
TCGA-BH-A0AY-01	4.08241
TCGA-A8-A075-01	3.56875
TCGA-E2-A158-01	3.70697
TCGA-BH-A0B4-01	4.50573
TCGA-BH-A0DV-01	4.12978
TCGA-A2-A0EP-01	3.21414
TCGA-EW-A1PE-01	3.34372
TCGA-LL-A73Z-01	3.40951
TCGA-AR-A1AJ-01	2.34984
TCGA-E9-A227-01	3.52441
TCGA-AO-A0JB-01	5.65125
TCGA-A8-A09N-01	3.39439
TCGA-E2-A15A-01	4.23885
TCGA-A8-A08A-01	3.46327
TCGA-AC-A5XS-01	3.64553
TCGA-BH-A209-01	2.27875
TCGA-AR-A24S-01	3.28241
TCGA-A7-A26E-01	4.32501
TCGA-EW-A1P6-01	3.98822
TCGA-C8-A1HM-01	2.89759
TCGA-OL-A6VQ-01	3.85485
TCGA-E2-A1B5-01	3.17031
TCGA-A2-A0CV-01	3.39783
TCGA-5L-AAT1-01	2.78308
TCGA-B6-A0X4-01	3.56226
TCGA-E2-A105-01	4.05494
TCGA-AC-A3HN-01	3.5235
TCGA-A1-A0SO-01	3.88937
TCGA-E2-A10B-01	3.68773
TCGA-A1-A0SH-01	4.6587
TCGA-E9-A2JS-01	4.52828
TCGA-A2-A04R-01	4.41248
TCGA-C8-A12Q-01	4.02085
TCGA-AN-A0FT-01	4.81135
TCGA-4H-AAAK-01	3.70946
TCGA-E2-A15M-01	3.33164
TCGA-A8-A08H-01	3.15715
TCGA-C8-A273-01	4.36765
TCGA-BH-A0DE-01	4.15755
TCGA-C8-A12U-01	3.71117
TCGA-A2-A0EO-01	4.25599
TCGA-AC-A6IW-01	0.681993
TCGA-LL-A50Y-01	3.16005
TCGA-A7-A0DA-01	4.03262
TCGA-GM-A2DL-01	4.08985
TCGA-E9-A244-01	3.43405
TCGA-E2-A15C-01	4.11992
TCGA-BH-A0BT-01	3.98456
TCGA-BH-A0E9-01	3.98849
TCGA-BH-A18I-01	3.58814
TCGA-BH-A0HI-01	3.48823
TCGA-A2-A0CZ-01	4.35027
TCGA-D8-A1X9-01	3.70779
TCGA-BH-A18R-01	3.60943
TCGA-AO-A12B-01	3.47392
TCGA-BH-A0B3-01	3.67641
TCGA-C8-A8HP-01	4.25199
TCGA-AR-A1AM-01	3.46853
TCGA-A2-A4S0-01	3.57089
TCGA-AO-A126-01	4.56409
TCGA-AR-A5QN-01	3.67841
TCGA-A8-A08F-01	3.68624
TCGA-PE-A5DE-01	2.86939
TCGA-A8-A076-01	3.73638
TCGA-A2-A3XZ-01	3.26145
TCGA-AR-A256-01	2.79702
TCGA-BH-A0DG-01	4.35819
TCGA-C8-A26Z-01	4.60885
TCGA-BH-A0HW-01	4.7019
TCGA-A1-A0SD-01	4.02188
TCGA-A2-A0CX-01	3.72921
TCGA-AO-A03R-01	4.48704
TCGA-PL-A8LZ-01	2.49507
TCGA-BH-A1F8-01	4.65631
TCGA-BH-A0BZ-01	3.59767
TCGA-AC-A8OP-01	3.85498
TCGA-GI-A2C9-01	3.50493
TCGA-AO-A125-01	4.08766
TCGA-EW-A1OZ-01	4.15292
TCGA-BH-A0C0-01	2.84882
TCGA-AN-A03Y-01	3.27119
TCGA-D8-A145-01	4.00932
TCGA-OL-A66I-01	2.85556
TCGA-OL-A5S0-01	3.36415
TCGA-B6-A0I5-01	4.22926
TCGA-Z7-A8R6-01	3.58703
TCGA-LD-A9QF-01	3.21165
TCGA-C8-A134-01	3.74666
TCGA-AN-A0XT-01	4.21639
TCGA-BH-A0HA-01	4.07706
TCGA-AR-A251-01	3.32259
TCGA-C8-A26V-01	3.72319
TCGA-OL-A5D7-01	2.46941
TCGA-E2-A1IU-01	3.99022
TCGA-AN-A0XO-01	3.87717
TCGA-AN-A0AR-01	4.21309
TCGA-E2-A1IO-01	4.26442
TCGA-D8-A27H-01	5.01319
TCGA-A7-A56D-01	4.97019
TCGA-GM-A3XL-01	2.19347
TCGA-BH-A0DX-01	3.84962
TCGA-A2-A4RX-01	3.36645
TCGA-B6-A0X1-01	3.13622
TCGA-S3-AA0Z-01	2.18067
TCGA-BH-A1FH-01	4.14398
TCGA-AR-A24W-01	4.23865
TCGA-A8-A06T-01	3.34629
TCGA-B6-A0RM-01	4.15959
TCGA-A2-A04N-01	3.99505
TCGA-E9-A226-01	4.10246
TCGA-BH-A0BJ-01	3.67954
TCGA-E2-A10C-01	4.43939
TCGA-BH-A5IZ-01	3.415
TCGA-E9-A1RD-01	3.48935
TCGA-AC-A5XU-01	4.26356
TCGA-E2-A576-01	4.40922
TCGA-E9-A295-01	4.77469
TCGA-LD-A74U-01	3.42445
TCGA-E2-A570-01	4.27882
TCGA-E9-A1NF-01	4.42218
TCGA-E9-A1R4-01	4.07037
TCGA-B6-A409-01	3.65445
TCGA-EW-A423-01	3.82048
TCGA-OL-A6VO-01	2.37338
TCGA-EW-A6SD-01	3.58465
TCGA-GM-A2DH-01	3.12188
TCGA-LL-A5YM-01	4.59161
TCGA-BH-A0H6-01	4.40112
TCGA-E9-A1N8-01	3.2595
TCGA-AR-A24Z-01	3.25778
TCGA-A7-A4SD-01	2.93223
TCGA-AR-A0U0-01	2.02924
TCGA-BH-A203-01	4.01293
TCGA-E2-A1IK-01	3.50224
TCGA-D8-A13Y-01	3.65691
TCGA-AR-A1AX-01	2.72215
TCGA-E9-A1N9-01	3.94482
TCGA-C8-A1HN-01	3.81242
TCGA-A2-A0YC-01	3.67279
TCGA-A2-A0CL-01	3.19466
TCGA-D8-A1JA-01	3.88354
TCGA-D8-A1XM-01	3.15064
TCGA-A2-A04X-01	3.49579
TCGA-AO-A12A-01	3.56727
TCGA-E2-A1BC-01	3.94043
TCGA-A2-A25F-01	2.74335
TCGA-EW-A2FV-01	3.64608
TCGA-C8-A132-01	3.44285
TCGA-AN-A0AT-01	3.54437
TCGA-AC-A3QP-01	3.42351
TCGA-E9-A1R6-01	4.15255
TCGA-C8-A27B-01	2.2474
TCGA-E2-A14P-01	4.13091
TCGA-LL-A7SZ-01	4.32882
TCGA-BH-A0BO-01	3.72249
TCGA-BH-A0HX-01	4.10355
TCGA-A1-A0SF-01	4.12118
TCGA-BH-A0B9-01	2.04513
TCGA-D8-A1JG-01	3.38022
TCGA-D8-A1JN-01	3.00582
TCGA-A8-A06Z-01	4.09997
TCGA-A2-A0YD-01	3.31727
TCGA-D8-A1JB-01	3.5875
TCGA-JL-A3YX-01	3.60114
TCGA-A1-A0SK-01	3.19744
TCGA-AO-A03P-01	3.78005
TCGA-E2-A1LA-01	4.29056
TCGA-AN-A0FJ-01	3.75871
TCGA-LL-A7T0-01	3.95194
TCGA-D8-A141-01	2.89667
TCGA-BH-A0HB-01	3.96353
TCGA-C8-A12Z-01	3.14958
TCGA-A8-A08S-01	4.04776
TCGA-S3-AA10-01	2.00283
TCGA-E9-A22G-01	3.43319
TCGA-C8-A1HE-01	3.50971
TCGA-E2-A2P5-01	3.6923
TCGA-AO-A0J9-01	4.77436
TCGA-AR-A1AK-01	3.55677
TCGA-C8-A27A-01	3.84011
TCGA-E9-A5UP-01	4.12948
TCGA-A2-A0T2-01	3.85263
TCGA-BH-A0C3-01	4.32247
TCGA-E2-A1IG-01	4.15355
TCGA-C8-A1HL-01	4.24419
TCGA-BH-A208-01	5.14301
TCGA-A2-A3KD-01	3.90529
TCGA-A2-A0YK-01	3.29135
TCGA-BH-A1FR-01	3.33052
TCGA-BH-A18J-01	4.15981
TCGA-B6-A0WY-01	3.62054
TCGA-AR-A24M-01	3.62601
TCGA-E9-A1NI-01	3.92497
TCGA-A8-A093-01	3.89452
TCGA-AC-A6NO-01	3.4417
TCGA-A8-A09M-01	3.86881
TCGA-EW-A1OV-01	3.35639
TCGA-C8-A278-01	3.35108
TCGA-AR-A1AP-01	3.5147
TCGA-E2-A1LS-01	5.46433
TCGA-A8-A09G-01	3.11358
TCGA-A8-A09R-01	3.21585
TCGA-GM-A5PX-01	3.50018
TCGA-E2-A1BD-01	3.85227
TCGA-E9-A1R2-01	3.8706
TCGA-AC-A62Y-01	3.97862
TCGA-AC-A2FO-01	3.73144
TCGA-AR-A1AY-01	3.30729
TCGA-AR-A2LN-01	3.55412
TCGA-D8-A27W-01	4.25902
TCGA-OL-A66O-01	3.93594
TCGA-BH-A0HU-01	3.59268
TCGA-AR-A1AH-01	3.77229
TCGA-A8-A081-01	3.58689
TCGA-C8-A8HQ-01	3.83702
TCGA-A2-A04Y-01	4.32855
TCGA-GM-A2DB-01	4.69064
TCGA-E9-A3Q9-01	4.34244
TCGA-A8-A09I-01	3.45715
TCGA-A8-A07L-01	3.75948
TCGA-A2-A3XV-01	3.97236
TCGA-AR-A0TY-01	4.62823
TCGA-LL-A6FR-01	4.06263
TCGA-A2-A0CW-01	4.21056
TCGA-E2-A14O-01	4.43877
TCGA-D8-A1J9-01	3.79104
TCGA-A2-A0CQ-01	3.6452
TCGA-A8-A08Z-01	3.06734
TCGA-AC-A2FE-01	3.15208
TCGA-AO-A03N-01	5.46885
TCGA-EW-A2FW-01	4.09081
TCGA-AR-A2LL-01	3.53221
TCGA-AR-A24Q-01	4.29472
TCGA-AO-A0J3-01	4.15562
TCGA-AR-A2LK-01	3.72816
TCGA-A8-A08J-01	4.11687
TCGA-A2-A0YF-01	3.85898
TCGA-BH-A0AZ-01	4.23001
TCGA-E9-A22B-01	4.46858
TCGA-AC-A3W5-01	3.57614
TCGA-BH-A0C1-01	3.57931
TCGA-AN-A0XU-01	3.45484
TCGA-B6-A0RQ-01	3.81178
TCGA-D8-A1JL-01	3.12883
TCGA-D8-A1Y0-01	3.28226
TCGA-E9-A229-01	3.59748
TCGA-A8-A07I-01	3.58196
TCGA-OL-A5RU-01	3.25493
TCGA-AR-A5QP-01	3.62148
TCGA-D8-A1XZ-01	3.6708
TCGA-EW-A1PC-01	3.52993
TCGA-AO-A0J2-01	3.30131
TCGA-E2-A1LB-01	3.7349
TCGA-5T-A9QA-01	3.35476
TCGA-B6-A40C-01	3.85674
TCGA-A7-A0CH-01	3.72838
TCGA-E2-A9RU-01	3.95361
TCGA-A2-A0D2-01	3.72531
TCGA-BH-A1FE-06	4.32746
TCGA-AC-A8OR-01	3.3406
TCGA-S3-A6ZH-01	4.39196
TCGA-E2-A14Z-01	2.60738
TCGA-E2-A1IF-01	4.06243
TCGA-D8-A27G-01	3.64778
TCGA-EW-A1PH-01	3.53885
TCGA-E2-A14Y-01	3.22655
TCGA-WT-AB41-01	3.80818
TCGA-AO-A1KQ-01	4.17941
TCGA-D8-A1JU-01	3.68367
TCGA-BH-A0DL-01	2.55824
TCGA-E2-A56Z-01	4.27438
TCGA-A7-A0D9-01	4.46271
TCGA-BH-A0DO-01	3.6891
TCGA-A2-A259-01	3.6011
TCGA-AN-A0XP-01	3.52496
TCGA-BH-A202-01	2.68177
TCGA-A2-A0YJ-01	3.78546
TCGA-B6-A0RH-01	3.9186
TCGA-D8-A1XD-01	4.44629
TCGA-A2-A0T7-01	3.53843
TCGA-AC-A2FG-01	3.82855
TCGA-BH-AB28-01	3.17547
TCGA-B6-A0RE-01	3.02096
TCGA-D8-A1JP-01	3.69519
TCGA-S3-A6ZF-01	3.60436
TCGA-AC-A3YJ-01	3.29775
TCGA-A2-A0YI-01	3.18289
TCGA-AN-A04C-01	4.29909
TCGA-B6-A0RO-01	4.60685
TCGA-A2-A0SX-01	3.03724
TCGA-E2-A14R-01	3.50963
TCGA-A7-A0DB-01	4.46407
TCGA-EW-A1OX-01	3.99224
TCGA-A7-A26F-01	4.77209
TCGA-AC-A2QH-01	4.42963
TCGA-AO-A1KR-01	3.78873
TCGA-BH-A1ES-01	4.06724
TCGA-B6-A0IE-01	4.88042
TCGA-EW-A1P5-01	3.68784
TCGA-E9-A5UO-01	4.42306
TCGA-HN-A2NL-01	2.45442
TCGA-GM-A2DN-01	3.36224
TCGA-C8-A12V-01	2.7351
TCGA-EW-A1J2-01	3.41397
TCGA-AR-A1AR-01	2.41069
TCGA-PL-A8LV-01	3.86774
TCGA-D8-A1JF-01	5.08682
TCGA-AC-A23E-01	3.54459
TCGA-BH-A0DH-01	4.43296
TCGA-C8-A12Y-01	4.18227
TCGA-BH-A0BG-01	3.15847
TCGA-BH-A18H-01	3.55984
TCGA-D8-A1JD-01	3.43588
TCGA-E9-A228-01	4.45297
TCGA-E9-A3HO-01	3.80671
TCGA-A2-A0EV-01	3.98955
TCGA-BH-A0EI-01	4.44234
TCGA-AN-A0XW-01	4.03075
TCGA-A8-A09A-01	4.61846
TCGA-A1-A0SG-01	4.08658
TCGA-BH-A1F6-01	3.18551
TCGA-E9-A249-01	3.22134
TCGA-BH-A1F2-01	4.82092
TCGA-A8-A096-01	2.76151
TCGA-AR-A1AI-01	2.58169
TCGA-AC-A3BB-01	3.31301
TCGA-BH-A0WA-01	3.54247
TCGA-AQ-A1H3-01	3.86681
TCGA-BH-A0E7-01	4.19621
TCGA-BH-A0RX-01	3.37089
TCGA-AO-A03U-01	3.17655
TCGA-AR-A24L-01	4.38141
TCGA-E2-A1IJ-01	3.75119
TCGA-E2-A150-01	3.78809
TCGA-E2-A15H-01	3.68968
TCGA-BH-A0E0-01	3.67152
TCGA-A2-A0D1-01	3.85141
TCGA-A8-A09D-01	4.29711
TCGA-AQ-A1H2-01	3.1378
TCGA-D8-A1JH-01	3.74321
TCGA-GM-A3NW-01	4.14625
TCGA-A7-A0CD-01	3.86462
TCGA-A7-A2KD-01	4.01653
TCGA-AO-A03L-01	3.54146
TCGA-AR-A2LR-01	3.41546
TCGA-E2-A14T-01	4.35926
TCGA-AR-A24U-01	3.54465
TCGA-BH-A28Q-01	3.58356
TCGA-C8-A3M7-01	3.74759
TCGA-BH-A0EE-01	3.19591
TCGA-3C-AALK-01	4.17522
TCGA-EW-A1OW-01	3.33911
TCGA-E2-A108-01	3.37535
TCGA-A2-A0D4-01	4.7778
TCGA-E9-A1RA-01	3.39137
TCGA-V7-A7HQ-01	4.46101
TCGA-AR-A24X-01	3.03974
TCGA-D8-A73X-01	3.64456
TCGA-BH-A0W4-01	4.14965
TCGA-BH-A1ET-01	3.48784
TCGA-BH-A0C7-01	3.65372
TCGA-LD-A7W5-01	3.08598
TCGA-D8-A1XK-01	2.35119
TCGA-A2-A0T4-01	4.05429
TCGA-AN-A0FX-01	3.69826
TCGA-A2-A0D3-01	3.0161
TCGA-D8-A1XS-01	3.92911
TCGA-C8-A138-01	4.50529
TCGA-AR-A24R-01	3.73838
TCGA-BH-A2L8-01	2.97657
TCGA-E2-A14V-01	4.04902
TCGA-AO-A0JE-01	3.5207
TCGA-A8-A06O-01	3.75586
TCGA-AO-A0J4-01	3.29358
TCGA-EW-A1P3-01	4.42461
TCGA-B6-A0WT-01	4.12316
TCGA-C8-A26W-01	3.92596
TCGA-AN-A041-01	4.49319
TCGA-D8-A1Y3-01	2.80309
TCGA-B6-A40B-01	4.20282
TCGA-B6-A1KI-01	4.28113
TCGA-A8-A090-01	3.28341
TCGA-BH-A0B6-01	3.29185
TCGA-A8-A09W-01	3.46262
TCGA-AO-A03M-01	3.94594
TCGA-E2-A1L6-01	3.56492
TCGA-AR-A0TQ-01	3.96882
TCGA-B6-A0RP-01	3.46149
TCGA-AN-A0FK-01	3.71961
TCGA-E9-A22D-01	2.84826
TCGA-BH-A18L-01	4.14508
TCGA-E9-A1RG-01	4.63565
TCGA-D8-A146-01	4.10594
TCGA-AO-A0JL-01	5.02466
TCGA-EW-A6SB-01	2.98146
TCGA-3C-AAAU-01	3.90203
TCGA-GM-A2DF-01	4.35977
TCGA-E2-A15J-01	2.90369
TCGA-EW-A424-01	3.94195
TCGA-A8-A07Z-01	3.94216
TCGA-BH-A0BF-01	3.39612
TCGA-E2-A154-01	3.95656
TCGA-A8-A08T-01	3.5856
TCGA-A8-A085-01	4.40808
TCGA-EW-A1P4-01	2.80133
TCGA-EW-A1J1-01	3.40242
TCGA-A8-A084-01	3.51799
TCGA-E9-A1R7-01	3.88124
TCGA-AO-A0JA-01	3.98677
TCGA-A2-A1G4-01	3.99826
TCGA-C8-A12K-01	2.69773
TCGA-A2-A0CK-01	3.64922
TCGA-A7-A4SE-01	3.26604
TCGA-C8-A274-01	4.03918
TCGA-BH-A0B0-01	3.72741
TCGA-BH-A1EY-01	3.73456
TCGA-C8-A12O-01	4.05607
TCGA-BH-A42U-01	3.68011
TCGA-AQ-A04H-01	4.21314
TCGA-A7-A425-01	3.53901
TCGA-AN-A049-01	3.39081
TCGA-A8-A06Y-01	3.86546
TCGA-AR-A2LE-01	3.74146
TCGA-AC-A23G-01	4.02784
TCGA-A7-A5ZV-01	4.92184
TCGA-BH-A0BL-01	3.54019
TCGA-EW-A1PA-01	4.73522
TCGA-E9-A1RC-01	4.27828
TCGA-A2-A1FV-01	4.40487
TCGA-BH-A0AU-01	4.18492
TCGA-LL-A73Y-01	3.92486
TCGA-D8-A1JC-01	4.35826
TCGA-E2-A1B4-01	3.94211
TCGA-A2-A0EW-01	3.82345
TCGA-E9-A1NG-01	3.55122
TCGA-AR-A1AL-01	3.33186
TCGA-LD-A7W6-01	3.45299
TCGA-JL-A3YW-01	3.73119
TCGA-A2-A1FX-01	3.62435
TCGA-BH-A1FJ-01	3.43311
TCGA-A2-A0EX-01	3.88941
TCGA-A2-A0CM-01	2.11066
TCGA-GM-A2DA-01	4.45247
TCGA-B6-A0X7-01	3.9822
TCGA-AR-A2LQ-01	4.02186
TCGA-W8-A86G-01	4.07056
TCGA-BH-A0HO-01	2.97949
TCGA-BH-A1FU-01	3.37115
TCGA-A8-A091-01	4.24653
TCGA-E9-A1N3-01	3.92286
TCGA-AR-A0U2-01	3.43649
TCGA-BH-A0W7-01	3.79646
TCGA-E9-A1R5-01	3.74843
TCGA-3C-AALI-01	4.24402
TCGA-E9-A1RI-01	4.17116
TCGA-A2-A0ER-01	4.64365
TCGA-3C-AALJ-01	4.07211
TCGA-E9-A6HE-01	3.52693
TCGA-A7-A5ZX-01	3.773
TCGA-BH-A201-01	4.35097
TCGA-A2-A04W-01	5.13043
TCGA-D8-A73W-01	3.35337
TCGA-A7-A3IY-01	3.17451
TCGA-OL-A6VR-01	3.85006
TCGA-EW-A2FR-01	4.31524
TCGA-BH-A0HP-01	4.04999
TCGA-AR-A0TP-01	4.93725
TCGA-C8-A12X-01	4.17904
TCGA-D8-A1XJ-01	3.49728
TCGA-AR-A0TZ-01	4.47488
TCGA-EW-A1OY-01	3.86985
TCGA-GM-A2DC-01	3.96075
TCGA-BH-A18N-01	3.73085
TCGA-E9-A1ND-01	3.14082
TCGA-D8-A1XR-01	3.40602
TCGA-A2-A0ES-01	4.02456
TCGA-C8-A1HO-01	3.87554
TCGA-LL-A9Q3-01	4.47388
TCGA-A7-A3J1-01	3.20765
TCGA-AC-A5EH-01	3.40076
TCGA-E2-A15O-01	3.86792
TCGA-AC-A3W6-01	3.51512
TCGA-AN-A0FD-01	4.33241
TCGA-BH-A0BM-01	4.31045
TCGA-E9-A22H-01	3.02939
TCGA-EW-A1IY-01	3.28518
TCGA-E9-A3X8-01	4.25953
TCGA-AR-A24K-01	3.20214
TCGA-S3-AA11-01	3.65623
TCGA-EW-A6SA-01	3.77938
TCGA-A2-A0CP-01	4.2021
TCGA-B6-A0RU-01	4.01493
TCGA-B6-A0RS-01	3.94041
TCGA-A1-A0SN-01	3.37702
TCGA-EW-A1IZ-01	3.38108
TCGA-A7-A13F-01	3.97685
TCGA-D8-A1JT-01	4.08654
TCGA-D8-A1JM-01	3.0156
TCGA-BH-A0BQ-01	3.65566
TCGA-BH-A0EA-01	3.79184
TCGA-BH-A0BA-01	3.89082
TCGA-EW-A6SC-01	3.77985
TCGA-OL-A5DA-01	3.56235
TCGA-A2-A0T1-01	3.75935
TCGA-AO-A0JC-01	2.06437
TCGA-EW-A2FS-01	4.75155
TCGA-A8-A09K-01	3.49426
TCGA-E2-A107-01	3.91863
TCGA-A7-A6VY-01	3.17544
TCGA-E2-A14Q-01	4.34208
TCGA-E2-A15A-06	3.3839
TCGA-B6-A0IB-01	4.81143
TCGA-A8-A06Q-01	3.96157
TCGA-GM-A2DK-01	5.15704
TCGA-5L-AAT0-01	3.43988
TCGA-A7-A4SC-01	3.47819
TCGA-A2-A0CR-01	3.41007
TCGA-AC-A2QJ-01	3.96608
TCGA-AN-A03X-01	4.60543
TCGA-AN-A0FL-01	5.06996
TCGA-BH-A18P-01	3.42915
TCGA-AC-A3YI-01	3.8684
TCGA-A2-A0SY-01	3.71083
TCGA-GM-A2DM-01	3.4819
TCGA-D8-A1XF-01	3.795
TCGA-BH-A1FM-01	4.66197
TCGA-BH-A0HN-01	3.95385
TCGA-AN-A0FV-01	4.21293
TCGA-B6-A0X0-01	3.04907
TCGA-AO-A03T-01	5.42915
TCGA-S3-AA15-01	3.7459
TCGA-AO-A12D-01	3.50087
TCGA-BH-A0DK-01	4.02528
TCGA-AO-A124-01	3.34041
TCGA-E2-A15R-01	4.34829
TCGA-D8-A1Y1-01	4.03107
TCGA-A2-A04T-01	3.78914
TCGA-UU-A93S-01	3.58046
TCGA-A2-A0T6-01	3.57976
TCGA-E2-A10F-01	3.4468
TCGA-EW-A1IW-01	4.12475
TCGA-E9-A1NC-01	3.98484
TCGA-AC-A3TM-01	3.72532
TCGA-E9-A1QZ-01	4.06085
TCGA-A8-A09C-01	4.51708
TCGA-D8-A73U-01	3.35066
TCGA-A8-A07E-01	3.62186
TCGA-AC-A3TN-01	3.93213
TCGA-AO-A0JF-01	3.70484
TCGA-E2-A153-01	4.01576
TCGA-BH-A0B5-01	3.43879
TCGA-A8-A07W-01	3.68475
TCGA-BH-A0B8-01	4.24044
TCGA-BH-A0B1-01	4.18493
TCGA-BH-A1FN-01	3.3426
TCGA-D8-A147-01	3.05479
TCGA-PL-A8LX-01	3.46989
TCGA-E9-A1N4-01	3.10481
TCGA-BH-A18F-01	3.84465
TCGA-D8-A27F-01	3.81413
TCGA-A8-A0AB-01	3.89178
TCGA-AR-A0TS-01	3.2193
TCGA-BH-A0H9-01	3.82649
TCGA-A8-A07U-01	3.48301
TCGA-E2-A14X-01	3.49537
TCGA-C8-A131-01	4.01691
TCGA-BH-A1FL-01	3.41759
TCGA-C8-A12W-01	3.86621
TCGA-AC-A7VC-01	3.31556
TCGA-AO-A12E-01	4.23338
TCGA-E2-A1LI-01	2.98379
TCGA-AC-A2BM-01	3.40741
TCGA-A8-A07R-01	3.482
TCGA-BH-A0AW-01	3.64879
TCGA-A7-A426-01	3.80302
TCGA-BH-A6R8-01	3.9272
TCGA-AC-A8OS-01	4.17681
TCGA-A2-A04Q-01	3.24399
TCGA-A7-A26H-01	3.79208
TCGA-A7-A4SF-01	4.9056
TCGA-D8-A27M-01	3.50329
TCGA-E9-A1NE-01	3.1219
TCGA-E2-A573-01	2.75326
TCGA-C8-A1HI-01	3.96471
TCGA-A7-A6VW-01	2.62773
TCGA-BH-A0B7-01	3.58452
TCGA-A8-A0A6-01	2.85793
TCGA-AO-A0J5-01	4.38876
TCGA-AO-A12H-01	3.92572
TCGA-E2-A15G-01	3.38026
TCGA-GM-A5PV-01	3.76436
TCGA-E9-A24A-01	2.89859
TCGA-AR-A2LM-01	3.54872
TCGA-E2-A1II-01	2.16354
TCGA-D8-A27P-01	3.6542
TCGA-EW-A1J3-01	4.30955
TCGA-B6-A0I8-01	5.14392
TCGA-AO-A1KS-01	4.02396
TCGA-A2-A4S2-01	3.26242
TCGA-BH-A6R9-01	3.51815
TCGA-BH-A8FZ-01	3.35093
TCGA-AC-A2FK-01	3.44799
TCGA-A2-A0T0-01	2.96863
TCGA-A8-A07S-01	3.02279
TCGA-GM-A2DI-01	3.07537
TCGA-E2-A106-01	4.50732
TCGA-BH-A0E6-01	4.08931
TCGA-AO-A03V-01	4.23952
TCGA-AC-A2BK-01	3.65673
TCGA-AR-A254-01	2.99066
TCGA-AO-A129-01	3.26856
TCGA-BH-A8FY-01	3.8615
TCGA-D8-A143-01	3.12426
TCGA-AC-A3W7-01	3.55696
TCGA-A8-A06X-01	3.28925
TCGA-AR-A255-01	3.48522
TCGA-BH-A0DZ-01	3.78138
TCGA-C8-A12T-01	4.2487
TCGA-AO-A12G-01	4.90301
TCGA-E2-A15L-01	3.55658
TCGA-AN-A0FF-01	3.47551
TCGA-A2-A3XX-01	3.88267
TCGA-EW-A1P8-01	2.59306
TCGA-A8-A097-01	4.1723
TCGA-BH-A0E1-01	3.69843
TCGA-BH-A0HF-01	4.01665
TCGA-E9-A5FL-01	4.81462
TCGA-AR-A1AW-01	2.98219
TCGA-AQ-A0Y5-01	3.99634
TCGA-OK-A5Q2-01	3.34226
TCGA-E2-A1B6-01	2.38469
TCGA-A8-A07P-01	3.87906
TCGA-AR-A0TW-01	3.50776
TCGA-E9-A1N6-01	3.38014
TCGA-BH-A1EU-01	3.36642
TCGA-A2-A0EQ-01	3.3334
TCGA-A8-A08C-01	2.84968
TCGA-OL-A5RW-01	3.3143
TCGA-B6-A0WS-01	3.81034
TCGA-BH-A42V-01	3.43302
TCGA-A2-A0YL-01	3.54233
TCGA-B6-A402-01	3.65944
TCGA-A7-A0CJ-01	3.4241
TCGA-E9-A22E-01	4.22318
TCGA-A2-A3Y0-01	2.35953
TCGA-AN-A0FZ-01	4.3312
TCGA-BH-A0DQ-01	4.48995
TCGA-A8-A07J-01	3.36499
TCGA-E9-A54X-01	4.27529
TCGA-B6-A1KC-01	4.0695
TCGA-BH-A18K-01	4.40193
TCGA-A2-A0EU-01	4.34441
TCGA-B6-A0IH-01	3.98308
TCGA-A2-A0EY-01	3.86807
TCGA-AO-A0JJ-01	3.49122
TCGA-C8-A26X-01	3.65321
TCGA-BH-A18Q-01	3.14182
TCGA-A8-A092-01	3.65956
TCGA-S3-AA12-01	4.29356
TCGA-BH-A1EO-01	4.10899
TCGA-A2-A4RW-01	3.85618
TCGA-D8-A142-01	4.356
TCGA-A2-A0YE-01	4.64867
TCGA-A2-A04P-01	4.55777
TCGA-A2-A0CY-01	3.89837
TCGA-E9-A1RB-01	3.33809
TCGA-A7-A5ZW-01	3.61469
TCGA-E2-A1IN-01	4.3754
TCGA-EW-A6S9-01	4.29602
TCGA-AR-A5QM-01	4.11846
TCGA-AO-A0J7-01	3.61896
TCGA-A2-A3KC-01	3.77608
TCGA-E2-A15D-01	3.56996
TCGA-A2-A0YG-01	3.52568
TCGA-AO-A03O-01	2.8179
TCGA-OL-A66N-01	4.02323
TCGA-B6-A0I2-01	2.95404
TCGA-E2-A572-01	4.40575
TCGA-EW-A1PG-01	3.81937
TCGA-A7-A26G-01	3.85913
TCGA-B6-A0WV-01	4.48499
TCGA-AO-A0JM-01	4.06553
TCGA-D8-A1X7-01	3.58206
TCGA-C8-A3M8-01	4.30492
TCGA-LL-A5YN-01	3.06072
TCGA-B6-A0RG-01	4.20038
TCGA-AC-A3OD-01	5.04979
TCGA-A8-A08O-01	4.14504
TCGA-A8-A07B-01	4.13958
TCGA-A8-A08L-01	3.40391
TCGA-E2-A15I-01	3.44088
TCGA-BH-A0HQ-01	4.05621
TCGA-AR-A24V-01	4.12093
TCGA-EW-A1P1-01	3.81216
TCGA-EW-A3E8-01	3.67916
TCGA-A8-A07O-01	2.05245
TCGA-AN-A04D-01	3.87657
TCGA-E9-A2JT-01	2.3909
TCGA-A2-A4S3-01	4.2081
TCGA-AN-A0AK-01	3.3237
TCGA-AO-A1KO-01	4.39375
TCGA-BH-A1ES-06	5.1393
TCGA-AR-A1AV-01	3.7193
TCGA-A2-A0D0-01	3.04328
TCGA-A7-A13G-01	4.98218
TCGA-AC-A2QI-01	3.46301
TCGA-AC-A2FM-01	4.53547
TCGA-B6-A0X5-01	4.20521
TCGA-C8-A12L-01	3.3678
TCGA-AN-A0AS-01	3.78423
TCGA-A8-A0A2-01	3.7234
TCGA-LQ-A4E4-01	3.9265
TCGA-A1-A0SI-01	3.62944
TCGA-BH-A5J0-01	3.48014
TCGA-D8-A1Y2-01	3.3422
TCGA-A7-A3RF-01	3.79386
TCGA-A2-A0T5-01	3.32346
TCGA-BH-A1F5-01	4.65927
TCGA-LD-A66U-01	3.29422
TCGA-E9-A3QA-01	2.79915
TCGA-AO-A12F-01	3.91957
TCGA-A2-A25E-01	4.16185
TCGA-A8-A0A4-01	4.01014
TCGA-EW-A1J6-01	5.29737
TCGA-C8-A8HR-01	3.70517
TCGA-BH-A0BV-01	3.49033
TCGA-D8-A27T-01	3.35403
TCGA-E9-A1RE-01	4.25084
TCGA-A2-A0T3-01	4.00683
TCGA-E2-A15E-01	4.27817
TCGA-E9-A1N5-01	4.15859
TCGA-B6-A0RV-01	3.51074
TCGA-E2-A15P-01	4.13684
TCGA-AC-A3EH-01	3.63519
TCGA-BH-A1FB-01	3.34179
TCGA-A8-A07C-01	3.00939
TCGA-E9-A5FK-01	3.53353
TCGA-A2-A0CO-01	3.65561
TCGA-A8-A0A9-01	3.39885
TCGA-C8-A1HF-01	3.11037
TCGA-AQ-A54O-01	4.48679
TCGA-S3-AA17-01	3.4561
TCGA-MS-A51U-01	3.88494
TCGA-AC-A62V-01	4.07655
TCGA-GI-A2C8-01	4.00066
TCGA-BH-A18S-01	4.04024
TCGA-EW-A1P7-01	2.73389
TCGA-A8-A08P-01	3.11068
TCGA-A8-A095-01	3.32121
TCGA-EW-A1P0-01	3.15582
TCGA-A2-A4S1-01	4.50104
TCGA-AR-A0U3-01	3.87516
TCGA-BH-A0EB-01	3.0966
TCGA-E9-A54Y-01	4.60094
TCGA-D8-A1XU-01	4.1283
TCGA-OL-A66J-01	4.30713
TCGA-EW-A1PD-01	4.40703
TCGA-BH-A0BC-01	3.65088
TCGA-AC-A23H-01	4.18674
TCGA-D8-A1XC-01	3.68033
TCGA-AN-A0XV-01	4.13172
TCGA-A8-A08G-01	3.40197
TCGA-A2-A1FW-01	3.89666
TCGA-LL-A5YO-01	2.63826
TCGA-E9-A1RF-01	4.21206
TCGA-XX-A899-01	3.38896
TCGA-E2-A15K-06	3.7487
TCGA-AO-A0JI-01	4.20868
TCGA-AN-A0AM-01	3.44693
TCGA-AO-A128-01	1.69474
TCGA-C8-A12N-01	3.60543
TCGA-A7-A6VX-01	3.53799
TCGA-C8-A133-01	3.62043
TCGA-A2-A0CS-01	3.95532
TCGA-E2-A15K-01	3.44273
TCGA-A8-A083-01	3.46273
TCGA-XX-A89A-01	4.11504
TCGA-BH-A28O-01	3.86609
TCGA-B6-A0IC-01	3.40624
TCGA-B6-A401-01	3.94446
TCGA-AN-A0XS-01	3.98125
TCGA-A7-A0CG-01	3.38022
TCGA-A1-A0SM-01	3.86243
TCGA-D8-A27R-01	3.94536
TCGA-GM-A2DD-01	3.7979
TCGA-LL-A740-01	3.88935
TCGA-AR-A24T-01	3.93983
TCGA-BH-A0H0-01	4.43365
TCGA-A8-A09T-01	3.38931
TCGA-B6-A0WW-01	3.86107
TCGA-OL-A66L-01	3.8509
TCGA-A8-A0A7-01	3.95232
TCGA-A7-A4SA-01	3.86918
TCGA-A2-A0EN-01	3.79988
TCGA-B6-A0IO-01	4.22092
TCGA-AC-A8OQ-01	4.086
TCGA-D8-A27E-01	3.58926
TCGA-BH-A8G0-01	3.44694
TCGA-A2-A3XW-01	3.96361
TCGA-BH-A0DP-01	3.78897
TCGA-PE-A5DD-01	4.2799
TCGA-OL-A66K-01	3.96068
TCGA-BH-A1FG-01	4.681
TCGA-A2-A25D-01	3.3518
TCGA-S3-AA14-01	4.29492
TCGA-LL-A440-01	3.98054
TCGA-A2-A0SW-01	4.45398
TCGA-D8-A1XW-01	3.60797
TCGA-B6-A2IU-01	4.00474
TCGA-GM-A2DO-01	3.14842
TCGA-B6-A0IA-01	3.86116
TCGA-C8-A26Y-01	4.16894
TCGA-AN-A0G0-01	3.84367
TCGA-AO-A0JG-01	3.2691
TCGA-E2-A1LH-01	3.99794
TCGA-AN-A0FY-01	4.10399
TCGA-E2-A1L9-01	3.63494
TCGA-BH-A0W5-01	3.36358
TCGA-AQ-A54N-01	3.46504
TCGA-GM-A3NY-01	3.99807
TCGA-A8-A09E-01	3.53093
TCGA-AR-A0TX-01	3.9441
TCGA-AQ-A04J-01	3.51975
TCGA-AR-A2LJ-01	3.86803
TCGA-OL-A66H-01	3.13843
TCGA-AC-A23C-01	3.59207
TCGA-D8-A1XQ-01	3.14034
TCGA-E2-A156-01	3.45118
TCGA-AC-A6IV-01	3.90403
TCGA-E2-A15E-06	3.80405
TCGA-D8-A1X6-01	3.08353
TCGA-A8-A0AD-01	4.0678
TCGA-A8-A07G-01	4.10299
TCGA-C8-A130-01	4.26036
TCGA-AN-A046-01	3.59382
TCGA-E2-A1AZ-01	2.96606
TCGA-B6-A400-01	3.57798
TCGA-Z7-A8R5-01	3.59339
TCGA-E2-A155-01	4.90655
TCGA-E2-A109-01	4.16833
TCGA-BH-A1EN-01	5.0356
TCGA-AR-A1AQ-01	3.03104
TCGA-E2-A574-01	3.25935
TCGA-A2-A1G0-01	4.07412
TCGA-AC-A4ZE-01	4.26581
TCGA-AR-A24O-01	3.69412
TCGA-BH-A0AV-01	3.45685
TCGA-C8-A137-01	4.28062
TCGA-B6-A0RL-01	4.70927
TCGA-OL-A5RV-01	3.7102
TCGA-B6-A0IM-01	4.19264
TCGA-B6-A0IK-01	3.50416
TCGA-B6-A0WX-01	3.38907
TCGA-AR-A24H-01	2.75014
TCGA-B6-A0IQ-01	3.01868
TCGA-D8-A27N-01	4.05626
TCGA-C8-A275-01	3.10423
TCGA-B6-A0IG-01	4.55705
TCGA-E9-A243-01	2.74632
TCGA-D8-A1JE-01	4.07891
TCGA-E2-A1LE-01	3.6799
TCGA-AC-A6IX-01	3.8099
TCGA-A8-A09Q-01	3.03855
TCGA-AN-A0AL-01	3.97234
TCGA-A2-A4RY-01	3.6024
TCGA-AR-A5QQ-01	2.83215
TCGA-D8-A140-01	3.88551
TCGA-A2-A0YH-01	3.7608
TCGA-B6-A3ZX-01	2.40488
TCGA-A1-A0SE-01	3.96915
TCGA-AR-A1AN-01	3.74989
TCGA-A8-A08R-01	3.58813
TCGA-OL-A5RX-01	3.41333
TCGA-AR-A2LO-01	3.4828
TCGA-BH-A0BD-01	3.8361
TCGA-AR-A24N-01	3.72024
TCGA-AR-A2LH-01	2.93388
TCGA-AR-A1AO-01	3.13551
TCGA-BH-A1EW-01	3.49094
TCGA-BH-A0W3-01	3.57369
TCGA-EW-A1PF-01	3.90357
TCGA-S3-A6ZG-01	3.65305
TCGA-E9-A22A-01	3.84764
TCGA-A2-A0YT-01	3.99009
TCGA-B6-A0IN-01	5.04155
TCGA-C8-A1HJ-01	3.98029
TCGA-AQ-A7U7-01	2.83189
TCGA-D8-A1JI-01	3.72944
TCGA-GM-A2D9-01	3.6084
TCGA-A8-A06R-01	4.1705
TCGA-AR-A1AT-01	2.3312
TCGA-AO-A1KP-01	4.59107
TCGA-AN-A0AJ-01	2.84062
TCGA-A8-A07F-01	3.44437
TCGA-GM-A3XG-01	4.00679
TCGA-AR-A0TV-01	3.65019
TCGA-A2-A3XY-01	3.21772
TCGA-BH-A0DD-01	3.78923
TCGA-A2-A1FZ-01	3.58242
TCGA-D8-A13Z-01	3.07426
TCGA-A2-A25C-01	3.82429
TCGA-AN-A0XR-01	3.36968
TCGA-B6-A0RN-01	3.74273
TCGA-AC-A2FB-01	3.18099
TCGA-AC-A7VB-01	4.22624
TCGA-A2-A0YM-01	2.08742
TCGA-OL-A5D8-01	3.47566
TCGA-D8-A1XL-01	3.08814
TCGA-AR-A252-01	3.2249
TCGA-BH-A18G-01	3.55922
TCGA-OL-A5D6-01	4.02848
TCGA-A8-A086-01	4.29778

## Sheet: Docetaxel
TCGA-D8-A1XO-01	-5.4161
TCGA-AN-A0FN-01	-5.50552
TCGA-AC-A62X-01	-6.58388
TCGA-E2-A14U-01	-5.33305
TCGA-E9-A1R3-01	-5.43207
TCGA-BH-A18M-01	-5.66684
TCGA-E2-A15T-01	-4.73505
TCGA-AR-A0TU-01	-6.14919
TCGA-EW-A1IX-01	-5.36464
TCGA-B6-A408-01	-5.40035
TCGA-E2-A1IE-01	-5.11492
TCGA-E2-A10E-01	-5.4107
TCGA-EW-A3U0-01	-5.13012
TCGA-BH-A0H5-01	-4.76178
TCGA-E2-A14W-01	-5.35005
TCGA-AQ-A04L-01	-6.05309
TCGA-BH-A1FD-01	-5.5296
TCGA-AR-A0TR-01	-4.40909
TCGA-A7-A0CE-01	-5.65082
TCGA-AO-A0J8-01	-5.11378
TCGA-BH-A1F0-01	-4.82921
TCGA-A2-A0SU-01	-5.54892
TCGA-AC-A2FF-01	-4.87183
TCGA-LL-A6FP-01	-5.24039
TCGA-E2-A15S-01	-4.86911
TCGA-E2-A14N-01	-6.01426
TCGA-D8-A1JK-01	-5.65809
TCGA-D8-A3Z6-01	-5.52744
TCGA-A8-A06U-01	-4.73521
TCGA-A7-A13E-01	-4.60375
TCGA-UL-AAZ6-01	-5.42373
TCGA-B6-A0I9-01	-4.91931
TCGA-A8-A099-01	-5.09649
TCGA-OL-A5RY-01	-5.82827
TCGA-E9-A1NA-01	-5.42324
TCGA-D8-A1XV-01	-3.95504
TCGA-BH-A18T-01	-6.01824
TCGA-B6-A0RT-01	-4.77962
TCGA-A1-A0SJ-01	-4.69697
TCGA-E9-A247-01	-5.73036
TCGA-C8-A12P-01	-5.2513
TCGA-A8-A09X-01	-5.41358
TCGA-BH-A1FC-01	-5.35771
TCGA-A8-A082-01	-5.03254
TCGA-C8-A12M-01	-4.15231
TCGA-BH-A1EV-01	-5.28896
TCGA-C8-A135-01	-5.26446
TCGA-WT-AB44-01	-5.32789
TCGA-A7-A3J0-01	-4.34519
TCGA-E9-A1R0-01	-5.32014
TCGA-B6-A0IJ-01	-5.40426
TCGA-LL-A441-01	-5.06995
TCGA-A2-A3XT-01	-5.6756
TCGA-D8-A27I-01	-5.27215
TCGA-A8-A094-01	-4.54383
TCGA-A2-A1G6-01	-5.24433
TCGA-BH-A0GY-01	-5.57051
TCGA-E2-A1B0-01	-5.24587
TCGA-E9-A1RH-01	-5.96143
TCGA-C8-A1HG-01	-4.82953
TCGA-A1-A0SB-01	-5.87103
TCGA-A7-A0DC-01	-3.32512
TCGA-A7-A3IZ-01	-4.76776
TCGA-LL-A5YL-01	-5.62732
TCGA-BH-A0DI-01	-5.49883
TCGA-E2-A1B1-01	-4.68647
TCGA-BH-A0H3-01	-5.2197
TCGA-D8-A27K-01	-5.00866
TCGA-A2-A04U-01	-6.77252
TCGA-AO-A0J6-01	-5.92476
TCGA-BH-A0E2-01	-5.73577
TCGA-E2-A1L8-01	-4.88426
TCGA-OL-A5RZ-01	-6.12537
TCGA-B6-A1KF-01	-5.27884
TCGA-E2-A1L7-01	-5.15882
TCGA-B6-A0I6-01	-5.8685
TCGA-AN-A0XL-01	-4.94949
TCGA-A8-A08B-01	-5.40595
TCGA-AC-A6IX-06	-4.35939
TCGA-E2-A2P6-01	-4.65897
TCGA-E2-A3DX-01	-4.89694
TCGA-E2-A159-01	-5.95808
TCGA-E9-A1NH-01	-5.61707
TCGA-A8-A0A1-01	-4.70647
TCGA-D8-A4Z1-01	-5.25024
TCGA-AR-A1AS-01	-5.87192
TCGA-AR-A24P-01	-4.95464
TCGA-A8-A09Z-01	-4.50542
TCGA-BH-A0HL-01	-4.8276
TCGA-A8-A08X-01	-5.2518
TCGA-A8-A09V-01	-4.75524
TCGA-D8-A1XT-01	-5.80396
TCGA-GM-A4E0-01	-4.83351
TCGA-AN-A0XN-01	-5.84214
TCGA-A2-A04V-01	-5.68534
TCGA-A7-A26I-01	-3.98713
TCGA-A2-A3XS-01	-5.55085
TCGA-BH-A0BP-01	-5.17406
TCGA-AC-A3QQ-01	-2.651
TCGA-AO-A12C-01	-5.51648
TCGA-E2-A1IH-01	-5.27139
TCGA-BH-A0DS-01	-5.11596
TCGA-AN-A0FS-01	-5.43764
TCGA-E2-A15F-01	-4.96789
TCGA-BH-A0H7-01	-5.20684
TCGA-A8-A079-01	-5.03039
TCGA-D8-A1XY-01	-5.20443
TCGA-AO-A0JD-01	-5.63103
TCGA-B6-A0WZ-01	-5.46868
TCGA-D8-A1XB-01	-5.47788
TCGA-BH-A0BS-01	-5.05707
TCGA-BH-A1EX-01	-4.64138
TCGA-D8-A1X8-01	-4.89826
TCGA-HN-A2OB-01	-5.65984
TCGA-B6-A0I1-01	-5.28903
TCGA-OL-A97C-01	-5.64103
TCGA-E2-A1LK-01	-5.24638
TCGA-D8-A1J8-01	-4.27499
TCGA-A8-A06P-01	-5.37389
TCGA-D8-A3Z5-01	-5.2783
TCGA-E2-A152-01	-4.93984
TCGA-BH-A0DT-01	-5.32338
TCGA-A1-A0SQ-01	-4.22777
TCGA-BH-A1FE-01	-5.16728
TCGA-BH-A0BR-01	-5.77019
TCGA-BH-A18V-01	-5.46565
TCGA-GM-A3XN-01	-5.7802
TCGA-A8-A09B-01	-5.22482
TCGA-PL-A8LY-01	-6.07784
TCGA-E2-A10A-01	-5.63685
TCGA-A7-A6VV-01	-6.03552
TCGA-BH-A0BW-01	-4.22407
TCGA-AN-A04A-01	-5.76168
TCGA-OL-A66P-01	-5.46323
TCGA-A2-A0SV-01	-5.96613
TCGA-E2-A1LG-01	-4.8567
TCGA-E2-A1LL-01	-7.19543
TCGA-A2-A0ET-01	-4.16572
TCGA-B6-A0RI-01	-5.65027
TCGA-BH-A0GZ-01	-5.51603
TCGA-A2-A25A-01	-5.27802
TCGA-A8-A06N-01	-3.61306
TCGA-EW-A1J5-01	-4.32025
TCGA-D8-A27V-01	-5.22412
TCGA-A2-A0ST-01	-4.90058
TCGA-A2-A0CT-01	-4.98033
TCGA-AR-A0TT-01	-4.97017
TCGA-LL-A8F5-01	-5.79902
TCGA-AN-A0FW-01	-5.07456
TCGA-BH-A18U-01	-5.39827
TCGA-E9-A248-01	-4.09492
TCGA-A2-A0CU-01	-4.42849
TCGA-BH-A0HY-01	-5.19222
TCGA-D8-A1XG-01	-4.85042
TCGA-BH-A204-01	-4.50992
TCGA-AR-A0U4-01	-4.97881
TCGA-E2-A14S-01	-4.43737
TCGA-D8-A1JS-01	-5.55901
TCGA-C8-A1HK-01	-4.61534
TCGA-AR-A250-01	-5.12501
TCGA-EW-A1PB-01	-6.02119
TCGA-AC-A2B8-01	-5.15824
TCGA-A8-A08I-01	-3.79943
TCGA-BH-A18V-06	-5.11785
TCGA-LL-A6FQ-01	-6.00491
TCGA-A1-A0SP-01	-5.74227
TCGA-LL-A442-01	-4.66894
TCGA-A2-A3XU-01	-6.47078
TCGA-A2-A25B-01	-4.79908
TCGA-AO-A1KT-01	-5.54658
TCGA-B6-A1KN-01	-4.86865
TCGA-LL-A5YP-01	-6.22967
TCGA-AR-A1AU-01	-5.30191
TCGA-A7-A26J-01	-4.30914
TCGA-E9-A245-01	-4.73116
TCGA-BH-A42T-01	-6.02287
TCGA-A2-A0EM-01	-5.64281
TCGA-PE-A5DC-01	-5.51386
TCGA-A7-A13D-01	-4.68706
TCGA-BH-A0HK-01	-5.03795
TCGA-B6-A0IP-01	-5.40488
TCGA-D8-A1XA-01	-5.18355
TCGA-D8-A1X5-01	-4.73952
TCGA-D8-A27L-01	-5.05102
TCGA-D8-A1JJ-01	-5.49019
TCGA-A2-A1G1-01	-5.25648
TCGA-E2-A1IL-01	-5.3307
TCGA-A7-A4SB-01	-5.05818
TCGA-A7-A13H-01	-5.26775
TCGA-BH-A0AY-01	-5.67926
TCGA-A8-A075-01	-5.42549
TCGA-E2-A158-01	-4.8413
TCGA-BH-A0B4-01	-5.59928
TCGA-BH-A0DV-01	-5.48923
TCGA-A2-A0EP-01	-5.06009
TCGA-EW-A1PE-01	-4.80321
TCGA-LL-A73Z-01	-5.86216
TCGA-AR-A1AJ-01	-5.548
TCGA-E9-A227-01	-5.21456
TCGA-AO-A0JB-01	-4.87788
TCGA-A8-A09N-01	-5.31742
TCGA-E2-A15A-01	-5.03846
TCGA-A8-A08A-01	-5.49495
TCGA-AC-A5XS-01	-5.39987
TCGA-BH-A209-01	-4.83036
TCGA-AR-A24S-01	-4.91603
TCGA-A7-A26E-01	-4.24605
TCGA-EW-A1P6-01	-5.33335
TCGA-C8-A1HM-01	-4.63946
TCGA-OL-A6VQ-01	-5.4791
TCGA-E2-A1B5-01	-4.64789
TCGA-A2-A0CV-01	-5.73782
TCGA-5L-AAT1-01	-5.6366
TCGA-B6-A0X4-01	-4.66341
TCGA-E2-A105-01	-5.31434
TCGA-AC-A3HN-01	-5.52283
TCGA-A1-A0SO-01	-5.41628
TCGA-E2-A10B-01	-5.18761
TCGA-A1-A0SH-01	-5.61965
TCGA-E9-A2JS-01	-4.88115
TCGA-A2-A04R-01	-5.43116
TCGA-C8-A12Q-01	-4.71996
TCGA-AN-A0FT-01	-5.16102
TCGA-4H-AAAK-01	-5.98331
TCGA-E2-A15M-01	-4.63932
TCGA-A8-A08H-01	-5.49096
TCGA-C8-A273-01	-5.63857
TCGA-BH-A0DE-01	-4.98983
TCGA-C8-A12U-01	-4.56585
TCGA-A2-A0EO-01	-5.27567
TCGA-AC-A6IW-01	-5.67992
TCGA-LL-A50Y-01	-5.90165
TCGA-A7-A0DA-01	-5.22925
TCGA-GM-A2DL-01	-6.02661
TCGA-E9-A244-01	-5.77683
TCGA-E2-A15C-01	-4.9396
TCGA-BH-A0BT-01	-5.59433
TCGA-BH-A0E9-01	-4.73374
TCGA-BH-A18I-01	-5.44079
TCGA-BH-A0HI-01	-5.5173
TCGA-A2-A0CZ-01	-5.70965
TCGA-D8-A1X9-01	-5.18698
TCGA-BH-A18R-01	-5.24355
TCGA-AO-A12B-01	-4.99655
TCGA-BH-A0B3-01	-5.83132
TCGA-C8-A8HP-01	-5.04368
TCGA-AR-A1AM-01	-5.47297
TCGA-A2-A4S0-01	-4.51059
TCGA-AO-A126-01	-5.70285
TCGA-AR-A5QN-01	-5.42677
TCGA-A8-A08F-01	-4.94892
TCGA-PE-A5DE-01	-5.28206
TCGA-A8-A076-01	-4.91443
TCGA-A2-A3XZ-01	-5.12994
TCGA-AR-A256-01	-5.11701
TCGA-BH-A0DG-01	-5.10527
TCGA-C8-A26Z-01	-4.83765
TCGA-BH-A0HW-01	-4.43703
TCGA-A1-A0SD-01	-5.11549
TCGA-A2-A0CX-01	-5.40408
TCGA-AO-A03R-01	-4.87302
TCGA-PL-A8LZ-01	-5.85952
TCGA-BH-A1F8-01	-4.84728
TCGA-BH-A0BZ-01	-5.55089
TCGA-AC-A8OP-01	-4.70796
TCGA-GI-A2C9-01	-5.22065
TCGA-AO-A125-01	-4.61872
TCGA-EW-A1OZ-01	-5.72719
TCGA-BH-A0C0-01	-5.35198
TCGA-AN-A03Y-01	-5.0614
TCGA-D8-A145-01	-4.68282
TCGA-OL-A66I-01	-5.70594
TCGA-OL-A5S0-01	-6.3095
TCGA-B6-A0I5-01	-5.55515
TCGA-Z7-A8R6-01	-5.88913
TCGA-LD-A9QF-01	-5.30893
TCGA-C8-A134-01	-5.26894
TCGA-AN-A0XT-01	-4.76708
TCGA-BH-A0HA-01	-5.68311
TCGA-AR-A251-01	-4.90022
TCGA-C8-A26V-01	-5.19905
TCGA-OL-A5D7-01	-6.29437
TCGA-E2-A1IU-01	-4.9448
TCGA-AN-A0XO-01	-5.69387
TCGA-AN-A0AR-01	-5.79071
TCGA-E2-A1IO-01	-5.12443
TCGA-D8-A27H-01	-5.39379
TCGA-A7-A56D-01	-6.46375
TCGA-GM-A3XL-01	-6.15089
TCGA-BH-A0DX-01	-5.38354
TCGA-A2-A4RX-01	-5.9719
TCGA-B6-A0X1-01	-5.19377
TCGA-S3-AA0Z-01	-6.36989
TCGA-BH-A1FH-01	-5.03623
TCGA-AR-A24W-01	-4.82393
TCGA-A8-A06T-01	-5.20986
TCGA-B6-A0RM-01	-4.67616
TCGA-A2-A04N-01	-5.52927
TCGA-E9-A226-01	-5.1936
TCGA-BH-A0BJ-01	-5.52814
TCGA-E2-A10C-01	-4.60478
TCGA-BH-A5IZ-01	-6.29717
TCGA-E9-A1RD-01	-4.87262
TCGA-AC-A5XU-01	-5.40447
TCGA-E2-A576-01	-5.63178
TCGA-E9-A295-01	-5.22588
TCGA-LD-A74U-01	-5.43055
TCGA-E2-A570-01	-5.9052
TCGA-E9-A1NF-01	-5.93385
TCGA-E9-A1R4-01	-4.7474
TCGA-B6-A409-01	-5.9581
TCGA-EW-A423-01	-5.04951
TCGA-OL-A6VO-01	-6.22477
TCGA-EW-A6SD-01	-5.53405
TCGA-GM-A2DH-01	-5.15175
TCGA-LL-A5YM-01	-5.85167
TCGA-BH-A0H6-01	-5.33959
TCGA-E9-A1N8-01	-6.17048
TCGA-AR-A24Z-01	-4.74028
TCGA-A7-A4SD-01	-6.18499
TCGA-AR-A0U0-01	-5.62786
TCGA-BH-A203-01	-5.22125
TCGA-E2-A1IK-01	-4.80048
TCGA-D8-A13Y-01	-4.72718
TCGA-AR-A1AX-01	-4.68783
TCGA-E9-A1N9-01	-5.30537
TCGA-C8-A1HN-01	-5.27021
TCGA-A2-A0YC-01	-5.13627
TCGA-A2-A0CL-01	-5.02722
TCGA-D8-A1JA-01	-4.59271
TCGA-D8-A1XM-01	-5.14199
TCGA-A2-A04X-01	-4.90779
TCGA-AO-A12A-01	-5.28074
TCGA-E2-A1BC-01	-5.20351
TCGA-A2-A25F-01	-4.72127
TCGA-EW-A2FV-01	-5.14099
TCGA-C8-A132-01	-5.51601
TCGA-AN-A0AT-01	-5.87109
TCGA-AC-A3QP-01	-6.01399
TCGA-E9-A1R6-01	-5.52161
TCGA-C8-A27B-01	-4.75256
TCGA-E2-A14P-01	-5.6163
TCGA-LL-A7SZ-01	-5.24216
TCGA-BH-A0BO-01	-5.31556
TCGA-BH-A0HX-01	-5.12578
TCGA-A1-A0SF-01	-5.32319
TCGA-BH-A0B9-01	-6.17349
TCGA-D8-A1JG-01	-4.62181
TCGA-D8-A1JN-01	-4.461
TCGA-A8-A06Z-01	-4.46482
TCGA-A2-A0YD-01	-5.2535
TCGA-D8-A1JB-01	-4.40362
TCGA-JL-A3YX-01	-6.0224
TCGA-A1-A0SK-01	-5.23167
TCGA-AO-A03P-01	-5.49726
TCGA-E2-A1LA-01	-5.11112
TCGA-AN-A0FJ-01	-6.26825
TCGA-LL-A7T0-01	-5.75074
TCGA-D8-A141-01	-5.55688
TCGA-BH-A0HB-01	-5.72139
TCGA-C8-A12Z-01	-5.4317
TCGA-A8-A08S-01	-4.80523
TCGA-S3-AA10-01	-5.58134
TCGA-E9-A22G-01	-5.60884
TCGA-C8-A1HE-01	-4.81094
TCGA-E2-A2P5-01	-6.0212
TCGA-AO-A0J9-01	-5.00826
TCGA-AR-A1AK-01	-4.87322
TCGA-C8-A27A-01	-4.48547
TCGA-E9-A5UP-01	-3.97741
TCGA-A2-A0T2-01	-6.08874
TCGA-BH-A0C3-01	-4.64996
TCGA-E2-A1IG-01	-5.80284
TCGA-C8-A1HL-01	-5.09831
TCGA-BH-A208-01	-5.58504
TCGA-A2-A3KD-01	-4.73772
TCGA-A2-A0YK-01	-4.68096
TCGA-BH-A1FR-01	-4.68995
TCGA-BH-A18J-01	-5.75583
TCGA-B6-A0WY-01	-5.92084
TCGA-AR-A24M-01	-4.91246
TCGA-E9-A1NI-01	-5.64322
TCGA-A8-A093-01	-5.71848
TCGA-AC-A6NO-01	-5.68991
TCGA-A8-A09M-01	-4.57972
TCGA-EW-A1OV-01	-5.2459
TCGA-C8-A278-01	-5.20342
TCGA-AR-A1AP-01	-5.20173
TCGA-E2-A1LS-01	-4.50998
TCGA-A8-A09G-01	-4.45306
TCGA-A8-A09R-01	-4.55191
TCGA-GM-A5PX-01	-5.92276
TCGA-E2-A1BD-01	-5.30995
TCGA-E9-A1R2-01	-4.995
TCGA-AC-A62Y-01	-5.10414
TCGA-AC-A2FO-01	-4.89929
TCGA-AR-A1AY-01	-6.00876
TCGA-AR-A2LN-01	-5.04167
TCGA-D8-A27W-01	-4.35809
TCGA-OL-A66O-01	-6.35657
TCGA-BH-A0HU-01	-5.43341
TCGA-AR-A1AH-01	-6.1389
TCGA-A8-A081-01	-4.40792
TCGA-C8-A8HQ-01	-5.62365
TCGA-A2-A04Y-01	-4.66497
TCGA-GM-A2DB-01	-5.29075
TCGA-E9-A3Q9-01	-4.23212
TCGA-A8-A09I-01	-4.97254
TCGA-A8-A07L-01	-5.74953
TCGA-A2-A3XV-01	-6.05682
TCGA-AR-A0TY-01	-5.50962
TCGA-LL-A6FR-01	-6.66324
TCGA-A2-A0CW-01	-5.3009
TCGA-E2-A14O-01	-5.55009
TCGA-D8-A1J9-01	-4.85676
TCGA-A2-A0CQ-01	-4.67327
TCGA-A8-A08Z-01	-5.44419
TCGA-AC-A2FE-01	-5.43775
TCGA-AO-A03N-01	-5.22984
TCGA-EW-A2FW-01	-5.47028
TCGA-AR-A2LL-01	-4.8176
TCGA-AR-A24Q-01	-5.81262
TCGA-AO-A0J3-01	-4.45928
TCGA-AR-A2LK-01	-4.96174
TCGA-A8-A08J-01	-4.91888
TCGA-A2-A0YF-01	-4.6554
TCGA-BH-A0AZ-01	-5.88067
TCGA-E9-A22B-01	-5.37555
TCGA-AC-A3W5-01	-5.65496
TCGA-BH-A0C1-01	-5.25691
TCGA-AN-A0XU-01	-5.10097
TCGA-B6-A0RQ-01	-5.52213
TCGA-D8-A1JL-01	-5.38825
TCGA-D8-A1Y0-01	-4.53531
TCGA-E9-A229-01	-5.37538
TCGA-A8-A07I-01	-4.93095
TCGA-OL-A5RU-01	-5.03916
TCGA-AR-A5QP-01	-5.83445
TCGA-D8-A1XZ-01	-5.23425
TCGA-EW-A1PC-01	-6.10729
TCGA-AO-A0J2-01	-5.89491
TCGA-E2-A1LB-01	-5.3027
TCGA-5T-A9QA-01	-4.9292
TCGA-B6-A40C-01	-5.46967
TCGA-A7-A0CH-01	-5.11391
TCGA-E2-A9RU-01	-6.19576
TCGA-A2-A0D2-01	-6.02502
TCGA-BH-A1FE-06	-5.63624
TCGA-AC-A8OR-01	-5.05022
TCGA-S3-A6ZH-01	-4.65802
TCGA-E2-A14Z-01	-5.7242
TCGA-E2-A1IF-01	-5.91161
TCGA-D8-A27G-01	-5.19858
TCGA-EW-A1PH-01	-5.72433
TCGA-E2-A14Y-01	-5.88051
TCGA-WT-AB41-01	-5.44314
TCGA-AO-A1KQ-01	-5.39421
TCGA-D8-A1JU-01	-5.38222
TCGA-BH-A0DL-01	-5.60048
TCGA-E2-A56Z-01	-5.20285
TCGA-A7-A0D9-01	-4.71624
TCGA-BH-A0DO-01	-5.00194
TCGA-A2-A259-01	-5.17144
TCGA-AN-A0XP-01	-5.15038
TCGA-BH-A202-01	-5.00275
TCGA-A2-A0YJ-01	-5.38887
TCGA-B6-A0RH-01	-6.06215
TCGA-D8-A1XD-01	-5.35795
TCGA-A2-A0T7-01	-5.32385
TCGA-AC-A2FG-01	-5.11549
TCGA-BH-AB28-01	-5.148
TCGA-B6-A0RE-01	-6.29775
TCGA-D8-A1JP-01	-5.30234
TCGA-S3-A6ZF-01	-5.29071
TCGA-AC-A3YJ-01	-5.21046
TCGA-A2-A0YI-01	-4.79185
TCGA-AN-A04C-01	-4.94421
TCGA-B6-A0RO-01	-5.16044
TCGA-A2-A0SX-01	-5.04703
TCGA-E2-A14R-01	-5.25251
TCGA-A7-A0DB-01	-4.11228
TCGA-EW-A1OX-01	-4.45293
TCGA-A7-A26F-01	-4.49103
TCGA-AC-A2QH-01	-4.94775
TCGA-AO-A1KR-01	-5.89467
TCGA-BH-A1ES-01	-5.27461
TCGA-B6-A0IE-01	-5.2572
TCGA-EW-A1P5-01	-5.41704
TCGA-E9-A5UO-01	-4.56758
TCGA-HN-A2NL-01	-5.95937
TCGA-GM-A2DN-01	-4.96115
TCGA-C8-A12V-01	-4.90701
TCGA-EW-A1J2-01	-5.00038
TCGA-AR-A1AR-01	-5.47992
TCGA-PL-A8LV-01	-4.99614
TCGA-D8-A1JF-01	-4.25562
TCGA-AC-A23E-01	-5.7798
TCGA-BH-A0DH-01	-5.26951
TCGA-C8-A12Y-01	-6.10375
TCGA-BH-A0BG-01	-5.39242
TCGA-BH-A18H-01	-5.03029
TCGA-D8-A1JD-01	-5.3082
TCGA-E9-A228-01	-4.64637
TCGA-E9-A3HO-01	-5.53765
TCGA-A2-A0EV-01	-4.96548
TCGA-BH-A0EI-01	-5.40616
TCGA-AN-A0XW-01	-5.25872
TCGA-A8-A09A-01	-4.73532
TCGA-A1-A0SG-01	-5.2909
TCGA-BH-A1F6-01	-5.61944
TCGA-E9-A249-01	-5.18017
TCGA-BH-A1F2-01	-4.70361
TCGA-A8-A096-01	-5.20128
TCGA-AR-A1AI-01	-5.40552
TCGA-AC-A3BB-01	-5.78563
TCGA-BH-A0WA-01	-5.62411
TCGA-AQ-A1H3-01	-4.85485
TCGA-BH-A0E7-01	-4.90649
TCGA-BH-A0RX-01	-5.79339
TCGA-AO-A03U-01	-5.00193
TCGA-AR-A24L-01	-5.17352
TCGA-E2-A1IJ-01	-5.43276
TCGA-E2-A150-01	-5.8048
TCGA-E2-A15H-01	-5.40954
TCGA-BH-A0E0-01	-5.58844
TCGA-A2-A0D1-01	-5.1628
TCGA-A8-A09D-01	-5.33437
TCGA-AQ-A1H2-01	-5.39902
TCGA-D8-A1JH-01	-5.02892
TCGA-GM-A3NW-01	-5.1925
TCGA-A7-A0CD-01	-4.89344
TCGA-A7-A2KD-01	-4.72872
TCGA-AO-A03L-01	-5.69301
TCGA-AR-A2LR-01	-6.01473
TCGA-E2-A14T-01	-4.57316
TCGA-AR-A24U-01	-4.35101
TCGA-BH-A28Q-01	-5.21765
TCGA-C8-A3M7-01	-4.81582
TCGA-BH-A0EE-01	-5.24263
TCGA-3C-AALK-01	-5.6241
TCGA-EW-A1OW-01	-6.34618
TCGA-E2-A108-01	-5.23699
TCGA-A2-A0D4-01	-4.71032
TCGA-E9-A1RA-01	-5.35538
TCGA-V7-A7HQ-01	-6.25536
TCGA-AR-A24X-01	-5.52001
TCGA-D8-A73X-01	-5.42686
TCGA-BH-A0W4-01	-5.71469
TCGA-BH-A1ET-01	-4.89835
TCGA-BH-A0C7-01	-5.62373
TCGA-LD-A7W5-01	-5.686
TCGA-D8-A1XK-01	-6.35959
TCGA-A2-A0T4-01	-5.3757
TCGA-AN-A0FX-01	-5.94397
TCGA-A2-A0D3-01	-5.02716
TCGA-D8-A1XS-01	-4.79947
TCGA-C8-A138-01	-5.2934
TCGA-AR-A24R-01	-4.61106
TCGA-BH-A2L8-01	-5.69509
TCGA-E2-A14V-01	-5.36774
TCGA-AO-A0JE-01	-5.44107
TCGA-A8-A06O-01	-4.50009
TCGA-AO-A0J4-01	-5.17148
TCGA-EW-A1P3-01	-5.10719
TCGA-B6-A0WT-01	-5.20961
TCGA-C8-A26W-01	-5.32383
TCGA-AN-A041-01	-5.10424
TCGA-D8-A1Y3-01	-5.98442
TCGA-B6-A40B-01	-5.93388
TCGA-B6-A1KI-01	-5.10873
TCGA-A8-A090-01	-5.25647
TCGA-BH-A0B6-01	-5.45193
TCGA-A8-A09W-01	-5.14872
TCGA-AO-A03M-01	-5.0532
TCGA-E2-A1L6-01	-5.03073
TCGA-AR-A0TQ-01	-4.75165
TCGA-B6-A0RP-01	-5.32972
TCGA-AN-A0FK-01	-5.40919
TCGA-E9-A22D-01	-4.86451
TCGA-BH-A18L-01	-3.71086
TCGA-E9-A1RG-01	-5.87149
TCGA-D8-A146-01	-5.08169
TCGA-AO-A0JL-01	-4.48141
TCGA-EW-A6SB-01	-5.50276
TCGA-3C-AAAU-01	-4.62037
TCGA-GM-A2DF-01	-5.48752
TCGA-E2-A15J-01	-5.37066
TCGA-EW-A424-01	-6.04349
TCGA-A8-A07Z-01	-5.26736
TCGA-BH-A0BF-01	-5.1579
TCGA-E2-A154-01	-5.46518
TCGA-A8-A08T-01	-4.80092
TCGA-A8-A085-01	-5.63999
TCGA-EW-A1P4-01	-6.31139
TCGA-EW-A1J1-01	-4.48237
TCGA-A8-A084-01	-5.4569
TCGA-E9-A1R7-01	-4.79193
TCGA-AO-A0JA-01	-4.93122
TCGA-A2-A1G4-01	-4.39693
TCGA-C8-A12K-01	-5.402
TCGA-A2-A0CK-01	-5.59984
TCGA-A7-A4SE-01	-6.35183
TCGA-C8-A274-01	-4.49931
TCGA-BH-A0B0-01	-5.49055
TCGA-BH-A1EY-01	-5.03814
TCGA-C8-A12O-01	-5.05384
TCGA-BH-A42U-01	-6.17602
TCGA-AQ-A04H-01	-5.14072
TCGA-A7-A425-01	-5.89813
TCGA-AN-A049-01	-5.60529
TCGA-A8-A06Y-01	-4.80028
TCGA-AR-A2LE-01	-4.4394
TCGA-AC-A23G-01	-6.08099
TCGA-A7-A5ZV-01	-5.62491
TCGA-BH-A0BL-01	-5.48743
TCGA-EW-A1PA-01	-5.18414
TCGA-E9-A1RC-01	-4.78224
TCGA-A2-A1FV-01	-4.50914
TCGA-BH-A0AU-01	-4.96154
TCGA-LL-A73Y-01	-5.03914
TCGA-D8-A1JC-01	-4.6997
TCGA-E2-A1B4-01	-5.75729
TCGA-A2-A0EW-01	-5.14656
TCGA-E9-A1NG-01	-5.80783
TCGA-AR-A1AL-01	-4.96877
TCGA-LD-A7W6-01	-5.38394
TCGA-JL-A3YW-01	-6.12664
TCGA-A2-A1FX-01	-4.9816
TCGA-BH-A1FJ-01	-4.97336
TCGA-A2-A0EX-01	-5.41522
TCGA-A2-A0CM-01	-5.82547
TCGA-GM-A2DA-01	-4.89737
TCGA-B6-A0X7-01	-5.18064
TCGA-AR-A2LQ-01	-5.37058
TCGA-W8-A86G-01	-5.49801
TCGA-BH-A0HO-01	-5.16772
TCGA-BH-A1FU-01	-5.57553
TCGA-A8-A091-01	-4.13275
TCGA-E9-A1N3-01	-4.39816
TCGA-AR-A0U2-01	-4.28473
TCGA-BH-A0W7-01	-5.49557
TCGA-E9-A1R5-01	-5.24834
TCGA-3C-AALI-01	-4.62137
TCGA-E9-A1RI-01	-5.25226
TCGA-A2-A0ER-01	-4.76591
TCGA-3C-AALJ-01	-5.22564
TCGA-E9-A6HE-01	-6.45147
TCGA-A7-A5ZX-01	-5.72744
TCGA-BH-A201-01	-5.68696
TCGA-A2-A04W-01	-5.56209
TCGA-D8-A73W-01	-4.78151
TCGA-A7-A3IY-01	-5.6693
TCGA-OL-A6VR-01	-5.00771
TCGA-EW-A2FR-01	-6.00095
TCGA-BH-A0HP-01	-5.10898
TCGA-AR-A0TP-01	-4.99791
TCGA-C8-A12X-01	-5.47322
TCGA-D8-A1XJ-01	-5.61324
TCGA-AR-A0TZ-01	-4.95538
TCGA-EW-A1OY-01	-5.37389
TCGA-GM-A2DC-01	-4.40392
TCGA-BH-A18N-01	-5.09674
TCGA-E9-A1ND-01	-5.59801
TCGA-D8-A1XR-01	-5.28227
TCGA-A2-A0ES-01	-5.05382
TCGA-C8-A1HO-01	-4.6307
TCGA-LL-A9Q3-01	-5.45246
TCGA-A7-A3J1-01	-4.88091
TCGA-AC-A5EH-01	-5.96212
TCGA-E2-A15O-01	-4.94982
TCGA-AC-A3W6-01	-5.72875
TCGA-AN-A0FD-01	-5.90995
TCGA-BH-A0BM-01	-5.18082
TCGA-E9-A22H-01	-4.76484
TCGA-EW-A1IY-01	-4.80208
TCGA-E9-A3X8-01	-6.14606
TCGA-AR-A24K-01	-5.53254
TCGA-S3-AA11-01	-5.36418
TCGA-EW-A6SA-01	-5.57229
TCGA-A2-A0CP-01	-5.98899
TCGA-B6-A0RU-01	-5.87985
TCGA-B6-A0RS-01	-5.45558
TCGA-A1-A0SN-01	-5.24518
TCGA-EW-A1IZ-01	-5.17719
TCGA-A7-A13F-01	-5.40201
TCGA-D8-A1JT-01	-4.20182
TCGA-D8-A1JM-01	-5.67349
TCGA-BH-A0BQ-01	-5.87862
TCGA-BH-A0EA-01	-5.21849
TCGA-BH-A0BA-01	-4.50362
TCGA-EW-A6SC-01	-5.88043
TCGA-OL-A5DA-01	-5.55806
TCGA-A2-A0T1-01	-5.07743
TCGA-AO-A0JC-01	-4.09865
TCGA-EW-A2FS-01	-4.79778
TCGA-A8-A09K-01	-4.27817
TCGA-E2-A107-01	-5.19601
TCGA-A7-A6VY-01	-6.14335
TCGA-E2-A14Q-01	-5.23929
TCGA-E2-A15A-06	-4.97593
TCGA-B6-A0IB-01	-5.14509
TCGA-A8-A06Q-01	-4.20029
TCGA-GM-A2DK-01	-4.92499
TCGA-5L-AAT0-01	-5.73213
TCGA-A7-A4SC-01	-4.76853
TCGA-A2-A0CR-01	-5.76729
TCGA-AC-A2QJ-01	-6.88578
TCGA-AN-A03X-01	-5.69311
TCGA-AN-A0FL-01	-4.77011
TCGA-BH-A18P-01	-5.10079
TCGA-AC-A3YI-01	-6.04202
TCGA-A2-A0SY-01	-5.35033
TCGA-GM-A2DM-01	-5.16143
TCGA-D8-A1XF-01	-4.29582
TCGA-BH-A1FM-01	-4.65127
TCGA-BH-A0HN-01	-4.83651
TCGA-AN-A0FV-01	-5.48904
TCGA-B6-A0X0-01	-5.82669
TCGA-AO-A03T-01	-4.6175
TCGA-S3-AA15-01	-5.47502
TCGA-AO-A12D-01	-4.65481
TCGA-BH-A0DK-01	-5.26145
TCGA-AO-A124-01	-5.95485
TCGA-E2-A15R-01	-4.69724
TCGA-D8-A1Y1-01	-5.38076
TCGA-A2-A04T-01	-5.15536
TCGA-UU-A93S-01	-5.65754
TCGA-A2-A0T6-01	-5.25465
TCGA-E2-A10F-01	-5.29271
TCGA-EW-A1IW-01	-5.15953
TCGA-E9-A1NC-01	-5.66814
TCGA-AC-A3TM-01	-6.33114
TCGA-E9-A1QZ-01	-4.87565
TCGA-A8-A09C-01	-4.97077
TCGA-D8-A73U-01	-4.50493
TCGA-A8-A07E-01	-5.49899
TCGA-AC-A3TN-01	-5.87857
TCGA-AO-A0JF-01	-5.26169
TCGA-E2-A153-01	-5.42034
TCGA-BH-A0B5-01	-5.26354
TCGA-A8-A07W-01	-4.65179
TCGA-BH-A0B8-01	-5.24872
TCGA-BH-A0B1-01	-4.90631
TCGA-BH-A1FN-01	-5.88712
TCGA-D8-A147-01	-4.90112
TCGA-PL-A8LX-01	-5.20279
TCGA-E9-A1N4-01	-5.04146
TCGA-BH-A18F-01	-5.38696
TCGA-D8-A27F-01	-5.97749
TCGA-A8-A0AB-01	-5.26687
TCGA-AR-A0TS-01	-4.51256
TCGA-BH-A0H9-01	-5.40461
TCGA-A8-A07U-01	-4.56801
TCGA-E2-A14X-01	-4.3391
TCGA-C8-A131-01	-5.77925
TCGA-BH-A1FL-01	-5.17203
TCGA-C8-A12W-01	-5.24367
TCGA-AC-A7VC-01	-7.15608
TCGA-AO-A12E-01	-4.94061
TCGA-E2-A1LI-01	-5.4085
TCGA-AC-A2BM-01	-4.72449
TCGA-A8-A07R-01	-5.9979
TCGA-BH-A0AW-01	-5.09912
TCGA-A7-A426-01	-5.5461
TCGA-BH-A6R8-01	-5.4126
TCGA-AC-A8OS-01	-4.67757
TCGA-A2-A04Q-01	-5.22617
TCGA-A7-A26H-01	-4.8461
TCGA-A7-A4SF-01	-5.0351
TCGA-D8-A27M-01	-4.39754
TCGA-E9-A1NE-01	-4.66117
TCGA-E2-A573-01	-6.19919
TCGA-C8-A1HI-01	-5.07719
TCGA-A7-A6VW-01	-7.1664
TCGA-BH-A0B7-01	-5.14253
TCGA-A8-A0A6-01	-4.7111
TCGA-AO-A0J5-01	-5.23808
TCGA-AO-A12H-01	-5.00603
TCGA-E2-A15G-01	-4.82149
TCGA-GM-A5PV-01	-5.33856
TCGA-E9-A24A-01	-4.8961
TCGA-AR-A2LM-01	-5.15918
TCGA-E2-A1II-01	-5.23021
TCGA-D8-A27P-01	-5.42313
TCGA-EW-A1J3-01	-4.5561
TCGA-B6-A0I8-01	-4.59955
TCGA-AO-A1KS-01	-4.34816
TCGA-A2-A4S2-01	-5.12234
TCGA-BH-A6R9-01	-6.72896
TCGA-BH-A8FZ-01	-5.35061
TCGA-AC-A2FK-01	-4.92607
TCGA-A2-A0T0-01	-6.12199
TCGA-A8-A07S-01	-5.18531
TCGA-GM-A2DI-01	-4.93218
TCGA-E2-A106-01	-5.05084
TCGA-BH-A0E6-01	-5.95565
TCGA-AO-A03V-01	-4.8961
TCGA-AC-A2BK-01	-5.466
TCGA-AR-A254-01	-4.98483
TCGA-AO-A129-01	-5.65055
TCGA-BH-A8FY-01	-4.97949
TCGA-D8-A143-01	-6.31624
TCGA-AC-A3W7-01	-5.65524
TCGA-A8-A06X-01	-5.49632
TCGA-AR-A255-01	-5.16894
TCGA-BH-A0DZ-01	-6.01305
TCGA-C8-A12T-01	-6.23238
TCGA-AO-A12G-01	-5.26189
TCGA-E2-A15L-01	-5.82086
TCGA-AN-A0FF-01	-4.76858
TCGA-A2-A3XX-01	-5.37
TCGA-EW-A1P8-01	-6.29489
TCGA-A8-A097-01	-5.33802
TCGA-BH-A0E1-01	-5.58117
TCGA-BH-A0HF-01	-5.89634
TCGA-E9-A5FL-01	-6.66295
TCGA-AR-A1AW-01	-4.00278
TCGA-AQ-A0Y5-01	-5.48437
TCGA-OK-A5Q2-01	-5.33937
TCGA-E2-A1B6-01	-5.16888
TCGA-A8-A07P-01	-5.20692
TCGA-AR-A0TW-01	-4.7311
TCGA-E9-A1N6-01	-5.83845
TCGA-BH-A1EU-01	-4.24623
TCGA-A2-A0EQ-01	-4.88572
TCGA-A8-A08C-01	-5.42232
TCGA-OL-A5RW-01	-6.33598
TCGA-B6-A0WS-01	-5.48951
TCGA-BH-A42V-01	-5.69514
TCGA-A2-A0YL-01	-5.4169
TCGA-B6-A402-01	-5.16442
TCGA-A7-A0CJ-01	-5.63124
TCGA-E9-A22E-01	-5.79196
TCGA-A2-A3Y0-01	-6.68536
TCGA-AN-A0FZ-01	-5.05134
TCGA-BH-A0DQ-01	-5.55083
TCGA-A8-A07J-01	-5.19485
TCGA-E9-A54X-01	-4.94106
TCGA-B6-A1KC-01	-4.13998
TCGA-BH-A18K-01	-5.47863
TCGA-A2-A0EU-01	-5.48706
TCGA-B6-A0IH-01	-4.85002
TCGA-A2-A0EY-01	-4.96366
TCGA-AO-A0JJ-01	-4.90126
TCGA-C8-A26X-01	-5.27423
TCGA-BH-A18Q-01	-5.01469
TCGA-A8-A092-01	-4.83946
TCGA-S3-AA12-01	-5.105
TCGA-BH-A1EO-01	-4.87634
TCGA-A2-A4RW-01	-5.29104
TCGA-D8-A142-01	-5.4202
TCGA-A2-A0YE-01	-6.25112
TCGA-A2-A04P-01	-5.01812
TCGA-A2-A0CY-01	-5.60472
TCGA-E9-A1RB-01	-5.7101
TCGA-A7-A5ZW-01	-5.88874
TCGA-E2-A1IN-01	-5.58996
TCGA-EW-A6S9-01	-5.51173
TCGA-AR-A5QM-01	-5.07239
TCGA-AO-A0J7-01	-5.50944
TCGA-A2-A3KC-01	-5.19544
TCGA-E2-A15D-01	-4.99086
TCGA-A2-A0YG-01	-4.83177
TCGA-AO-A03O-01	-5.01236
TCGA-OL-A66N-01	-5.48446
TCGA-B6-A0I2-01	-5.41829
TCGA-E2-A572-01	-5.90862
TCGA-EW-A1PG-01	-6.10379
TCGA-A7-A26G-01	-5.11903
TCGA-B6-A0WV-01	-5.1509
TCGA-AO-A0JM-01	-5.5644
TCGA-D8-A1X7-01	-4.64695
TCGA-C8-A3M8-01	-5.03747
TCGA-LL-A5YN-01	-5.47736
TCGA-B6-A0RG-01	-5.59734
TCGA-AC-A3OD-01	-2.58375
TCGA-A8-A08O-01	-5.60733
TCGA-A8-A07B-01	-4.62146
TCGA-A8-A08L-01	-5.27286
TCGA-E2-A15I-01	-4.4285
TCGA-BH-A0HQ-01	-5.4333
TCGA-AR-A24V-01	-5.50878
TCGA-EW-A1P1-01	-5.45251
TCGA-EW-A3E8-01	-5.24739
TCGA-A8-A07O-01	-6.13195
TCGA-AN-A04D-01	-5.29257
TCGA-E9-A2JT-01	-4.24155
TCGA-A2-A4S3-01	-5.48108
TCGA-AN-A0AK-01	-5.60639
TCGA-AO-A1KO-01	-4.54885
TCGA-BH-A1ES-06	-4.53497
TCGA-AR-A1AV-01	-5.08832
TCGA-A2-A0D0-01	-6.58294
TCGA-A7-A13G-01	-3.41686
TCGA-AC-A2QI-01	-5.39357
TCGA-AC-A2FM-01	-4.78601
TCGA-B6-A0X5-01	-4.66097
TCGA-C8-A12L-01	-5.09522
TCGA-AN-A0AS-01	-5.47246
TCGA-A8-A0A2-01	-4.74194
TCGA-LQ-A4E4-01	-4.91386
TCGA-A1-A0SI-01	-5.7058
TCGA-BH-A5J0-01	-5.85384
TCGA-D8-A1Y2-01	-5.62927
TCGA-A7-A3RF-01	-5.18848
TCGA-A2-A0T5-01	-5.95117
TCGA-BH-A1F5-01	-4.31381
TCGA-LD-A66U-01	-6.27849
TCGA-E9-A3QA-01	-5.39926
TCGA-AO-A12F-01	-6.10052
TCGA-A2-A25E-01	-4.73624
TCGA-A8-A0A4-01	-4.97238
TCGA-EW-A1J6-01	-4.39153
TCGA-C8-A8HR-01	-5.60497
TCGA-BH-A0BV-01	-5.12526
TCGA-D8-A27T-01	-5.60492
TCGA-E9-A1RE-01	-4.7779
TCGA-A2-A0T3-01	-5.16328
TCGA-E2-A15E-01	-5.1693
TCGA-E9-A1N5-01	-5.43666
TCGA-B6-A0RV-01	-5.48767
TCGA-E2-A15P-01	-5.02157
TCGA-AC-A3EH-01	-5.86152
TCGA-BH-A1FB-01	-4.88747
TCGA-A8-A07C-01	-5.34257
TCGA-E9-A5FK-01	-5.54477
TCGA-A2-A0CO-01	-5.0582
TCGA-A8-A0A9-01	-5.46243
TCGA-C8-A1HF-01	-5.9592
TCGA-AQ-A54O-01	-4.97117
TCGA-S3-AA17-01	-4.49504
TCGA-MS-A51U-01	-5.15409
TCGA-AC-A62V-01	-6.45017
TCGA-GI-A2C8-01	-4.76585
TCGA-BH-A18S-01	-4.71059
TCGA-EW-A1P7-01	-5.28108
TCGA-A8-A08P-01	-5.20412
TCGA-A8-A095-01	-5.23297
TCGA-EW-A1P0-01	-4.83119
TCGA-A2-A4S1-01	-5.88997
TCGA-AR-A0U3-01	-4.99848
TCGA-BH-A0EB-01	-5.28768
TCGA-E9-A54Y-01	-4.53004
TCGA-D8-A1XU-01	-4.78572
TCGA-OL-A66J-01	-5.50927
TCGA-EW-A1PD-01	-5.21814
TCGA-BH-A0BC-01	-5.52508
TCGA-AC-A23H-01	-5.50003
TCGA-D8-A1XC-01	-3.96253
TCGA-AN-A0XV-01	-4.97275
TCGA-A8-A08G-01	-4.80126
TCGA-A2-A1FW-01	-4.19229
TCGA-LL-A5YO-01	-5.26874
TCGA-E9-A1RF-01	-5.04007
TCGA-XX-A899-01	-5.24043
TCGA-E2-A15K-06	-4.36698
TCGA-AO-A0JI-01	-4.4751
TCGA-AN-A0AM-01	-5.78894
TCGA-AO-A128-01	-4.95483
TCGA-C8-A12N-01	-5.75643
TCGA-A7-A6VX-01	-5.54661
TCGA-C8-A133-01	-5.0233
TCGA-A2-A0CS-01	-5.78606
TCGA-E2-A15K-01	-5.11179
TCGA-A8-A083-01	-5.04072
TCGA-XX-A89A-01	-5.41165
TCGA-BH-A28O-01	-5.51627
TCGA-B6-A0IC-01	-5.02087
TCGA-B6-A401-01	-5.40592
TCGA-AN-A0XS-01	-5.26966
TCGA-A7-A0CG-01	-5.09326
TCGA-A1-A0SM-01	-5.46043
TCGA-D8-A27R-01	-5.63145
TCGA-GM-A2DD-01	-5.31843
TCGA-LL-A740-01	-5.85152
TCGA-AR-A24T-01	-5.17044
TCGA-BH-A0H0-01	-4.05124
TCGA-A8-A09T-01	-5.54485
TCGA-B6-A0WW-01	-5.07435
TCGA-OL-A66L-01	-6.3155
TCGA-A8-A0A7-01	-4.49352
TCGA-A7-A4SA-01	-4.84155
TCGA-A2-A0EN-01	-4.95373
TCGA-B6-A0IO-01	-4.8571
TCGA-AC-A8OQ-01	-5.12069
TCGA-D8-A27E-01	-4.6144
TCGA-BH-A8G0-01	-5.123
TCGA-A2-A3XW-01	-6.14516
TCGA-BH-A0DP-01	-5.26146
TCGA-PE-A5DD-01	-5.59215
TCGA-OL-A66K-01	-5.51154
TCGA-BH-A1FG-01	-4.71406
TCGA-A2-A25D-01	-5.03302
TCGA-S3-AA14-01	-5.39951
TCGA-LL-A440-01	-5.1676
TCGA-A2-A0SW-01	-4.76615
TCGA-D8-A1XW-01	-4.08687
TCGA-B6-A2IU-01	-4.74712
TCGA-GM-A2DO-01	-4.43696
TCGA-B6-A0IA-01	-5.24908
TCGA-C8-A26Y-01	-5.09036
TCGA-AN-A0G0-01	-5.23424
TCGA-AO-A0JG-01	-4.67391
TCGA-E2-A1LH-01	-4.95422
TCGA-AN-A0FY-01	-5.83526
TCGA-E2-A1L9-01	-5.65292
TCGA-BH-A0W5-01	-4.82048
TCGA-AQ-A54N-01	-5.69048
TCGA-GM-A3NY-01	-5.09137
TCGA-A8-A09E-01	-5.42877
TCGA-AR-A0TX-01	-4.83008
TCGA-AQ-A04J-01	-5.13447
TCGA-AR-A2LJ-01	-5.9658
TCGA-OL-A66H-01	-5.63634
TCGA-AC-A23C-01	-4.83415
TCGA-D8-A1XQ-01	-5.35662
TCGA-E2-A156-01	-5.20126
TCGA-AC-A6IV-01	-5.09511
TCGA-E2-A15E-06	-4.52078
TCGA-D8-A1X6-01	-4.90295
TCGA-A8-A0AD-01	-5.04225
TCGA-A8-A07G-01	-5.14174
TCGA-C8-A130-01	-5.5658
TCGA-AN-A046-01	-5.23462
TCGA-E2-A1AZ-01	-5.52639
TCGA-B6-A400-01	-5.9569
TCGA-Z7-A8R5-01	-6.03348
TCGA-E2-A155-01	-4.68658
TCGA-E2-A109-01	-4.80103
TCGA-BH-A1EN-01	-4.49515
TCGA-AR-A1AQ-01	-5.83965
TCGA-E2-A574-01	-6.43275
TCGA-A2-A1G0-01	-4.46349
TCGA-AC-A4ZE-01	-4.78744
TCGA-AR-A24O-01	-5.10394
TCGA-BH-A0AV-01	-6.30364
TCGA-C8-A137-01	-5.74207
TCGA-B6-A0RL-01	-5.00077
TCGA-OL-A5RV-01	-5.25123
TCGA-B6-A0IM-01	-5.25215
TCGA-B6-A0IK-01	-5.58215
TCGA-B6-A0WX-01	-6.06562
TCGA-AR-A24H-01	-5.03345
TCGA-B6-A0IQ-01	-6.10946
TCGA-D8-A27N-01	-5.45493
TCGA-C8-A275-01	-4.68291
TCGA-B6-A0IG-01	-5.44792
TCGA-E9-A243-01	-4.65453
TCGA-D8-A1JE-01	-4.84439
TCGA-E2-A1LE-01	-6.12679
TCGA-AC-A6IX-01	-5.32806
TCGA-A8-A09Q-01	-4.92923
TCGA-AN-A0AL-01	-5.54316
TCGA-A2-A4RY-01	-5.41002
TCGA-AR-A5QQ-01	-7.36223
TCGA-D8-A140-01	-4.31374
TCGA-A2-A0YH-01	-4.91149
TCGA-B6-A3ZX-01	-4.99946
TCGA-A1-A0SE-01	-5.53602
TCGA-AR-A1AN-01	-5.44324
TCGA-A8-A08R-01	-4.73059
TCGA-OL-A5RX-01	-5.69876
TCGA-AR-A2LO-01	-5.10665
TCGA-BH-A0BD-01	-5.29278
TCGA-AR-A24N-01	-5.01212
TCGA-AR-A2LH-01	-5.24537
TCGA-AR-A1AO-01	-5.28746
TCGA-BH-A1EW-01	-4.6358
TCGA-BH-A0W3-01	-5.02623
TCGA-EW-A1PF-01	-5.2974
TCGA-S3-A6ZG-01	-4.623
TCGA-E9-A22A-01	-5.65312
TCGA-A2-A0YT-01	-4.85113
TCGA-B6-A0IN-01	-4.80977
TCGA-C8-A1HJ-01	-5.61583
TCGA-AQ-A7U7-01	-4.93294
TCGA-D8-A1JI-01	-4.63966
TCGA-GM-A2D9-01	-5.48779
TCGA-A8-A06R-01	-5.36827
TCGA-AR-A1AT-01	-5.16295
TCGA-AO-A1KP-01	-4.78052
TCGA-AN-A0AJ-01	-5.50065
TCGA-A8-A07F-01	-4.9936
TCGA-GM-A3XG-01	-5.9562
TCGA-AR-A0TV-01	-4.78158
TCGA-A2-A3XY-01	-6.05796
TCGA-BH-A0DD-01	-5.10277
TCGA-A2-A1FZ-01	-5.20141
TCGA-D8-A13Z-01	-5.4659
TCGA-A2-A25C-01	-5.02552
TCGA-AN-A0XR-01	-5.66524
TCGA-B6-A0RN-01	-5.83114
TCGA-AC-A2FB-01	-4.4577
TCGA-AC-A7VB-01	-5.44179
TCGA-A2-A0YM-01	-5.96722
TCGA-OL-A5D8-01	-5.25632
TCGA-D8-A1XL-01	-5.70971
TCGA-AR-A252-01	-4.23023
TCGA-BH-A18G-01	-5.55878
TCGA-OL-A5D6-01	-5.64819
TCGA-A8-A086-01	-5.39747

## Sheet: Doxorubicin
TCGA-D8-A1XO-01	-1.99796
TCGA-AN-A0FN-01	-2.02694
TCGA-AC-A62X-01	-2.63086
TCGA-E2-A14U-01	-1.9916
TCGA-E9-A1R3-01	-2.097
TCGA-BH-A18M-01	-2.09326
TCGA-E2-A15T-01	-1.79366
TCGA-AR-A0TU-01	-2.71031
TCGA-EW-A1IX-01	-1.85394
TCGA-B6-A408-01	-2.05616
TCGA-E2-A1IE-01	-1.13653
TCGA-E2-A10E-01	-2.16567
TCGA-EW-A3U0-01	-2.17447
TCGA-BH-A0H5-01	-2.09489
TCGA-E2-A14W-01	-1.28727
TCGA-AQ-A04L-01	-1.32121
TCGA-BH-A1FD-01	-1.52356
TCGA-AR-A0TR-01	-1.61929
TCGA-A7-A0CE-01	-2.26762
TCGA-AO-A0J8-01	-1.92237
TCGA-BH-A1F0-01	-2.16434
TCGA-A2-A0SU-01	-1.75607
TCGA-AC-A2FF-01	-1.76147
TCGA-LL-A6FP-01	-1.21878
TCGA-E2-A15S-01	-1.52298
TCGA-E2-A14N-01	-2.44088
TCGA-D8-A1JK-01	-0.766805
TCGA-D8-A3Z6-01	-1.8745
TCGA-A8-A06U-01	-1.66004
TCGA-A7-A13E-01	-2.17994
TCGA-UL-AAZ6-01	-1.26026
TCGA-B6-A0I9-01	-1.37692
TCGA-A8-A099-01	-2.16068
TCGA-OL-A5RY-01	-1.92854
TCGA-E9-A1NA-01	-2.25947
TCGA-D8-A1XV-01	-1.11132
TCGA-BH-A18T-01	-2.28671
TCGA-B6-A0RT-01	-2.1232
TCGA-A1-A0SJ-01	-0.812061
TCGA-E9-A247-01	-2.28697
TCGA-C8-A12P-01	-1.50296
TCGA-A8-A09X-01	-1.6733
TCGA-BH-A1FC-01	-2.29999
TCGA-A8-A082-01	-1.29374
TCGA-C8-A12M-01	-1.46115
TCGA-BH-A1EV-01	-1.86988
TCGA-C8-A135-01	-1.57586
TCGA-WT-AB44-01	-1.74516
TCGA-A7-A3J0-01	-1.05143
TCGA-E9-A1R0-01	-1.72548
TCGA-B6-A0IJ-01	-1.68607
TCGA-LL-A441-01	-2.32107
TCGA-A2-A3XT-01	-1.76906
TCGA-D8-A27I-01	-1.83369
TCGA-A8-A094-01	-1.03335
TCGA-A2-A1G6-01	-2.27613
TCGA-BH-A0GY-01	-1.53639
TCGA-E2-A1B0-01	-1.61021
TCGA-E9-A1RH-01	-1.34572
TCGA-C8-A1HG-01	-1.35054
TCGA-A1-A0SB-01	-2.81033
TCGA-A7-A0DC-01	-1.31641
TCGA-A7-A3IZ-01	-1.52154
TCGA-LL-A5YL-01	-1.87982
TCGA-BH-A0DI-01	-1.44316
TCGA-E2-A1B1-01	-1.86512
TCGA-BH-A0H3-01	-2.14798
TCGA-D8-A27K-01	-2.21365
TCGA-A2-A04U-01	-2.42046
TCGA-AO-A0J6-01	-2.23149
TCGA-BH-A0E2-01	-1.91092
TCGA-E2-A1L8-01	-2.06511
TCGA-OL-A5RZ-01	-1.93184
TCGA-B6-A1KF-01	-1.8009
TCGA-E2-A1L7-01	-1.58021
TCGA-B6-A0I6-01	-1.95817
TCGA-AN-A0XL-01	-1.49056
TCGA-A8-A08B-01	-2.07886
TCGA-AC-A6IX-06	-1.65338
TCGA-E2-A2P6-01	-1.29869
TCGA-E2-A3DX-01	-1.74708
TCGA-E2-A159-01	-2.06904
TCGA-E9-A1NH-01	-2.19668
TCGA-A8-A0A1-01	-1.8671
TCGA-D8-A4Z1-01	-2.03935
TCGA-AR-A1AS-01	-1.91489
TCGA-AR-A24P-01	-1.83853
TCGA-A8-A09Z-01	-1.52587
TCGA-BH-A0HL-01	-0.814161
TCGA-A8-A08X-01	-1.52801
TCGA-A8-A09V-01	-1.99328
TCGA-D8-A1XT-01	-2.12485
TCGA-GM-A4E0-01	-1.42738
TCGA-AN-A0XN-01	-1.65374
TCGA-A2-A04V-01	-1.54015
TCGA-A7-A26I-01	-1.61712
TCGA-A2-A3XS-01	-1.87804
TCGA-BH-A0BP-01	-1.33505
TCGA-AC-A3QQ-01	-1.19202
TCGA-AO-A12C-01	-1.93051
TCGA-E2-A1IH-01	-2.09291
TCGA-BH-A0DS-01	-1.61429
TCGA-AN-A0FS-01	-1.97115
TCGA-E2-A15F-01	-1.41449
TCGA-BH-A0H7-01	-1.26758
TCGA-A8-A079-01	-1.01222
TCGA-D8-A1XY-01	-1.69907
TCGA-AO-A0JD-01	-1.62083
TCGA-B6-A0WZ-01	-1.62994
TCGA-D8-A1XB-01	-1.9856
TCGA-BH-A0BS-01	-1.69734
TCGA-BH-A1EX-01	-1.59071
TCGA-D8-A1X8-01	-1.84962
TCGA-HN-A2OB-01	-1.86102
TCGA-B6-A0I1-01	-2.05333
TCGA-OL-A97C-01	-1.91147
TCGA-E2-A1LK-01	-2.34783
TCGA-D8-A1J8-01	-2.00005
TCGA-A8-A06P-01	-1.48196
TCGA-D8-A3Z5-01	-1.91245
TCGA-E2-A152-01	-1.32566
TCGA-BH-A0DT-01	-2.18061
TCGA-A1-A0SQ-01	-0.645073
TCGA-BH-A1FE-01	-2.10737
TCGA-BH-A0BR-01	-1.55913
TCGA-BH-A18V-01	-2.09943
TCGA-GM-A3XN-01	-1.89593
TCGA-A8-A09B-01	-1.73599
TCGA-PL-A8LY-01	-2.38853
TCGA-E2-A10A-01	-2.1446
TCGA-A7-A6VV-01	-1.96362
TCGA-BH-A0BW-01	-1.637
TCGA-AN-A04A-01	-1.60413
TCGA-OL-A66P-01	-0.971536
TCGA-A2-A0SV-01	-1.68574
TCGA-E2-A1LG-01	-2.16077
TCGA-E2-A1LL-01	-2.43586
TCGA-A2-A0ET-01	-1.67143
TCGA-B6-A0RI-01	-1.80336
TCGA-BH-A0GZ-01	-1.33958
TCGA-A2-A25A-01	-2.18086
TCGA-A8-A06N-01	-0.837588
TCGA-EW-A1J5-01	-2.03067
TCGA-D8-A27V-01	-2.11578
TCGA-A2-A0ST-01	-2.00394
TCGA-A2-A0CT-01	-1.31252
TCGA-AR-A0TT-01	-2.0744
TCGA-LL-A8F5-01	-1.68339
TCGA-AN-A0FW-01	-1.56619
TCGA-BH-A18U-01	-1.58942
TCGA-E9-A248-01	-1.87281
TCGA-A2-A0CU-01	-1.01775
TCGA-BH-A0HY-01	-1.34945
TCGA-D8-A1XG-01	-1.6378
TCGA-BH-A204-01	-1.60415
TCGA-AR-A0U4-01	-1.87559
TCGA-E2-A14S-01	-1.33196
TCGA-D8-A1JS-01	-1.66585
TCGA-C8-A1HK-01	-1.46311
TCGA-AR-A250-01	-1.51072
TCGA-EW-A1PB-01	-1.84735
TCGA-AC-A2B8-01	-1.86235
TCGA-A8-A08I-01	-1.0732
TCGA-BH-A18V-06	-1.83558
TCGA-LL-A6FQ-01	-1.51044
TCGA-A1-A0SP-01	-2.15762
TCGA-LL-A442-01	-1.39223
TCGA-A2-A3XU-01	-2.16296
TCGA-A2-A25B-01	-1.83795
TCGA-AO-A1KT-01	-1.55657
TCGA-B6-A1KN-01	-1.92828
TCGA-LL-A5YP-01	-1.80368
TCGA-AR-A1AU-01	-1.35888
TCGA-A7-A26J-01	-2.21981
TCGA-E9-A245-01	-1.29603
TCGA-BH-A42T-01	-1.90393
TCGA-A2-A0EM-01	-1.87086
TCGA-PE-A5DC-01	-1.95064
TCGA-A7-A13D-01	-1.49837
TCGA-BH-A0HK-01	-1.44894
TCGA-B6-A0IP-01	-2.13827
TCGA-D8-A1XA-01	-1.66642
TCGA-D8-A1X5-01	-1.22103
TCGA-D8-A27L-01	-2.00261
TCGA-D8-A1JJ-01	-1.57252
TCGA-A2-A1G1-01	-2.1929
TCGA-E2-A1IL-01	-2.00983
TCGA-A7-A4SB-01	-1.0673
TCGA-A7-A13H-01	-2.0194
TCGA-BH-A0AY-01	-1.66011
TCGA-A8-A075-01	-1.52748
TCGA-E2-A158-01	-2.43113
TCGA-BH-A0B4-01	-1.68497
TCGA-BH-A0DV-01	-1.79302
TCGA-A2-A0EP-01	-1.86795
TCGA-EW-A1PE-01	-1.8549
TCGA-LL-A73Z-01	-2.02898
TCGA-AR-A1AJ-01	-2.31779
TCGA-E9-A227-01	-1.78563
TCGA-AO-A0JB-01	-0.895279
TCGA-A8-A09N-01	-1.97136
TCGA-E2-A15A-01	-1.30202
TCGA-A8-A08A-01	-1.64031
TCGA-AC-A5XS-01	-1.78757
TCGA-BH-A209-01	-2.17077
TCGA-AR-A24S-01	-1.91041
TCGA-A7-A26E-01	-2.00088
TCGA-EW-A1P6-01	-1.78055
TCGA-C8-A1HM-01	-2.16139
TCGA-OL-A6VQ-01	-2.10642
TCGA-E2-A1B5-01	-1.66869
TCGA-A2-A0CV-01	-2.31828
TCGA-5L-AAT1-01	-2.08867
TCGA-B6-A0X4-01	-1.23588
TCGA-E2-A105-01	-1.72176
TCGA-AC-A3HN-01	-1.86293
TCGA-A1-A0SO-01	-2.36557
TCGA-E2-A10B-01	-1.83711
TCGA-A1-A0SH-01	-1.3919
TCGA-E9-A2JS-01	-1.10029
TCGA-A2-A04R-01	-1.3808
TCGA-C8-A12Q-01	-1.32509
TCGA-AN-A0FT-01	-1.08156
TCGA-4H-AAAK-01	-2.10535
TCGA-E2-A15M-01	-1.75134
TCGA-A8-A08H-01	-1.70555
TCGA-C8-A273-01	-1.60327
TCGA-BH-A0DE-01	-1.45898
TCGA-C8-A12U-01	-1.21982
TCGA-A2-A0EO-01	-1.54332
TCGA-AC-A6IW-01	-2.46708
TCGA-LL-A50Y-01	-1.82923
TCGA-A7-A0DA-01	-2.00088
TCGA-GM-A2DL-01	-1.85094
TCGA-E9-A244-01	-2.14647
TCGA-E2-A15C-01	-1.83121
TCGA-BH-A0BT-01	-2.16871
TCGA-BH-A0E9-01	-2.17141
TCGA-BH-A18I-01	-2.07399
TCGA-BH-A0HI-01	-1.9578
TCGA-A2-A0CZ-01	-1.76288
TCGA-D8-A1X9-01	-1.73815
TCGA-BH-A18R-01	-1.64702
TCGA-AO-A12B-01	-1.35588
TCGA-BH-A0B3-01	-1.92491
TCGA-C8-A8HP-01	-1.34355
TCGA-AR-A1AM-01	-2.09384
TCGA-A2-A4S0-01	-0.91731
TCGA-AO-A126-01	-1.48571
TCGA-AR-A5QN-01	-1.9249
TCGA-A8-A08F-01	-1.21926
TCGA-PE-A5DE-01	-1.89879
TCGA-A8-A076-01	-1.76684
TCGA-A2-A3XZ-01	-1.88561
TCGA-AR-A256-01	-2.21018
TCGA-BH-A0DG-01	-1.58552
TCGA-C8-A26Z-01	-1.39682
TCGA-BH-A0HW-01	-1.41976
TCGA-A1-A0SD-01	-2.05683
TCGA-A2-A0CX-01	-1.63136
TCGA-AO-A03R-01	-1.37325
TCGA-PL-A8LZ-01	-2.38374
TCGA-BH-A1F8-01	-1.60101
TCGA-BH-A0BZ-01	-1.69101
TCGA-AC-A8OP-01	-1.84928
TCGA-GI-A2C9-01	-1.92167
TCGA-AO-A125-01	-1.73774
TCGA-EW-A1OZ-01	-1.66876
TCGA-BH-A0C0-01	-1.53874
TCGA-AN-A03Y-01	-1.5577
TCGA-D8-A145-01	-1.76879
TCGA-OL-A66I-01	-2.37449
TCGA-OL-A5S0-01	-2.27771
TCGA-B6-A0I5-01	-1.60668
TCGA-Z7-A8R6-01	-1.92473
TCGA-LD-A9QF-01	-1.8617
TCGA-C8-A134-01	-1.59012
TCGA-AN-A0XT-01	-1.62494
TCGA-BH-A0HA-01	-1.743
TCGA-AR-A251-01	-2.02791
TCGA-C8-A26V-01	-1.69151
TCGA-OL-A5D7-01	-2.47428
TCGA-E2-A1IU-01	-1.50357
TCGA-AN-A0XO-01	-1.90468
TCGA-AN-A0AR-01	-2.17229
TCGA-E2-A1IO-01	-1.69307
TCGA-D8-A27H-01	-1.83666
TCGA-A7-A56D-01	-1.46193
TCGA-GM-A3XL-01	-2.24524
TCGA-BH-A0DX-01	-1.56071
TCGA-A2-A4RX-01	-1.99586
TCGA-B6-A0X1-01	-1.7483
TCGA-S3-AA0Z-01	-2.79188
TCGA-BH-A1FH-01	-1.82909
TCGA-AR-A24W-01	-1.93218
TCGA-A8-A06T-01	-1.92108
TCGA-B6-A0RM-01	-1.44796
TCGA-A2-A04N-01	-1.83308
TCGA-E9-A226-01	-1.91318
TCGA-BH-A0BJ-01	-1.73626
TCGA-E2-A10C-01	-1.65849
TCGA-BH-A5IZ-01	-2.20527
TCGA-E9-A1RD-01	-1.98356
TCGA-AC-A5XU-01	-1.41264
TCGA-E2-A576-01	-1.8081
TCGA-E9-A295-01	-1.85993
TCGA-LD-A74U-01	-1.80589
TCGA-E2-A570-01	-2.00893
TCGA-E9-A1NF-01	-1.7124
TCGA-E9-A1R4-01	-1.30381
TCGA-B6-A409-01	-1.85081
TCGA-EW-A423-01	-0.997835
TCGA-OL-A6VO-01	-2.49861
TCGA-EW-A6SD-01	-1.55148
TCGA-GM-A2DH-01	-2.19656
TCGA-LL-A5YM-01	-1.08707
TCGA-BH-A0H6-01	-1.50581
TCGA-E9-A1N8-01	-2.5655
TCGA-AR-A24Z-01	-1.60981
TCGA-A7-A4SD-01	-2.13835
TCGA-AR-A0U0-01	-2.02491
TCGA-BH-A203-01	-1.5749
TCGA-E2-A1IK-01	-1.42673
TCGA-D8-A13Y-01	-1.00485
TCGA-AR-A1AX-01	-1.72138
TCGA-E9-A1N9-01	-2.06274
TCGA-C8-A1HN-01	-1.34421
TCGA-A2-A0YC-01	-1.82444
TCGA-A2-A0CL-01	-2.02625
TCGA-D8-A1JA-01	-1.67184
TCGA-D8-A1XM-01	-1.88541
TCGA-A2-A04X-01	-1.96859
TCGA-AO-A12A-01	-2.24989
TCGA-E2-A1BC-01	-1.85887
TCGA-A2-A25F-01	-2.20623
TCGA-EW-A2FV-01	-1.86354
TCGA-C8-A132-01	-2.09537
TCGA-AN-A0AT-01	-2.25225
TCGA-AC-A3QP-01	-2.01035
TCGA-E9-A1R6-01	-1.30922
TCGA-C8-A27B-01	-2.19349
TCGA-E2-A14P-01	-1.62666
TCGA-LL-A7SZ-01	-1.1377
TCGA-BH-A0BO-01	-2.00609
TCGA-BH-A0HX-01	-1.41192
TCGA-A1-A0SF-01	-1.63813
TCGA-BH-A0B9-01	-2.34703
TCGA-D8-A1JG-01	-1.43575
TCGA-D8-A1JN-01	-1.76847
TCGA-A8-A06Z-01	-0.468007
TCGA-A2-A0YD-01	-2.27021
TCGA-D8-A1JB-01	-1.86188
TCGA-JL-A3YX-01	-2.07037
TCGA-A1-A0SK-01	-1.91161
TCGA-AO-A03P-01	-2.06199
TCGA-E2-A1LA-01	-1.58339
TCGA-AN-A0FJ-01	-1.84554
TCGA-LL-A7T0-01	-1.8409
TCGA-D8-A141-01	-2.44692
TCGA-BH-A0HB-01	-1.38103
TCGA-C8-A12Z-01	-1.75263
TCGA-A8-A08S-01	-1.98019
TCGA-S3-AA10-01	-2.61899
TCGA-E9-A22G-01	-2.45832
TCGA-C8-A1HE-01	-1.83716
TCGA-E2-A2P5-01	-2.18786
TCGA-AO-A0J9-01	-1.57213
TCGA-AR-A1AK-01	-1.99143
TCGA-C8-A27A-01	-1.38481
TCGA-E9-A5UP-01	-1.448
TCGA-A2-A0T2-01	-1.39509
TCGA-BH-A0C3-01	-1.28297
TCGA-E2-A1IG-01	-1.86536
TCGA-C8-A1HL-01	-1.48759
TCGA-BH-A208-01	-1.36557
TCGA-A2-A3KD-01	-1.41717
TCGA-A2-A0YK-01	-1.96911
TCGA-BH-A1FR-01	-1.24611
TCGA-BH-A18J-01	-1.83994
TCGA-B6-A0WY-01	-2.18069
TCGA-AR-A24M-01	-2.02024
TCGA-E9-A1NI-01	-1.79305
TCGA-A8-A093-01	-1.6431
TCGA-AC-A6NO-01	-2.21592
TCGA-A8-A09M-01	-1.55409
TCGA-EW-A1OV-01	-2.07589
TCGA-C8-A278-01	-1.70338
TCGA-AR-A1AP-01	-1.59146
TCGA-E2-A1LS-01	-0.912038
TCGA-A8-A09G-01	-1.58682
TCGA-A8-A09R-01	-1.31826
TCGA-GM-A5PX-01	-2.11395
TCGA-E2-A1BD-01	-1.69723
TCGA-E9-A1R2-01	-1.62881
TCGA-AC-A62Y-01	-1.46727
TCGA-AC-A2FO-01	-1.77873
TCGA-AR-A1AY-01	-1.95559
TCGA-AR-A2LN-01	-1.98449
TCGA-D8-A27W-01	-1.15177
TCGA-OL-A66O-01	-1.83088
TCGA-BH-A0HU-01	-2.02337
TCGA-AR-A1AH-01	-2.41967
TCGA-A8-A081-01	-1.26523
TCGA-C8-A8HQ-01	-1.91524
TCGA-A2-A04Y-01	-1.32032
TCGA-GM-A2DB-01	-1.2067
TCGA-E9-A3Q9-01	-1.08703
TCGA-A8-A09I-01	-1.7443
TCGA-A8-A07L-01	-2.08399
TCGA-A2-A3XV-01	-1.25774
TCGA-AR-A0TY-01	-1.38547
TCGA-LL-A6FR-01	-2.03051
TCGA-A2-A0CW-01	-1.46528
TCGA-E2-A14O-01	-1.3309
TCGA-D8-A1J9-01	-1.38397
TCGA-A2-A0CQ-01	-1.61565
TCGA-A8-A08Z-01	-2.16532
TCGA-AC-A2FE-01	-2.12156
TCGA-AO-A03N-01	-1.37843
TCGA-EW-A2FW-01	-1.45194
TCGA-AR-A2LL-01	-1.76079
TCGA-AR-A24Q-01	-2.23811
TCGA-AO-A0J3-01	-0.981784
TCGA-AR-A2LK-01	-1.71173
TCGA-A8-A08J-01	-1.29818
TCGA-A2-A0YF-01	-1.68279
TCGA-BH-A0AZ-01	-1.79933
TCGA-E9-A22B-01	-1.08963
TCGA-AC-A3W5-01	-1.78312
TCGA-BH-A0C1-01	-1.94017
TCGA-AN-A0XU-01	-2.08556
TCGA-B6-A0RQ-01	-2.06974
TCGA-D8-A1JL-01	-2.24256
TCGA-D8-A1Y0-01	-1.90515
TCGA-E9-A229-01	-2.06675
TCGA-A8-A07I-01	-1.76942
TCGA-OL-A5RU-01	-1.82338
TCGA-AR-A5QP-01	-2.03014
TCGA-D8-A1XZ-01	-1.69266
TCGA-EW-A1PC-01	-2.34249
TCGA-AO-A0J2-01	-1.44278
TCGA-E2-A1LB-01	-1.17375
TCGA-5T-A9QA-01	-1.48936
TCGA-B6-A40C-01	-1.66639
TCGA-A7-A0CH-01	-1.93079
TCGA-E2-A9RU-01	-1.54882
TCGA-A2-A0D2-01	-1.96936
TCGA-BH-A1FE-06	-2.06017
TCGA-AC-A8OR-01	-1.72981
TCGA-S3-A6ZH-01	-1.01888
TCGA-E2-A14Z-01	-2.06658
TCGA-E2-A1IF-01	-1.8448
TCGA-D8-A27G-01	-1.60954
TCGA-EW-A1PH-01	-2.2511
TCGA-E2-A14Y-01	-2.10726
TCGA-WT-AB41-01	-1.659
TCGA-AO-A1KQ-01	-1.44368
TCGA-D8-A1JU-01	-1.93948
TCGA-BH-A0DL-01	-2.16492
TCGA-E2-A56Z-01	-1.34072
TCGA-A7-A0D9-01	-1.3734
TCGA-BH-A0DO-01	-1.70571
TCGA-A2-A259-01	-1.85218
TCGA-AN-A0XP-01	-2.00834
TCGA-BH-A202-01	-1.72367
TCGA-A2-A0YJ-01	-1.72626
TCGA-B6-A0RH-01	-1.92954
TCGA-D8-A1XD-01	-1.52836
TCGA-A2-A0T7-01	-2.15635
TCGA-AC-A2FG-01	-1.89184
TCGA-BH-AB28-01	-1.81896
TCGA-B6-A0RE-01	-2.10423
TCGA-D8-A1JP-01	-1.57685
TCGA-S3-A6ZF-01	-1.92531
TCGA-AC-A3YJ-01	-1.56767
TCGA-A2-A0YI-01	-1.94753
TCGA-AN-A04C-01	-1.34368
TCGA-B6-A0RO-01	-1.5611
TCGA-A2-A0SX-01	-2.18203
TCGA-E2-A14R-01	-1.94205
TCGA-A7-A0DB-01	-1.83055
TCGA-EW-A1OX-01	-1.36707
TCGA-A7-A26F-01	-1.41327
TCGA-AC-A2QH-01	-2.22395
TCGA-AO-A1KR-01	-1.89558
TCGA-BH-A1ES-01	-1.82915
TCGA-B6-A0IE-01	-1.23135
TCGA-EW-A1P5-01	-1.59481
TCGA-E9-A5UO-01	-1.00829
TCGA-HN-A2NL-01	-2.70654
TCGA-GM-A2DN-01	-1.82432
TCGA-C8-A12V-01	-1.86643
TCGA-EW-A1J2-01	-2.16969
TCGA-AR-A1AR-01	-2.46449
TCGA-PL-A8LV-01	-1.87448
TCGA-D8-A1JF-01	-0.594293
TCGA-AC-A23E-01	-1.92723
TCGA-BH-A0DH-01	-1.45518
TCGA-C8-A12Y-01	-1.92961
TCGA-BH-A0BG-01	-2.1316
TCGA-BH-A18H-01	-1.80845
TCGA-D8-A1JD-01	-1.75489
TCGA-E9-A228-01	-1.1686
TCGA-E9-A3HO-01	-1.44519
TCGA-A2-A0EV-01	-1.53426
TCGA-BH-A0EI-01	-1.50668
TCGA-AN-A0XW-01	-1.53978
TCGA-A8-A09A-01	-1.46378
TCGA-A1-A0SG-01	-1.59312
TCGA-BH-A1F6-01	-1.83736
TCGA-E9-A249-01	-2.52869
TCGA-BH-A1F2-01	-1.76862
TCGA-A8-A096-01	-2.13996
TCGA-AR-A1AI-01	-1.83514
TCGA-AC-A3BB-01	-2.06825
TCGA-BH-A0WA-01	-2.23985
TCGA-AQ-A1H3-01	-1.94703
TCGA-BH-A0E7-01	-1.67875
TCGA-BH-A0RX-01	-2.15723
TCGA-AO-A03U-01	-1.80045
TCGA-AR-A24L-01	-1.513
TCGA-E2-A1IJ-01	-1.97544
TCGA-E2-A150-01	-1.50012
TCGA-E2-A15H-01	-1.81613
TCGA-BH-A0E0-01	-1.6691
TCGA-A2-A0D1-01	-1.2124
TCGA-A8-A09D-01	-1.28362
TCGA-AQ-A1H2-01	-1.91886
TCGA-D8-A1JH-01	-1.95467
TCGA-GM-A3NW-01	-1.46758
TCGA-A7-A0CD-01	-1.97571
TCGA-A7-A2KD-01	-1.70412
TCGA-AO-A03L-01	-2.05397
TCGA-AR-A2LR-01	-2.79301
TCGA-E2-A14T-01	-0.780658
TCGA-AR-A24U-01	-1.30784
TCGA-BH-A28Q-01	-2.17337
TCGA-C8-A3M7-01	-1.72477
TCGA-BH-A0EE-01	-1.40926
TCGA-3C-AALK-01	-1.71157
TCGA-EW-A1OW-01	-2.27467
TCGA-E2-A108-01	-1.73538
TCGA-A2-A0D4-01	-0.917427
TCGA-E9-A1RA-01	-2.11649
TCGA-V7-A7HQ-01	-1.46614
TCGA-AR-A24X-01	-2.53192
TCGA-D8-A73X-01	-2.12885
TCGA-BH-A0W4-01	-1.81245
TCGA-BH-A1ET-01	-1.98953
TCGA-BH-A0C7-01	-1.8624
TCGA-LD-A7W5-01	-2.02655
TCGA-D8-A1XK-01	-2.54706
TCGA-A2-A0T4-01	-1.71771
TCGA-AN-A0FX-01	-2.0493
TCGA-A2-A0D3-01	-2.38571
TCGA-D8-A1XS-01	-1.75101
TCGA-C8-A138-01	-1.48719
TCGA-AR-A24R-01	-1.59752
TCGA-BH-A2L8-01	-2.10578
TCGA-E2-A14V-01	-1.66361
TCGA-AO-A0JE-01	-1.73257
TCGA-A8-A06O-01	-1.32538
TCGA-AO-A0J4-01	-1.98365
TCGA-EW-A1P3-01	-1.61758
TCGA-B6-A0WT-01	-1.70365
TCGA-C8-A26W-01	-1.92723
TCGA-AN-A041-01	-1.42316
TCGA-D8-A1Y3-01	-1.94655
TCGA-B6-A40B-01	-1.89024
TCGA-B6-A1KI-01	-1.54963
TCGA-A8-A090-01	-1.83523
TCGA-BH-A0B6-01	-1.78818
TCGA-A8-A09W-01	-1.53958
TCGA-AO-A03M-01	-1.74503
TCGA-E2-A1L6-01	-1.99426
TCGA-AR-A0TQ-01	-1.48362
TCGA-B6-A0RP-01	-2.16373
TCGA-AN-A0FK-01	-1.62446
TCGA-E9-A22D-01	-2.05435
TCGA-BH-A18L-01	-0.811532
TCGA-E9-A1RG-01	-1.23711
TCGA-D8-A146-01	-1.649
TCGA-AO-A0JL-01	-1.58766
TCGA-EW-A6SB-01	-1.90429
TCGA-3C-AAAU-01	-1.10954
TCGA-GM-A2DF-01	-1.5875
TCGA-E2-A15J-01	-2.20963
TCGA-EW-A424-01	-2.00636
TCGA-A8-A07Z-01	-1.46472
TCGA-BH-A0BF-01	-1.84422
TCGA-E2-A154-01	-2.03739
TCGA-A8-A08T-01	-1.75369
TCGA-A8-A085-01	-1.14035
TCGA-EW-A1P4-01	-2.50427
TCGA-EW-A1J1-01	-1.43452
TCGA-A8-A084-01	-1.6528
TCGA-E9-A1R7-01	-1.40224
TCGA-AO-A0JA-01	-1.90077
TCGA-A2-A1G4-01	-1.42371
TCGA-C8-A12K-01	-1.75753
TCGA-A2-A0CK-01	-1.91547
TCGA-A7-A4SE-01	-2.5611
TCGA-C8-A274-01	-1.87201
TCGA-BH-A0B0-01	-1.75322
TCGA-BH-A1EY-01	-1.75557
TCGA-C8-A12O-01	-1.44786
TCGA-BH-A42U-01	-2.28813
TCGA-AQ-A04H-01	-1.53846
TCGA-A7-A425-01	-1.61374
TCGA-AN-A049-01	-1.73444
TCGA-A8-A06Y-01	-1.97248
TCGA-AR-A2LE-01	-1.55151
TCGA-AC-A23G-01	-1.94148
TCGA-A7-A5ZV-01	-1.23179
TCGA-BH-A0BL-01	-2.18758
TCGA-EW-A1PA-01	-1.29036
TCGA-E9-A1RC-01	-1.83532
TCGA-A2-A1FV-01	-1.35486
TCGA-BH-A0AU-01	-1.49702
TCGA-LL-A73Y-01	-2.23927
TCGA-D8-A1JC-01	-1.62219
TCGA-E2-A1B4-01	-1.91432
TCGA-A2-A0EW-01	-1.78114
TCGA-E9-A1NG-01	-1.91809
TCGA-AR-A1AL-01	-2.0857
TCGA-LD-A7W6-01	-2.2419
TCGA-JL-A3YW-01	-1.53047
TCGA-A2-A1FX-01	-1.25474
TCGA-BH-A1FJ-01	-1.95031
TCGA-A2-A0EX-01	-1.66193
TCGA-A2-A0CM-01	-2.39037
TCGA-GM-A2DA-01	-1.43787
TCGA-B6-A0X7-01	-1.8346
TCGA-AR-A2LQ-01	-1.68265
TCGA-W8-A86G-01	-1.90573
TCGA-BH-A0HO-01	-1.71052
TCGA-BH-A1FU-01	-1.86719
TCGA-A8-A091-01	-0.734872
TCGA-E9-A1N3-01	-0.938211
TCGA-AR-A0U2-01	-1.63762
TCGA-BH-A0W7-01	-1.9142
TCGA-E9-A1R5-01	-1.80543
TCGA-3C-AALI-01	-1.37197
TCGA-E9-A1RI-01	-2.08214
TCGA-A2-A0ER-01	-1.1121
TCGA-3C-AALJ-01	-1.48181
TCGA-E9-A6HE-01	-2.12688
TCGA-A7-A5ZX-01	-2.2601
TCGA-BH-A201-01	-2.04457
TCGA-A2-A04W-01	-1.13621
TCGA-D8-A73W-01	-1.55193
TCGA-A7-A3IY-01	-1.82838
TCGA-OL-A6VR-01	-1.7285
TCGA-EW-A2FR-01	-1.82999
TCGA-BH-A0HP-01	-1.85222
TCGA-AR-A0TP-01	-1.67943
TCGA-C8-A12X-01	-1.39418
TCGA-D8-A1XJ-01	-1.74968
TCGA-AR-A0TZ-01	-1.7699
TCGA-EW-A1OY-01	-1.35762
TCGA-GM-A2DC-01	-0.739751
TCGA-BH-A18N-01	-1.75945
TCGA-E9-A1ND-01	-2.08006
TCGA-D8-A1XR-01	-1.90152
TCGA-A2-A0ES-01	-1.91328
TCGA-C8-A1HO-01	-1.50122
TCGA-LL-A9Q3-01	-1.12971
TCGA-A7-A3J1-01	-1.83743
TCGA-AC-A5EH-01	-1.69117
TCGA-E2-A15O-01	-2.31261
TCGA-AC-A3W6-01	-1.93283
TCGA-AN-A0FD-01	-1.66084
TCGA-BH-A0BM-01	-1.68474
TCGA-E9-A22H-01	-2.26199
TCGA-EW-A1IY-01	-2.41578
TCGA-E9-A3X8-01	-1.68335
TCGA-AR-A24K-01	-1.95757
TCGA-S3-AA11-01	-2.10579
TCGA-EW-A6SA-01	-1.89583
TCGA-A2-A0CP-01	-1.85125
TCGA-B6-A0RU-01	-2.04955
TCGA-B6-A0RS-01	-1.74592
TCGA-A1-A0SN-01	-1.86863
TCGA-EW-A1IZ-01	-1.50565
TCGA-A7-A13F-01	-1.08984
TCGA-D8-A1JT-01	-1.66993
TCGA-D8-A1JM-01	-2.53613
TCGA-BH-A0BQ-01	-2.08433
TCGA-BH-A0EA-01	-1.94736
TCGA-BH-A0BA-01	-1.61511
TCGA-EW-A6SC-01	-2.00764
TCGA-OL-A5DA-01	-2.05862
TCGA-A2-A0T1-01	-1.37366
TCGA-AO-A0JC-01	-2.27223
TCGA-EW-A2FS-01	-1.59747
TCGA-A8-A09K-01	-1.16382
TCGA-E2-A107-01	-1.76415
TCGA-A7-A6VY-01	-2.28971
TCGA-E2-A14Q-01	-1.74141
TCGA-E2-A15A-06	-1.79087
TCGA-B6-A0IB-01	-1.28244
TCGA-A8-A06Q-01	-1.43677
TCGA-GM-A2DK-01	-1.18437
TCGA-5L-AAT0-01	-1.97978
TCGA-A7-A4SC-01	-1.81744
TCGA-A2-A0CR-01	-1.90036
TCGA-AC-A2QJ-01	-1.38836
TCGA-AN-A03X-01	-1.63157
TCGA-AN-A0FL-01	-1.13151
TCGA-BH-A18P-01	-2.20858
TCGA-AC-A3YI-01	-2.0686
TCGA-A2-A0SY-01	-1.81859
TCGA-GM-A2DM-01	-1.59755
TCGA-D8-A1XF-01	-1.35084
TCGA-BH-A1FM-01	-1.56777
TCGA-BH-A0HN-01	-1.58667
TCGA-AN-A0FV-01	-1.18405
TCGA-B6-A0X0-01	-2.29632
TCGA-AO-A03T-01	-0.357016
TCGA-S3-AA15-01	-1.98036
TCGA-AO-A12D-01	-1.24654
TCGA-BH-A0DK-01	-1.63557
TCGA-AO-A124-01	-2.52053
TCGA-E2-A15R-01	-1.14108
TCGA-D8-A1Y1-01	-1.8433
TCGA-A2-A04T-01	-1.782
TCGA-UU-A93S-01	-1.32766
TCGA-A2-A0T6-01	-2.02817
TCGA-E2-A10F-01	-2.1495
TCGA-EW-A1IW-01	-2.00294
TCGA-E9-A1NC-01	-2.08509
TCGA-AC-A3TM-01	-2.00665
TCGA-E9-A1QZ-01	-1.70575
TCGA-A8-A09C-01	-1.72558
TCGA-D8-A73U-01	-1.77114
TCGA-A8-A07E-01	-2.04194
TCGA-AC-A3TN-01	-1.70039
TCGA-AO-A0JF-01	-1.88008
TCGA-E2-A153-01	-1.61087
TCGA-BH-A0B5-01	-2.02594
TCGA-A8-A07W-01	-1.2177
TCGA-BH-A0B8-01	-1.37174
TCGA-BH-A0B1-01	-1.36121
TCGA-BH-A1FN-01	-1.76236
TCGA-D8-A147-01	-2.37618
TCGA-PL-A8LX-01	-1.43636
TCGA-E9-A1N4-01	-1.80955
TCGA-BH-A18F-01	-2.01376
TCGA-D8-A27F-01	-1.72941
TCGA-A8-A0AB-01	-1.83498
TCGA-AR-A0TS-01	-2.10506
TCGA-BH-A0H9-01	-1.60917
TCGA-A8-A07U-01	-1.5964
TCGA-E2-A14X-01	-1.7425
TCGA-C8-A131-01	-1.54576
TCGA-BH-A1FL-01	-2.5197
TCGA-C8-A12W-01	-1.32156
TCGA-AC-A7VC-01	-2.41005
TCGA-AO-A12E-01	-1.61667
TCGA-E2-A1LI-01	-2.15094
TCGA-AC-A2BM-01	-1.64592
TCGA-A8-A07R-01	-2.34926
TCGA-BH-A0AW-01	-1.17652
TCGA-A7-A426-01	-2.03259
TCGA-BH-A6R8-01	-1.58008
TCGA-AC-A8OS-01	-1.52518
TCGA-A2-A04Q-01	-2.14432
TCGA-A7-A26H-01	-1.73492
TCGA-A7-A4SF-01	-1.22431
TCGA-D8-A27M-01	-1.63705
TCGA-E9-A1NE-01	-1.88847
TCGA-E2-A573-01	-2.60065
TCGA-C8-A1HI-01	-1.79502
TCGA-A7-A6VW-01	-2.44392
TCGA-BH-A0B7-01	-1.34394
TCGA-A8-A0A6-01	-1.85798
TCGA-AO-A0J5-01	-1.48717
TCGA-AO-A12H-01	-1.43335
TCGA-E2-A15G-01	-1.96984
TCGA-GM-A5PV-01	-1.78303
TCGA-E9-A24A-01	-2.06756
TCGA-AR-A2LM-01	-2.17635
TCGA-E2-A1II-01	-2.66297
TCGA-D8-A27P-01	-1.95379
TCGA-EW-A1J3-01	-1.58077
TCGA-B6-A0I8-01	-0.78854
TCGA-AO-A1KS-01	-2.02827
TCGA-A2-A4S2-01	-1.89775
TCGA-BH-A6R9-01	-2.44295
TCGA-BH-A8FZ-01	-1.95962
TCGA-AC-A2FK-01	-2.06248
TCGA-A2-A0T0-01	-1.93688
TCGA-A8-A07S-01	-1.76934
TCGA-GM-A2DI-01	-1.93601
TCGA-E2-A106-01	-1.28999
TCGA-BH-A0E6-01	-1.65176
TCGA-AO-A03V-01	-1.65502
TCGA-AC-A2BK-01	-2.69045
TCGA-AR-A254-01	-1.70302
TCGA-AO-A129-01	-2.00702
TCGA-BH-A8FY-01	-1.60797
TCGA-D8-A143-01	-2.36058
TCGA-AC-A3W7-01	-2.00553
TCGA-A8-A06X-01	-2.04072
TCGA-AR-A255-01	-2.11382
TCGA-BH-A0DZ-01	-1.63046
TCGA-C8-A12T-01	-1.67667
TCGA-AO-A12G-01	-0.860907
TCGA-E2-A15L-01	-1.941
TCGA-AN-A0FF-01	-1.78983
TCGA-A2-A3XX-01	-1.78698
TCGA-EW-A1P8-01	-2.43247
TCGA-A8-A097-01	-1.35825
TCGA-BH-A0E1-01	-1.8893
TCGA-BH-A0HF-01	-1.5846
TCGA-E9-A5FL-01	-1.97065
TCGA-AR-A1AW-01	-2.04888
TCGA-AQ-A0Y5-01	-1.49485
TCGA-OK-A5Q2-01	-2.04479
TCGA-E2-A1B6-01	-2.53044
TCGA-A8-A07P-01	-1.47567
TCGA-AR-A0TW-01	-1.61333
TCGA-E9-A1N6-01	-1.85024
TCGA-BH-A1EU-01	-2.02383
TCGA-A2-A0EQ-01	-1.39514
TCGA-A8-A08C-01	-2.31924
TCGA-OL-A5RW-01	-1.94435
TCGA-B6-A0WS-01	-1.87326
TCGA-BH-A42V-01	-1.99444
TCGA-A2-A0YL-01	-2.20429
TCGA-B6-A402-01	-1.74437
TCGA-A7-A0CJ-01	-1.7807
TCGA-E9-A22E-01	-1.60763
TCGA-A2-A3Y0-01	-2.11122
TCGA-AN-A0FZ-01	-1.40008
TCGA-BH-A0DQ-01	-1.76396
TCGA-A8-A07J-01	-1.60087
TCGA-E9-A54X-01	-1.18789
TCGA-B6-A1KC-01	-0.830959
TCGA-BH-A18K-01	-1.88183
TCGA-A2-A0EU-01	-1.63789
TCGA-B6-A0IH-01	-1.79683
TCGA-A2-A0EY-01	-1.21218
TCGA-AO-A0JJ-01	-1.72034
TCGA-C8-A26X-01	-1.55583
TCGA-BH-A18Q-01	-1.94717
TCGA-A8-A092-01	-1.93953
TCGA-S3-AA12-01	-1.29924
TCGA-BH-A1EO-01	-1.66535
TCGA-A2-A4RW-01	-1.56398
TCGA-D8-A142-01	-1.61007
TCGA-A2-A0YE-01	-1.64082
TCGA-A2-A04P-01	-1.47668
TCGA-A2-A0CY-01	-1.73214
TCGA-E9-A1RB-01	-2.01592
TCGA-A7-A5ZW-01	-2.32136
TCGA-E2-A1IN-01	-1.84431
TCGA-EW-A6S9-01	-1.69796
TCGA-AR-A5QM-01	-1.82626
TCGA-AO-A0J7-01	-1.85605
TCGA-A2-A3KC-01	-1.95326
TCGA-E2-A15D-01	-1.9224
TCGA-A2-A0YG-01	-1.72836
TCGA-AO-A03O-01	-2.06807
TCGA-OL-A66N-01	-1.55848
TCGA-B6-A0I2-01	-1.77064
TCGA-E2-A572-01	-1.19957
TCGA-EW-A1PG-01	-2.3738
TCGA-A7-A26G-01	-1.82496
TCGA-B6-A0WV-01	-1.62843
TCGA-AO-A0JM-01	-1.81423
TCGA-D8-A1X7-01	-1.41773
TCGA-C8-A3M8-01	-1.30227
TCGA-LL-A5YN-01	-2.0681
TCGA-B6-A0RG-01	-1.7282
TCGA-AC-A3OD-01	-1.48819
TCGA-A8-A08O-01	-1.97705
TCGA-A8-A07B-01	-1.32576
TCGA-A8-A08L-01	-1.38352
TCGA-E2-A15I-01	-1.90699
TCGA-BH-A0HQ-01	-1.52042
TCGA-AR-A24V-01	-1.82478
TCGA-EW-A1P1-01	-1.99331
TCGA-EW-A3E8-01	-1.66653
TCGA-A8-A07O-01	-1.74168
TCGA-AN-A04D-01	-2.09326
TCGA-E9-A2JT-01	-2.05343
TCGA-A2-A4S3-01	-1.39003
TCGA-AN-A0AK-01	-1.64223
TCGA-AO-A1KO-01	-1.97914
TCGA-BH-A1ES-06	-0.334047
TCGA-AR-A1AV-01	-1.79243
TCGA-A2-A0D0-01	-2.71437
TCGA-A7-A13G-01	-1.58616
TCGA-AC-A2QI-01	-1.74559
TCGA-AC-A2FM-01	-1.77912
TCGA-B6-A0X5-01	-1.27483
TCGA-C8-A12L-01	-1.64922
TCGA-AN-A0AS-01	-1.62057
TCGA-A8-A0A2-01	-1.74108
TCGA-LQ-A4E4-01	-1.6745
TCGA-A1-A0SI-01	-1.78985
TCGA-BH-A5J0-01	-1.87159
TCGA-D8-A1Y2-01	-1.67754
TCGA-A7-A3RF-01	-0.584097
TCGA-A2-A0T5-01	-2.16847
TCGA-BH-A1F5-01	-1.75797
TCGA-LD-A66U-01	-2.41925
TCGA-E9-A3QA-01	-1.92967
TCGA-AO-A12F-01	-2.0272
TCGA-A2-A25E-01	-1.66741
TCGA-A8-A0A4-01	-1.74672
TCGA-EW-A1J6-01	-1.37656
TCGA-C8-A8HR-01	-1.83167
TCGA-BH-A0BV-01	-2.01246
TCGA-D8-A27T-01	-2.16725
TCGA-E9-A1RE-01	-1.53355
TCGA-A2-A0T3-01	-1.73947
TCGA-E2-A15E-01	-1.73554
TCGA-E9-A1N5-01	-1.47833
TCGA-B6-A0RV-01	-1.94551
TCGA-E2-A15P-01	-1.88465
TCGA-AC-A3EH-01	-1.66274
TCGA-BH-A1FB-01	-2.11575
TCGA-A8-A07C-01	-2.54492
TCGA-E9-A5FK-01	-1.71283
TCGA-A2-A0CO-01	-1.90567
TCGA-A8-A0A9-01	-2.03772
TCGA-C8-A1HF-01	-2.07411
TCGA-AQ-A54O-01	-1.14628
TCGA-S3-AA17-01	-1.39298
TCGA-MS-A51U-01	-1.62537
TCGA-AC-A62V-01	-1.34945
TCGA-GI-A2C8-01	-1.21267
TCGA-BH-A18S-01	-1.52951
TCGA-EW-A1P7-01	-2.33081
TCGA-A8-A08P-01	-1.91556
TCGA-A8-A095-01	-1.94519
TCGA-EW-A1P0-01	-1.56579
TCGA-A2-A4S1-01	-0.923722
TCGA-AR-A0U3-01	-1.33196
TCGA-BH-A0EB-01	-1.80913
TCGA-E9-A54Y-01	-1.34799
TCGA-D8-A1XU-01	-1.56488
TCGA-OL-A66J-01	-1.85883
TCGA-EW-A1PD-01	-1.22932
TCGA-BH-A0BC-01	-1.57148
TCGA-AC-A23H-01	-1.57735
TCGA-D8-A1XC-01	-1.15253
TCGA-AN-A0XV-01	-1.74531
TCGA-A8-A08G-01	-1.6523
TCGA-A2-A1FW-01	-1.59142
TCGA-LL-A5YO-01	-1.97455
TCGA-E9-A1RF-01	-1.6628
TCGA-XX-A899-01	-1.86051
TCGA-E2-A15K-06	-1.27696
TCGA-AO-A0JI-01	-1.8281
TCGA-AN-A0AM-01	-1.71228
TCGA-AO-A128-01	-2.20527
TCGA-C8-A12N-01	-2.01881
TCGA-A7-A6VX-01	-1.58423
TCGA-C8-A133-01	-1.28586
TCGA-A2-A0CS-01	-1.94457
TCGA-E2-A15K-01	-1.71971
TCGA-A8-A083-01	-2.04364
TCGA-XX-A89A-01	-1.69952
TCGA-BH-A28O-01	-2.01454
TCGA-B6-A0IC-01	-1.82195
TCGA-B6-A401-01	-1.62273
TCGA-AN-A0XS-01	-1.68358
TCGA-A7-A0CG-01	-1.91703
TCGA-A1-A0SM-01	-1.2841
TCGA-D8-A27R-01	-1.54935
TCGA-GM-A2DD-01	-1.44387
TCGA-LL-A740-01	-1.4268
TCGA-AR-A24T-01	-1.97766
TCGA-BH-A0H0-01	-0.976549
TCGA-A8-A09T-01	-1.89513
TCGA-B6-A0WW-01	-2.0835
TCGA-OL-A66L-01	-1.81856
TCGA-A8-A0A7-01	-1.35899
TCGA-A7-A4SA-01	-1.56438
TCGA-A2-A0EN-01	-1.78551
TCGA-B6-A0IO-01	-1.49268
TCGA-AC-A8OQ-01	-1.90528
TCGA-D8-A27E-01	-1.21871
TCGA-BH-A8G0-01	-1.95694
TCGA-A2-A3XW-01	-1.67424
TCGA-BH-A0DP-01	-1.67291
TCGA-PE-A5DD-01	-1.77069
TCGA-OL-A66K-01	-1.83509
TCGA-BH-A1FG-01	-1.33795
TCGA-A2-A25D-01	-1.67281
TCGA-S3-AA14-01	-1.35745
TCGA-LL-A440-01	-1.64452
TCGA-A2-A0SW-01	-0.804764
TCGA-D8-A1XW-01	-1.40769
TCGA-B6-A2IU-01	-1.85234
TCGA-GM-A2DO-01	-1.81737
TCGA-B6-A0IA-01	-1.66883
TCGA-C8-A26Y-01	-1.03922
TCGA-AN-A0G0-01	-1.82991
TCGA-AO-A0JG-01	-1.83992
TCGA-E2-A1LH-01	-1.50957
TCGA-AN-A0FY-01	-1.37055
TCGA-E2-A1L9-01	-2.21932
TCGA-BH-A0W5-01	-1.96277
TCGA-AQ-A54N-01	-2.01279
TCGA-GM-A3NY-01	-1.75211
TCGA-A8-A09E-01	-1.76824
TCGA-AR-A0TX-01	-1.30561
TCGA-AQ-A04J-01	-1.83205
TCGA-AR-A2LJ-01	-1.56582
TCGA-OL-A66H-01	-1.76191
TCGA-AC-A23C-01	-1.43936
TCGA-D8-A1XQ-01	-2.2636
TCGA-E2-A156-01	-1.87321
TCGA-AC-A6IV-01	-1.67892
TCGA-E2-A15E-06	-1.80597
TCGA-D8-A1X6-01	-1.85231
TCGA-A8-A0AD-01	-1.45805
TCGA-A8-A07G-01	-1.63108
TCGA-C8-A130-01	-1.71939
TCGA-AN-A046-01	-1.9069
TCGA-E2-A1AZ-01	-2.49104
TCGA-B6-A400-01	-2.28843
TCGA-Z7-A8R5-01	-2.05897
TCGA-E2-A155-01	-1.00385
TCGA-E2-A109-01	-1.61387
TCGA-BH-A1EN-01	-1.14668
TCGA-AR-A1AQ-01	-1.68498
TCGA-E2-A574-01	-2.55244
TCGA-A2-A1G0-01	-1.52296
TCGA-AC-A4ZE-01	-1.38718
TCGA-AR-A24O-01	-1.90264
TCGA-BH-A0AV-01	-2.31752
TCGA-C8-A137-01	-1.59211
TCGA-B6-A0RL-01	-1.93715
TCGA-OL-A5RV-01	-1.98707
TCGA-B6-A0IM-01	-1.44386
TCGA-B6-A0IK-01	-1.56033
TCGA-B6-A0WX-01	-2.43584
TCGA-AR-A24H-01	-2.08716
TCGA-B6-A0IQ-01	-2.25744
TCGA-D8-A27N-01	-1.33839
TCGA-C8-A275-01	-1.37825
TCGA-B6-A0IG-01	-1.45812
TCGA-E9-A243-01	-2.34442
TCGA-D8-A1JE-01	-1.84898
TCGA-E2-A1LE-01	-1.87148
TCGA-AC-A6IX-01	-1.94497
TCGA-A8-A09Q-01	-1.53338
TCGA-AN-A0AL-01	-1.73937
TCGA-A2-A4RY-01	-2.11886
TCGA-AR-A5QQ-01	-2.74868
TCGA-D8-A140-01	-1.76041
TCGA-A2-A0YH-01	-1.66213
TCGA-B6-A3ZX-01	-2.18962
TCGA-A1-A0SE-01	-1.7942
TCGA-AR-A1AN-01	-1.689
TCGA-A8-A08R-01	-1.58992
TCGA-OL-A5RX-01	-2.21339
TCGA-AR-A2LO-01	-2.07856
TCGA-BH-A0BD-01	-1.73535
TCGA-AR-A24N-01	-2.0115
TCGA-AR-A2LH-01	-1.67776
TCGA-AR-A1AO-01	-1.83654
TCGA-BH-A1EW-01	-1.75762
TCGA-BH-A0W3-01	-1.80488
TCGA-EW-A1PF-01	-1.5336
TCGA-S3-A6ZG-01	-1.87816
TCGA-E9-A22A-01	-1.79028
TCGA-A2-A0YT-01	-1.3896
TCGA-B6-A0IN-01	-0.955944
TCGA-C8-A1HJ-01	-2.33314
TCGA-AQ-A7U7-01	-2.14017
TCGA-D8-A1JI-01	-1.42901
TCGA-GM-A2D9-01	-1.89913
TCGA-A8-A06R-01	-1.52936
TCGA-AR-A1AT-01	-2.04299
TCGA-AO-A1KP-01	-2.39317
TCGA-AN-A0AJ-01	-2.31761
TCGA-A8-A07F-01	-2.11818
TCGA-GM-A3XG-01	-2.02663
TCGA-AR-A0TV-01	-1.62056
TCGA-A2-A3XY-01	-2.32433
TCGA-BH-A0DD-01	-1.94564
TCGA-A2-A1FZ-01	-1.78419
TCGA-D8-A13Z-01	-2.38585
TCGA-A2-A25C-01	-2.22743
TCGA-AN-A0XR-01	-2.18298
TCGA-B6-A0RN-01	-2.25376
TCGA-AC-A2FB-01	-1.68008
TCGA-AC-A7VB-01	-1.5446
TCGA-A2-A0YM-01	-2.7906
TCGA-OL-A5D8-01	-1.92886
TCGA-D8-A1XL-01	-2.23677
TCGA-AR-A252-01	-1.63564
TCGA-BH-A18G-01	-2.05309
TCGA-OL-A5D6-01	-1.16624
TCGA-A8-A086-01	-1.56925

## Sheet: lapatinib
TCGA-D8-A1XO-01	4.1991
TCGA-AN-A0FN-01	4.38384
TCGA-AC-A62X-01	4.12953
TCGA-E2-A14U-01	4.10713
TCGA-E9-A1R3-01	4.32917
TCGA-BH-A18M-01	4.22292
TCGA-E2-A15T-01	4.77351
TCGA-AR-A0TU-01	5.08973
TCGA-EW-A1IX-01	4.23618
TCGA-B6-A408-01	4.6929
TCGA-E2-A1IE-01	4.31936
TCGA-E2-A10E-01	4.11671
TCGA-EW-A3U0-01	5.10377
TCGA-BH-A0H5-01	4.56203
TCGA-E2-A14W-01	4.15131
TCGA-AQ-A04L-01	3.68476
TCGA-BH-A1FD-01	4.9242
TCGA-AR-A0TR-01	4.65121
TCGA-A7-A0CE-01	4.71627
TCGA-AO-A0J8-01	4.18101
TCGA-BH-A1F0-01	4.80077
TCGA-A2-A0SU-01	4.27185
TCGA-AC-A2FF-01	4.49678
TCGA-LL-A6FP-01	3.77927
TCGA-E2-A15S-01	5.23491
TCGA-E2-A14N-01	4.5977
TCGA-D8-A1JK-01	4.29475
TCGA-D8-A3Z6-01	3.9085
TCGA-A8-A06U-01	4.00325
TCGA-A7-A13E-01	4.71494
TCGA-UL-AAZ6-01	4.38243
TCGA-B6-A0I9-01	4.46588
TCGA-A8-A099-01	3.97058
TCGA-OL-A5RY-01	3.9334
TCGA-E9-A1NA-01	4.16685
TCGA-D8-A1XV-01	4.48708
TCGA-BH-A18T-01	4.91052
TCGA-B6-A0RT-01	5.03213
TCGA-A1-A0SJ-01	3.96748
TCGA-E9-A247-01	4.29769
TCGA-C8-A12P-01	4.07607
TCGA-A8-A09X-01	4.26669
TCGA-BH-A1FC-01	5.47505
TCGA-A8-A082-01	4.83213
TCGA-C8-A12M-01	4.86953
TCGA-BH-A1EV-01	4.21776
TCGA-C8-A135-01	3.58206
TCGA-WT-AB44-01	3.94713
TCGA-A7-A3J0-01	4.80675
TCGA-E9-A1R0-01	4.10221
TCGA-B6-A0IJ-01	4.93251
TCGA-LL-A441-01	4.92369
TCGA-A2-A3XT-01	5.36599
TCGA-D8-A27I-01	4.38126
TCGA-A8-A094-01	4.09784
TCGA-A2-A1G6-01	4.16374
TCGA-BH-A0GY-01	4.16706
TCGA-E2-A1B0-01	4.35193
TCGA-E9-A1RH-01	4.04518
TCGA-C8-A1HG-01	4.7303
TCGA-A1-A0SB-01	4.31835
TCGA-A7-A0DC-01	4.85194
TCGA-A7-A3IZ-01	4.85791
TCGA-LL-A5YL-01	3.39885
TCGA-BH-A0DI-01	3.994
TCGA-E2-A1B1-01	4.11956
TCGA-BH-A0H3-01	4.40767
TCGA-D8-A27K-01	4.3681
TCGA-A2-A04U-01	4.34007
TCGA-AO-A0J6-01	4.38409
TCGA-BH-A0E2-01	4.21931
TCGA-E2-A1L8-01	4.27818
TCGA-OL-A5RZ-01	4.39924
TCGA-B6-A1KF-01	4.35436
TCGA-E2-A1L7-01	5.01728
TCGA-B6-A0I6-01	5.06241
TCGA-AN-A0XL-01	4.16379
TCGA-A8-A08B-01	4.33472
TCGA-AC-A6IX-06	4.22317
TCGA-E2-A2P6-01	4.30119
TCGA-E2-A3DX-01	4.56635
TCGA-E2-A159-01	4.58319
TCGA-E9-A1NH-01	4.24692
TCGA-A8-A0A1-01	4.62398
TCGA-D8-A4Z1-01	4.35122
TCGA-AR-A1AS-01	4.53761
TCGA-AR-A24P-01	4.31142
TCGA-A8-A09Z-01	4.0537
TCGA-BH-A0HL-01	5.00052
TCGA-A8-A08X-01	4.48048
TCGA-A8-A09V-01	4.62916
TCGA-D8-A1XT-01	4.29436
TCGA-GM-A4E0-01	4.47703
TCGA-AN-A0XN-01	4.49814
TCGA-A2-A04V-01	4.55366
TCGA-A7-A26I-01	5.20086
TCGA-A2-A3XS-01	4.64884
TCGA-BH-A0BP-01	4.19382
TCGA-AC-A3QQ-01	4.85264
TCGA-AO-A12C-01	4.34868
TCGA-E2-A1IH-01	4.50394
TCGA-BH-A0DS-01	3.95755
TCGA-AN-A0FS-01	3.95061
TCGA-E2-A15F-01	4.52668
TCGA-BH-A0H7-01	3.71684
TCGA-A8-A079-01	4.32507
TCGA-D8-A1XY-01	3.8081
TCGA-AO-A0JD-01	4.27016
TCGA-B6-A0WZ-01	4.03616
TCGA-D8-A1XB-01	4.32039
TCGA-BH-A0BS-01	3.66648
TCGA-BH-A1EX-01	4.11652
TCGA-D8-A1X8-01	4.33139
TCGA-HN-A2OB-01	4.24033
TCGA-B6-A0I1-01	4.54115
TCGA-OL-A97C-01	4.82441
TCGA-E2-A1LK-01	4.04209
TCGA-D8-A1J8-01	4.91699
TCGA-A8-A06P-01	4.33284
TCGA-D8-A3Z5-01	4.28167
TCGA-E2-A152-01	4.0873
TCGA-BH-A0DT-01	4.12081
TCGA-A1-A0SQ-01	4.4019
TCGA-BH-A1FE-01	4.4182
TCGA-BH-A0BR-01	4.2667
TCGA-BH-A18V-01	4.88354
TCGA-GM-A3XN-01	4.52222
TCGA-A8-A09B-01	4.33763
TCGA-PL-A8LY-01	4.02453
TCGA-E2-A10A-01	4.76879
TCGA-A7-A6VV-01	4.69817
TCGA-BH-A0BW-01	4.47648
TCGA-AN-A04A-01	4.17672
TCGA-OL-A66P-01	4.00512
TCGA-A2-A0SV-01	4.36626
TCGA-E2-A1LG-01	4.55282
TCGA-E2-A1LL-01	3.59488
TCGA-A2-A0ET-01	4.92726
TCGA-B6-A0RI-01	4.34095
TCGA-BH-A0GZ-01	3.75895
TCGA-A2-A25A-01	4.52035
TCGA-A8-A06N-01	4.59471
TCGA-EW-A1J5-01	4.66276
TCGA-D8-A27V-01	4.025
TCGA-A2-A0ST-01	4.76863
TCGA-A2-A0CT-01	3.74926
TCGA-AR-A0TT-01	5.03237
TCGA-LL-A8F5-01	4.34293
TCGA-AN-A0FW-01	4.37406
TCGA-BH-A18U-01	4.61156
TCGA-E9-A248-01	4.72413
TCGA-A2-A0CU-01	4.23748
TCGA-BH-A0HY-01	3.75799
TCGA-D8-A1XG-01	4.65309
TCGA-BH-A204-01	5.09581
TCGA-AR-A0U4-01	5.22592
TCGA-E2-A14S-01	4.59587
TCGA-D8-A1JS-01	3.74076
TCGA-C8-A1HK-01	4.13232
TCGA-AR-A250-01	4.42478
TCGA-EW-A1PB-01	4.51932
TCGA-AC-A2B8-01	4.48237
TCGA-A8-A08I-01	5.25813
TCGA-BH-A18V-06	4.84573
TCGA-LL-A6FQ-01	3.91855
TCGA-A1-A0SP-01	4.9066
TCGA-LL-A442-01	4.76541
TCGA-A2-A3XU-01	4.2964
TCGA-A2-A25B-01	4.40761
TCGA-AO-A1KT-01	4.48957
TCGA-B6-A1KN-01	4.32056
TCGA-LL-A5YP-01	4.69116
TCGA-AR-A1AU-01	4.43771
TCGA-A7-A26J-01	4.64323
TCGA-E9-A245-01	4.71273
TCGA-BH-A42T-01	4.60501
TCGA-A2-A0EM-01	4.22051
TCGA-PE-A5DC-01	4.21214
TCGA-A7-A13D-01	4.65591
TCGA-BH-A0HK-01	3.70904
TCGA-B6-A0IP-01	4.16019
TCGA-D8-A1XA-01	4.18806
TCGA-D8-A1X5-01	4.35074
TCGA-D8-A27L-01	4.46362
TCGA-D8-A1JJ-01	4.65125
TCGA-A2-A1G1-01	4.75147
TCGA-E2-A1IL-01	4.30502
TCGA-A7-A4SB-01	4.33463
TCGA-A7-A13H-01	4.6512
TCGA-BH-A0AY-01	4.05442
TCGA-A8-A075-01	4.46707
TCGA-E2-A158-01	4.83815
TCGA-BH-A0B4-01	3.98523
TCGA-BH-A0DV-01	3.94347
TCGA-A2-A0EP-01	5.0278
TCGA-EW-A1PE-01	4.24591
TCGA-LL-A73Z-01	3.93355
TCGA-AR-A1AJ-01	5.20235
TCGA-E9-A227-01	4.16796
TCGA-AO-A0JB-01	3.95965
TCGA-A8-A09N-01	4.09987
TCGA-E2-A15A-01	4.3581
TCGA-A8-A08A-01	4.20186
TCGA-AC-A5XS-01	4.27606
TCGA-BH-A209-01	4.82841
TCGA-AR-A24S-01	4.58975
TCGA-A7-A26E-01	4.58385
TCGA-EW-A1P6-01	4.20086
TCGA-C8-A1HM-01	4.79865
TCGA-OL-A6VQ-01	4.34474
TCGA-E2-A1B5-01	4.44466
TCGA-A2-A0CV-01	4.10546
TCGA-5L-AAT1-01	4.27508
TCGA-B6-A0X4-01	4.83817
TCGA-E2-A105-01	5.17487
TCGA-AC-A3HN-01	4.44238
TCGA-A1-A0SO-01	5.12544
TCGA-E2-A10B-01	4.57021
TCGA-A1-A0SH-01	3.56654
TCGA-E9-A2JS-01	4.72619
TCGA-A2-A04R-01	4.19753
TCGA-C8-A12Q-01	4.06492
TCGA-AN-A0FT-01	3.74985
TCGA-4H-AAAK-01	4.35093
TCGA-E2-A15M-01	4.74608
TCGA-A8-A08H-01	4.81468
TCGA-C8-A273-01	3.648
TCGA-BH-A0DE-01	4.32512
TCGA-C8-A12U-01	4.72899
TCGA-A2-A0EO-01	3.78836
TCGA-AC-A6IW-01	5.27279
TCGA-LL-A50Y-01	4.06748
TCGA-A7-A0DA-01	4.61963
TCGA-GM-A2DL-01	4.28
TCGA-E9-A244-01	4.32643
TCGA-E2-A15C-01	4.28167
TCGA-BH-A0BT-01	3.64102
TCGA-BH-A0E9-01	4.30495
TCGA-BH-A18I-01	4.5017
TCGA-BH-A0HI-01	3.9495
TCGA-A2-A0CZ-01	4.06678
TCGA-D8-A1X9-01	4.40135
TCGA-BH-A18R-01	4.40601
TCGA-AO-A12B-01	4.10335
TCGA-BH-A0B3-01	4.61089
TCGA-C8-A8HP-01	4.51782
TCGA-AR-A1AM-01	4.21825
TCGA-A2-A4S0-01	4.8827
TCGA-AO-A126-01	3.99964
TCGA-AR-A5QN-01	4.3878
TCGA-A8-A08F-01	4.8608
TCGA-PE-A5DE-01	4.56354
TCGA-A8-A076-01	4.15375
TCGA-A2-A3XZ-01	4.71493
TCGA-AR-A256-01	4.96839
TCGA-BH-A0DG-01	3.99236
TCGA-C8-A26Z-01	4.34113
TCGA-BH-A0HW-01	4.48697
TCGA-A1-A0SD-01	4.1632
TCGA-A2-A0CX-01	4.03
TCGA-AO-A03R-01	4.27706
TCGA-PL-A8LZ-01	4.65547
TCGA-BH-A1F8-01	4.12535
TCGA-BH-A0BZ-01	4.32732
TCGA-AC-A8OP-01	4.31231
TCGA-GI-A2C9-01	4.04083
TCGA-AO-A125-01	4.13541
TCGA-EW-A1OZ-01	4.11341
TCGA-BH-A0C0-01	4.22677
TCGA-AN-A03Y-01	4.50505
TCGA-D8-A145-01	4.58776
TCGA-OL-A66I-01	4.85762
TCGA-OL-A5S0-01	4.50128
TCGA-B6-A0I5-01	4.00773
TCGA-Z7-A8R6-01	4.71225
TCGA-LD-A9QF-01	4.38139
TCGA-C8-A134-01	4.94841
TCGA-AN-A0XT-01	4.60431
TCGA-BH-A0HA-01	3.88298
TCGA-AR-A251-01	4.9083
TCGA-C8-A26V-01	3.67695
TCGA-OL-A5D7-01	5.39348
TCGA-E2-A1IU-01	4.12385
TCGA-AN-A0XO-01	3.96463
TCGA-AN-A0AR-01	4.48008
TCGA-E2-A1IO-01	4.3264
TCGA-D8-A27H-01	4.02039
TCGA-A7-A56D-01	3.79944
TCGA-GM-A3XL-01	4.80604
TCGA-BH-A0DX-01	4.35935
TCGA-A2-A4RX-01	4.94314
TCGA-B6-A0X1-01	4.87365
TCGA-S3-AA0Z-01	5.25627
TCGA-BH-A1FH-01	4.23096
TCGA-AR-A24W-01	4.14461
TCGA-A8-A06T-01	4.35207
TCGA-B6-A0RM-01	4.46158
TCGA-A2-A04N-01	4.11375
TCGA-E9-A226-01	4.1894
TCGA-BH-A0BJ-01	4.09017
TCGA-E2-A10C-01	4.232
TCGA-BH-A5IZ-01	4.6198
TCGA-E9-A1RD-01	4.19699
TCGA-AC-A5XU-01	5.08615
TCGA-E2-A576-01	4.34201
TCGA-E9-A295-01	4.00231
TCGA-LD-A74U-01	4.48596
TCGA-E2-A570-01	4.03067
TCGA-E9-A1NF-01	4.25925
TCGA-E9-A1R4-01	4.67907
TCGA-B6-A409-01	3.97786
TCGA-EW-A423-01	4.21846
TCGA-OL-A6VO-01	5.16505
TCGA-EW-A6SD-01	4.14592
TCGA-GM-A2DH-01	4.97883
TCGA-LL-A5YM-01	4.09466
TCGA-BH-A0H6-01	4.03542
TCGA-E9-A1N8-01	5.11221
TCGA-AR-A24Z-01	4.48953
TCGA-A7-A4SD-01	4.68895
TCGA-AR-A0U0-01	4.85067
TCGA-BH-A203-01	4.25916
TCGA-E2-A1IK-01	4.28757
TCGA-D8-A13Y-01	5.81318
TCGA-AR-A1AX-01	4.62611
TCGA-E9-A1N9-01	4.42939
TCGA-C8-A1HN-01	4.55898
TCGA-A2-A0YC-01	4.43078
TCGA-A2-A0CL-01	4.70149
TCGA-D8-A1JA-01	4.32747
TCGA-D8-A1XM-01	4.61958
TCGA-A2-A04X-01	3.97437
TCGA-AO-A12A-01	4.28238
TCGA-E2-A1BC-01	4.08784
TCGA-A2-A25F-01	5.33643
TCGA-EW-A2FV-01	4.13511
TCGA-C8-A132-01	4.51934
TCGA-AN-A0AT-01	5.19576
TCGA-AC-A3QP-01	4.04322
TCGA-E9-A1R6-01	4.45839
TCGA-C8-A27B-01	4.9999
TCGA-E2-A14P-01	4.11695
TCGA-LL-A7SZ-01	4.34379
TCGA-BH-A0BO-01	4.59809
TCGA-BH-A0HX-01	3.73927
TCGA-A1-A0SF-01	4.0099
TCGA-BH-A0B9-01	4.9836
TCGA-D8-A1JG-01	4.22563
TCGA-D8-A1JN-01	4.02937
TCGA-A8-A06Z-01	4.28565
TCGA-A2-A0YD-01	4.36715
TCGA-D8-A1JB-01	4.3795
TCGA-JL-A3YX-01	4.40157
TCGA-A1-A0SK-01	5.98964
TCGA-AO-A03P-01	4.58912
TCGA-E2-A1LA-01	4.33382
TCGA-AN-A0FJ-01	4.78959
TCGA-LL-A7T0-01	4.57786
TCGA-D8-A141-01	4.78583
TCGA-BH-A0HB-01	3.68539
TCGA-C8-A12Z-01	3.83616
TCGA-A8-A08S-01	4.36568
TCGA-S3-AA10-01	5.02381
TCGA-E9-A22G-01	4.98152
TCGA-C8-A1HE-01	4.138
TCGA-E2-A2P5-01	4.18197
TCGA-AO-A0J9-01	4.28599
TCGA-AR-A1AK-01	4.38574
TCGA-C8-A27A-01	5.18659
TCGA-E9-A5UP-01	4.2252
TCGA-A2-A0T2-01	4.20239
TCGA-BH-A0C3-01	4.53957
TCGA-E2-A1IG-01	4.31501
TCGA-C8-A1HL-01	4.43158
TCGA-BH-A208-01	3.91705
TCGA-A2-A3KD-01	4.22422
TCGA-A2-A0YK-01	4.59991
TCGA-BH-A1FR-01	5.05756
TCGA-BH-A18J-01	4.09752
TCGA-B6-A0WY-01	3.73098
TCGA-AR-A24M-01	3.89122
TCGA-E9-A1NI-01	4.23337
TCGA-A8-A093-01	4.32781
TCGA-AC-A6NO-01	4.52848
TCGA-A8-A09M-01	4.14718
TCGA-EW-A1OV-01	4.89305
TCGA-C8-A278-01	4.40113
TCGA-AR-A1AP-01	4.18627
TCGA-E2-A1LS-01	3.86184
TCGA-A8-A09G-01	4.30637
TCGA-A8-A09R-01	4.90676
TCGA-GM-A5PX-01	3.86871
TCGA-E2-A1BD-01	4.10058
TCGA-E9-A1R2-01	4.52643
TCGA-AC-A62Y-01	4.31294
TCGA-AC-A2FO-01	4.38596
TCGA-AR-A1AY-01	5.01906
TCGA-AR-A2LN-01	4.38704
TCGA-D8-A27W-01	4.56121
TCGA-OL-A66O-01	4.24397
TCGA-BH-A0HU-01	4.38342
TCGA-AR-A1AH-01	5.03594
TCGA-A8-A081-01	4.52274
TCGA-C8-A8HQ-01	4.57556
TCGA-A2-A04Y-01	4.35133
TCGA-GM-A2DB-01	4.14815
TCGA-E9-A3Q9-01	4.334
TCGA-A8-A09I-01	4.33785
TCGA-A8-A07L-01	4.75068
TCGA-A2-A3XV-01	3.48652
TCGA-AR-A0TY-01	4.29021
TCGA-LL-A6FR-01	4.13479
TCGA-A2-A0CW-01	4.23559
TCGA-E2-A14O-01	3.70005
TCGA-D8-A1J9-01	3.95784
TCGA-A2-A0CQ-01	4.06099
TCGA-A8-A08Z-01	5.01358
TCGA-AC-A2FE-01	4.54382
TCGA-AO-A03N-01	3.78717
TCGA-EW-A2FW-01	4.66012
TCGA-AR-A2LL-01	4.51078
TCGA-AR-A24Q-01	4.66677
TCGA-AO-A0J3-01	4.6975
TCGA-AR-A2LK-01	4.6942
TCGA-A8-A08J-01	4.25119
TCGA-A2-A0YF-01	4.36659
TCGA-BH-A0AZ-01	4.02178
TCGA-E9-A22B-01	4.05201
TCGA-AC-A3W5-01	4.24829
TCGA-BH-A0C1-01	4.38876
TCGA-AN-A0XU-01	4.8853
TCGA-B6-A0RQ-01	3.8956
TCGA-D8-A1JL-01	5.02016
TCGA-D8-A1Y0-01	4.61112
TCGA-E9-A229-01	4.35014
TCGA-A8-A07I-01	4.50657
TCGA-OL-A5RU-01	4.26563
TCGA-AR-A5QP-01	4.13753
TCGA-D8-A1XZ-01	4.59246
TCGA-EW-A1PC-01	4.2692
TCGA-AO-A0J2-01	4.02948
TCGA-E2-A1LB-01	3.51521
TCGA-5T-A9QA-01	4.02779
TCGA-B6-A40C-01	4.72889
TCGA-A7-A0CH-01	4.1122
TCGA-E2-A9RU-01	4.2921
TCGA-A2-A0D2-01	4.89576
TCGA-BH-A1FE-06	4.62893
TCGA-AC-A8OR-01	4.372
TCGA-S3-A6ZH-01	4.32955
TCGA-E2-A14Z-01	4.43691
TCGA-E2-A1IF-01	4.12577
TCGA-D8-A27G-01	4.44241
TCGA-EW-A1PH-01	4.38516
TCGA-E2-A14Y-01	3.96315
TCGA-WT-AB41-01	4.10598
TCGA-AO-A1KQ-01	4.56265
TCGA-D8-A1JU-01	4.28972
TCGA-BH-A0DL-01	4.22494
TCGA-E2-A56Z-01	4.62221
TCGA-A7-A0D9-01	4.25956
TCGA-BH-A0DO-01	4.14433
TCGA-A2-A259-01	4.56037
TCGA-AN-A0XP-01	3.97646
TCGA-BH-A202-01	4.35513
TCGA-A2-A0YJ-01	4.78571
TCGA-B6-A0RH-01	3.7859
TCGA-D8-A1XD-01	4.8694
TCGA-A2-A0T7-01	4.2004
TCGA-AC-A2FG-01	4.15835
TCGA-BH-AB28-01	4.45548
TCGA-B6-A0RE-01	4.37486
TCGA-D8-A1JP-01	4.62783
TCGA-S3-A6ZF-01	4.44147
TCGA-AC-A3YJ-01	4.26285
TCGA-A2-A0YI-01	4.38716
TCGA-AN-A04C-01	3.8446
TCGA-B6-A0RO-01	3.38171
TCGA-A2-A0SX-01	4.94098
TCGA-E2-A14R-01	4.70082
TCGA-A7-A0DB-01	4.54061
TCGA-EW-A1OX-01	4.06705
TCGA-A7-A26F-01	4.7836
TCGA-AC-A2QH-01	5.6462
TCGA-AO-A1KR-01	4.45518
TCGA-BH-A1ES-01	4.44737
TCGA-B6-A0IE-01	3.39771
TCGA-EW-A1P5-01	4.27065
TCGA-E9-A5UO-01	4.31054
TCGA-HN-A2NL-01	5.28353
TCGA-GM-A2DN-01	4.34863
TCGA-C8-A12V-01	4.7977
TCGA-EW-A1J2-01	4.22715
TCGA-AR-A1AR-01	5.18781
TCGA-PL-A8LV-01	4.63905
TCGA-D8-A1JF-01	3.56032
TCGA-AC-A23E-01	4.49448
TCGA-BH-A0DH-01	3.6758
TCGA-C8-A12Y-01	3.96224
TCGA-BH-A0BG-01	4.41403
TCGA-BH-A18H-01	4.56524
TCGA-D8-A1JD-01	4.38476
TCGA-E9-A228-01	4.90788
TCGA-E9-A3HO-01	4.76436
TCGA-A2-A0EV-01	4.14413
TCGA-BH-A0EI-01	4.39771
TCGA-AN-A0XW-01	4.46122
TCGA-A8-A09A-01	4.03394
TCGA-A1-A0SG-01	4.05824
TCGA-BH-A1F6-01	4.80969
TCGA-E9-A249-01	4.24614
TCGA-BH-A1F2-01	3.95229
TCGA-A8-A096-01	4.43783
TCGA-AR-A1AI-01	4.93215
TCGA-AC-A3BB-01	4.31255
TCGA-BH-A0WA-01	4.72807
TCGA-AQ-A1H3-01	4.45418
TCGA-BH-A0E7-01	3.98701
TCGA-BH-A0RX-01	4.26899
TCGA-AO-A03U-01	4.15935
TCGA-AR-A24L-01	4.18664
TCGA-E2-A1IJ-01	4.25466
TCGA-E2-A150-01	4.68262
TCGA-E2-A15H-01	4.17973
TCGA-BH-A0E0-01	4.57976
TCGA-A2-A0D1-01	4.35366
TCGA-A8-A09D-01	4.40958
TCGA-AQ-A1H2-01	4.16815
TCGA-D8-A1JH-01	4.28233
TCGA-GM-A3NW-01	4.21503
TCGA-A7-A0CD-01	4.09152
TCGA-A7-A2KD-01	4.36892
TCGA-AO-A03L-01	4.26761
TCGA-AR-A2LR-01	5.15474
TCGA-E2-A14T-01	4.84765
TCGA-AR-A24U-01	4.41345
TCGA-BH-A28Q-01	4.36722
TCGA-C8-A3M7-01	4.13083
TCGA-BH-A0EE-01	3.9779
TCGA-3C-AALK-01	4.11352
TCGA-EW-A1OW-01	4.82511
TCGA-E2-A108-01	4.43374
TCGA-A2-A0D4-01	4.37608
TCGA-E9-A1RA-01	4.42435
TCGA-V7-A7HQ-01	3.63429
TCGA-AR-A24X-01	4.50745
TCGA-D8-A73X-01	4.31047
TCGA-BH-A0W4-01	4.36658
TCGA-BH-A1ET-01	4.13724
TCGA-BH-A0C7-01	4.57073
TCGA-LD-A7W5-01	4.66509
TCGA-D8-A1XK-01	5.30915
TCGA-A2-A0T4-01	4.14301
TCGA-AN-A0FX-01	4.57155
TCGA-A2-A0D3-01	4.25911
TCGA-D8-A1XS-01	4.40608
TCGA-C8-A138-01	4.22039
TCGA-AR-A24R-01	4.2195
TCGA-BH-A2L8-01	4.6311
TCGA-E2-A14V-01	3.82678
TCGA-AO-A0JE-01	3.97683
TCGA-A8-A06O-01	4.35673
TCGA-AO-A0J4-01	4.71878
TCGA-EW-A1P3-01	4.14635
TCGA-B6-A0WT-01	4.47655
TCGA-C8-A26W-01	4.44312
TCGA-AN-A041-01	4.41512
TCGA-D8-A1Y3-01	4.35582
TCGA-B6-A40B-01	4.27056
TCGA-B6-A1KI-01	3.83425
TCGA-A8-A090-01	4.35195
TCGA-BH-A0B6-01	3.90565
TCGA-A8-A09W-01	3.95255
TCGA-AO-A03M-01	4.2821
TCGA-E2-A1L6-01	4.36676
TCGA-AR-A0TQ-01	4.34356
TCGA-B6-A0RP-01	4.13648
TCGA-AN-A0FK-01	4.05914
TCGA-E9-A22D-01	4.73572
TCGA-BH-A18L-01	4.75524
TCGA-E9-A1RG-01	4.13405
TCGA-D8-A146-01	4.38648
TCGA-AO-A0JL-01	4.40007
TCGA-EW-A6SB-01	4.68856
TCGA-3C-AAAU-01	4.83493
TCGA-GM-A2DF-01	4.38555
TCGA-E2-A15J-01	4.34119
TCGA-EW-A424-01	4.1243
TCGA-A8-A07Z-01	4.18051
TCGA-BH-A0BF-01	4.44429
TCGA-E2-A154-01	4.46627
TCGA-A8-A08T-01	4.53915
TCGA-A8-A085-01	4.51986
TCGA-EW-A1P4-01	4.70178
TCGA-EW-A1J1-01	4.75541
TCGA-A8-A084-01	4.29084
TCGA-E9-A1R7-01	3.84534
TCGA-AO-A0JA-01	4.11541
TCGA-A2-A1G4-01	4.71404
TCGA-C8-A12K-01	4.95935
TCGA-A2-A0CK-01	4.51185
TCGA-A7-A4SE-01	4.87037
TCGA-C8-A274-01	4.05769
TCGA-BH-A0B0-01	4.09519
TCGA-BH-A1EY-01	4.29835
TCGA-C8-A12O-01	4.23827
TCGA-BH-A42U-01	4.13183
TCGA-AQ-A04H-01	4.50333
TCGA-A7-A425-01	4.64186
TCGA-AN-A049-01	4.32219
TCGA-A8-A06Y-01	3.79188
TCGA-AR-A2LE-01	4.37547
TCGA-AC-A23G-01	4.24461
TCGA-A7-A5ZV-01	4.12009
TCGA-BH-A0BL-01	4.76192
TCGA-EW-A1PA-01	4.57576
TCGA-E9-A1RC-01	4.45806
TCGA-A2-A1FV-01	4.90664
TCGA-BH-A0AU-01	4.03459
TCGA-LL-A73Y-01	4.75855
TCGA-D8-A1JC-01	4.27142
TCGA-E2-A1B4-01	3.91285
TCGA-A2-A0EW-01	4.34785
TCGA-E9-A1NG-01	4.38121
TCGA-AR-A1AL-01	4.55603
TCGA-LD-A7W6-01	4.35022
TCGA-JL-A3YW-01	4.3871
TCGA-A2-A1FX-01	4.89143
TCGA-BH-A1FJ-01	4.06024
TCGA-A2-A0EX-01	3.90862
TCGA-A2-A0CM-01	5.12619
TCGA-GM-A2DA-01	4.50679
TCGA-B6-A0X7-01	4.03351
TCGA-AR-A2LQ-01	4.10601
TCGA-W8-A86G-01	4.0364
TCGA-BH-A0HO-01	4.20666
TCGA-BH-A1FU-01	4.23041
TCGA-A8-A091-01	4.80029
TCGA-E9-A1N3-01	4.92563
TCGA-AR-A0U2-01	5.15213
TCGA-BH-A0W7-01	4.5253
TCGA-E9-A1R5-01	4.31214
TCGA-3C-AALI-01	4.39261
TCGA-E9-A1RI-01	4.26182
TCGA-A2-A0ER-01	4.38019
TCGA-3C-AALJ-01	4.82075
TCGA-E9-A6HE-01	4.16686
TCGA-A7-A5ZX-01	4.04272
TCGA-BH-A201-01	4.05322
TCGA-A2-A04W-01	3.65654
TCGA-D8-A73W-01	4.43674
TCGA-A7-A3IY-01	4.29409
TCGA-OL-A6VR-01	4.14974
TCGA-EW-A2FR-01	4.25103
TCGA-BH-A0HP-01	3.78714
TCGA-AR-A0TP-01	4.52508
TCGA-C8-A12X-01	4.1042
TCGA-D8-A1XJ-01	4.44463
TCGA-AR-A0TZ-01	4.85274
TCGA-EW-A1OY-01	4.18339
TCGA-GM-A2DC-01	4.45817
TCGA-BH-A18N-01	4.35775
TCGA-E9-A1ND-01	4.57084
TCGA-D8-A1XR-01	4.52537
TCGA-A2-A0ES-01	4.14196
TCGA-C8-A1HO-01	4.72521
TCGA-LL-A9Q3-01	3.85465
TCGA-A7-A3J1-01	4.37564
TCGA-AC-A5EH-01	4.32794
TCGA-E2-A15O-01	4.82693
TCGA-AC-A3W6-01	4.57933
TCGA-AN-A0FD-01	4.12098
TCGA-BH-A0BM-01	3.73533
TCGA-E9-A22H-01	4.49967
TCGA-EW-A1IY-01	4.41177
TCGA-E9-A3X8-01	3.87754
TCGA-AR-A24K-01	4.49479
TCGA-S3-AA11-01	4.29634
TCGA-EW-A6SA-01	4.69818
TCGA-A2-A0CP-01	4.02461
TCGA-B6-A0RU-01	4.65697
TCGA-B6-A0RS-01	4.07352
TCGA-A1-A0SN-01	4.23016
TCGA-EW-A1IZ-01	4.52731
TCGA-A7-A13F-01	3.97569
TCGA-D8-A1JT-01	4.16008
TCGA-D8-A1JM-01	4.53239
TCGA-BH-A0BQ-01	3.9774
TCGA-BH-A0EA-01	4.23362
TCGA-BH-A0BA-01	4.29802
TCGA-EW-A6SC-01	4.72683
TCGA-OL-A5DA-01	4.50088
TCGA-A2-A0T1-01	4.2311
TCGA-AO-A0JC-01	5.27495
TCGA-EW-A2FS-01	4.10573
TCGA-A8-A09K-01	4.81421
TCGA-E2-A107-01	3.96311
TCGA-A7-A6VY-01	4.49682
TCGA-E2-A14Q-01	4.33495
TCGA-E2-A15A-06	4.64827
TCGA-B6-A0IB-01	3.8204
TCGA-A8-A06Q-01	4.33811
TCGA-GM-A2DK-01	4.1455
TCGA-5L-AAT0-01	4.4566
TCGA-A7-A4SC-01	4.32031
TCGA-A2-A0CR-01	4.35808
TCGA-AC-A2QJ-01	4.38033
TCGA-AN-A03X-01	3.80303
TCGA-AN-A0FL-01	3.10014
TCGA-BH-A18P-01	4.45669
TCGA-AC-A3YI-01	4.55146
TCGA-A2-A0SY-01	4.39225
TCGA-GM-A2DM-01	4.45687
TCGA-D8-A1XF-01	4.98648
TCGA-BH-A1FM-01	4.17512
TCGA-BH-A0HN-01	4.26947
TCGA-AN-A0FV-01	4.10487
TCGA-B6-A0X0-01	4.10927
TCGA-AO-A03T-01	3.82276
TCGA-S3-AA15-01	4.8278
TCGA-AO-A12D-01	4.08397
TCGA-BH-A0DK-01	4.03956
TCGA-AO-A124-01	4.96363
TCGA-E2-A15R-01	5.0744
TCGA-D8-A1Y1-01	4.40089
TCGA-A2-A04T-01	5.12236
TCGA-UU-A93S-01	3.90056
TCGA-A2-A0T6-01	4.53042
TCGA-E2-A10F-01	4.59071
TCGA-EW-A1IW-01	4.48896
TCGA-E9-A1NC-01	4.19171
TCGA-AC-A3TM-01	4.08111
TCGA-E9-A1QZ-01	4.30775
TCGA-A8-A09C-01	4.32684
TCGA-D8-A73U-01	4.68468
TCGA-A8-A07E-01	4.63842
TCGA-AC-A3TN-01	3.97536
TCGA-AO-A0JF-01	3.80993
TCGA-E2-A153-01	4.18085
TCGA-BH-A0B5-01	4.74992
TCGA-A8-A07W-01	4.60519
TCGA-BH-A0B8-01	4.44958
TCGA-BH-A0B1-01	3.57628
TCGA-BH-A1FN-01	4.97635
TCGA-D8-A147-01	4.82223
TCGA-PL-A8LX-01	4.80714
TCGA-E9-A1N4-01	4.86584
TCGA-BH-A18F-01	4.35955
TCGA-D8-A27F-01	4.87955
TCGA-A8-A0AB-01	4.3779
TCGA-AR-A0TS-01	5.14969
TCGA-BH-A0H9-01	3.94859
TCGA-A8-A07U-01	4.6
TCGA-E2-A14X-01	4.69802
TCGA-C8-A131-01	4.04389
TCGA-BH-A1FL-01	4.62674
TCGA-C8-A12W-01	4.3845
TCGA-AC-A7VC-01	5.00403
TCGA-AO-A12E-01	4.19263
TCGA-E2-A1LI-01	4.8038
TCGA-AC-A2BM-01	4.68615
TCGA-A8-A07R-01	4.63156
TCGA-BH-A0AW-01	3.92427
TCGA-A7-A426-01	4.44339
TCGA-BH-A6R8-01	4.02362
TCGA-AC-A8OS-01	4.42671
TCGA-A2-A04Q-01	4.49352
TCGA-A7-A26H-01	4.15198
TCGA-A7-A4SF-01	4.35503
TCGA-D8-A27M-01	4.67933
TCGA-E9-A1NE-01	4.50067
TCGA-E2-A573-01	4.69757
TCGA-C8-A1HI-01	3.75334
TCGA-A7-A6VW-01	4.19284
TCGA-BH-A0B7-01	4.27771
TCGA-A8-A0A6-01	4.1208
TCGA-AO-A0J5-01	4.02967
TCGA-AO-A12H-01	4.53537
TCGA-E2-A15G-01	4.45513
TCGA-GM-A5PV-01	3.8217
TCGA-E9-A24A-01	4.56113
TCGA-AR-A2LM-01	4.38546
TCGA-E2-A1II-01	5.16886
TCGA-D8-A27P-01	4.08754
TCGA-EW-A1J3-01	4.42504
TCGA-B6-A0I8-01	3.74757
TCGA-AO-A1KS-01	4.8418
TCGA-A2-A4S2-01	4.37696
TCGA-BH-A6R9-01	4.60217
TCGA-BH-A8FZ-01	4.65575
TCGA-AC-A2FK-01	4.18134
TCGA-A2-A0T0-01	4.79759
TCGA-A8-A07S-01	4.33115
TCGA-GM-A2DI-01	4.84475
TCGA-E2-A106-01	4.12102
TCGA-BH-A0E6-01	4.52235
TCGA-AO-A03V-01	4.55681
TCGA-AC-A2BK-01	4.60782
TCGA-AR-A254-01	4.65057
TCGA-AO-A129-01	4.60165
TCGA-BH-A8FY-01	4.27806
TCGA-D8-A143-01	4.98667
TCGA-AC-A3W7-01	4.3059
TCGA-A8-A06X-01	4.52614
TCGA-AR-A255-01	4.10287
TCGA-BH-A0DZ-01	3.97799
TCGA-C8-A12T-01	4.34525
TCGA-AO-A12G-01	3.83017
TCGA-E2-A15L-01	4.36115
TCGA-AN-A0FF-01	4.52561
TCGA-A2-A3XX-01	4.80296
TCGA-EW-A1P8-01	5.00316
TCGA-A8-A097-01	4.29913
TCGA-BH-A0E1-01	4.22506
TCGA-BH-A0HF-01	3.64762
TCGA-E9-A5FL-01	3.36467
TCGA-AR-A1AW-01	4.99545
TCGA-AQ-A0Y5-01	4.1464
TCGA-OK-A5Q2-01	4.36906
TCGA-E2-A1B6-01	4.79253
TCGA-A8-A07P-01	4.05879
TCGA-AR-A0TW-01	4.32168
TCGA-E9-A1N6-01	4.18101
TCGA-BH-A1EU-01	4.71789
TCGA-A2-A0EQ-01	4.65614
TCGA-A8-A08C-01	4.43482
TCGA-OL-A5RW-01	4.45827
TCGA-B6-A0WS-01	4.24615
TCGA-BH-A42V-01	4.38866
TCGA-A2-A0YL-01	4.43605
TCGA-B6-A402-01	4.82967
TCGA-A7-A0CJ-01	4.39286
TCGA-E9-A22E-01	4.06486
TCGA-A2-A3Y0-01	4.50599
TCGA-AN-A0FZ-01	4.1371
TCGA-BH-A0DQ-01	4.11998
TCGA-A8-A07J-01	4.13357
TCGA-E9-A54X-01	4.46813
TCGA-B6-A1KC-01	4.99473
TCGA-BH-A18K-01	4.20181
TCGA-A2-A0EU-01	3.92713
TCGA-B6-A0IH-01	4.08237
TCGA-A2-A0EY-01	4.35661
TCGA-AO-A0JJ-01	4.07606
TCGA-C8-A26X-01	4.26544
TCGA-BH-A18Q-01	4.83067
TCGA-A8-A092-01	4.16709
TCGA-S3-AA12-01	4.4303
TCGA-BH-A1EO-01	4.31194
TCGA-A2-A4RW-01	4.40623
TCGA-D8-A142-01	4.56172
TCGA-A2-A0YE-01	4.44929
TCGA-A2-A04P-01	4.36695
TCGA-A2-A0CY-01	3.90638
TCGA-E9-A1RB-01	4.51737
TCGA-A7-A5ZW-01	4.01896
TCGA-E2-A1IN-01	4.34632
TCGA-EW-A6S9-01	4.38292
TCGA-AR-A5QM-01	4.43347
TCGA-AO-A0J7-01	4.77269
TCGA-A2-A3KC-01	4.36944
TCGA-E2-A15D-01	4.3492
TCGA-A2-A0YG-01	4.27308
TCGA-AO-A03O-01	4.51189
TCGA-OL-A66N-01	3.75572
TCGA-B6-A0I2-01	4.54791
TCGA-E2-A572-01	3.53358
TCGA-EW-A1PG-01	4.20672
TCGA-A7-A26G-01	4.20623
TCGA-B6-A0WV-01	3.95367
TCGA-AO-A0JM-01	4.01703
TCGA-D8-A1X7-01	4.17277
TCGA-C8-A3M8-01	4.22911
TCGA-LL-A5YN-01	4.1789
TCGA-B6-A0RG-01	3.74371
TCGA-AC-A3OD-01	4.7204
TCGA-A8-A08O-01	4.40766
TCGA-A8-A07B-01	4.25979
TCGA-A8-A08L-01	4.83106
TCGA-E2-A15I-01	4.66269
TCGA-BH-A0HQ-01	4.06203
TCGA-AR-A24V-01	4.22102
TCGA-EW-A1P1-01	4.28691
TCGA-EW-A3E8-01	4.41957
TCGA-A8-A07O-01	4.90576
TCGA-AN-A04D-01	4.71511
TCGA-E9-A2JT-01	5.14391
TCGA-A2-A4S3-01	4.34437
TCGA-AN-A0AK-01	4.47703
TCGA-AO-A1KO-01	4.19357
TCGA-BH-A1ES-06	4.42987
TCGA-AR-A1AV-01	4.46297
TCGA-A2-A0D0-01	4.81877
TCGA-A7-A13G-01	4.95302
TCGA-AC-A2QI-01	4.53103
TCGA-AC-A2FM-01	4.82468
TCGA-B6-A0X5-01	4.20664
TCGA-C8-A12L-01	4.32178
TCGA-AN-A0AS-01	4.37327
TCGA-A8-A0A2-01	4.47813
TCGA-LQ-A4E4-01	4.55846
TCGA-A1-A0SI-01	4.18915
TCGA-BH-A5J0-01	4.17251
TCGA-D8-A1Y2-01	4.74903
TCGA-A7-A3RF-01	4.88834
TCGA-A2-A0T5-01	4.13421
TCGA-BH-A1F5-01	4.24561
TCGA-LD-A66U-01	4.14149
TCGA-E9-A3QA-01	4.81722
TCGA-AO-A12F-01	4.94595
TCGA-A2-A25E-01	4.08003
TCGA-A8-A0A4-01	4.2149
TCGA-EW-A1J6-01	4.23965
TCGA-C8-A8HR-01	4.37447
TCGA-BH-A0BV-01	4.46747
TCGA-D8-A27T-01	4.5246
TCGA-E9-A1RE-01	4.3569
TCGA-A2-A0T3-01	4.1383
TCGA-E2-A15E-01	4.04043
TCGA-E9-A1N5-01	4.8159
TCGA-B6-A0RV-01	4.08614
TCGA-E2-A15P-01	4.10152
TCGA-AC-A3EH-01	4.0679
TCGA-BH-A1FB-01	4.42682
TCGA-A8-A07C-01	5.16853
TCGA-E9-A5FK-01	4.08252
TCGA-A2-A0CO-01	4.44759
TCGA-A8-A0A9-01	4.58855
TCGA-C8-A1HF-01	4.5429
TCGA-AQ-A54O-01	3.88333
TCGA-S3-AA17-01	4.62246
TCGA-MS-A51U-01	4.21456
TCGA-AC-A62V-01	4.09569
TCGA-GI-A2C8-01	4.28298
TCGA-BH-A18S-01	3.96283
TCGA-EW-A1P7-01	4.64272
TCGA-A8-A08P-01	4.41714
TCGA-A8-A095-01	4.35722
TCGA-EW-A1P0-01	4.44491
TCGA-A2-A4S1-01	4.71356
TCGA-AR-A0U3-01	4.54049
TCGA-BH-A0EB-01	4.22713
TCGA-E9-A54Y-01	4.07911
TCGA-D8-A1XU-01	3.81998
TCGA-OL-A66J-01	4.44979
TCGA-EW-A1PD-01	4.41769
TCGA-BH-A0BC-01	4.24373
TCGA-AC-A23H-01	3.82076
TCGA-D8-A1XC-01	4.68005
TCGA-AN-A0XV-01	4.02825
TCGA-A8-A08G-01	4.54737
TCGA-A2-A1FW-01	4.69034
TCGA-LL-A5YO-01	4.59281
TCGA-E9-A1RF-01	4.40746
TCGA-XX-A899-01	4.71365
TCGA-E2-A15K-06	4.25182
TCGA-AO-A0JI-01	4.47781
TCGA-AN-A0AM-01	4.15769
TCGA-AO-A128-01	5.10098
TCGA-C8-A12N-01	4.13799
TCGA-A7-A6VX-01	4.25421
TCGA-C8-A133-01	4.15806
TCGA-A2-A0CS-01	3.84221
TCGA-E2-A15K-01	4.5177
TCGA-A8-A083-01	4.24936
TCGA-XX-A89A-01	4.61062
TCGA-BH-A28O-01	4.34358
TCGA-B6-A0IC-01	4.54114
TCGA-B6-A401-01	4.44916
TCGA-AN-A0XS-01	4.3828
TCGA-A7-A0CG-01	4.09336
TCGA-A1-A0SM-01	4.04119
TCGA-D8-A27R-01	4.38233
TCGA-GM-A2DD-01	4.06914
TCGA-LL-A740-01	3.74513
TCGA-AR-A24T-01	4.13707
TCGA-BH-A0H0-01	4.49231
TCGA-A8-A09T-01	4.15628
TCGA-B6-A0WW-01	3.5917
TCGA-OL-A66L-01	4.04619
TCGA-A8-A0A7-01	4.11315
TCGA-A7-A4SA-01	4.48609
TCGA-A2-A0EN-01	4.4241
TCGA-B6-A0IO-01	4.19096
TCGA-AC-A8OQ-01	4.78825
TCGA-D8-A27E-01	4.60001
TCGA-BH-A8G0-01	4.54592
TCGA-A2-A3XW-01	3.65258
TCGA-BH-A0DP-01	4.08903
TCGA-PE-A5DD-01	4.48107
TCGA-OL-A66K-01	4.25966
TCGA-BH-A1FG-01	3.70797
TCGA-A2-A25D-01	4.37769
TCGA-S3-AA14-01	4.14305
TCGA-LL-A440-01	4.6968
TCGA-A2-A0SW-01	3.99577
TCGA-D8-A1XW-01	4.64929
TCGA-B6-A2IU-01	3.88226
TCGA-GM-A2DO-01	5.11576
TCGA-B6-A0IA-01	4.03621
TCGA-C8-A26Y-01	4.5218
TCGA-AN-A0G0-01	4.39975
TCGA-AO-A0JG-01	4.32
TCGA-E2-A1LH-01	4.43409
TCGA-AN-A0FY-01	4.7387
TCGA-E2-A1L9-01	4.36609
TCGA-BH-A0W5-01	4.64034
TCGA-AQ-A54N-01	4.62912
TCGA-GM-A3NY-01	4.10059
TCGA-A8-A09E-01	4.01222
TCGA-AR-A0TX-01	4.26434
TCGA-AQ-A04J-01	4.63648
TCGA-AR-A2LJ-01	4.40638
TCGA-OL-A66H-01	4.45614
TCGA-AC-A23C-01	4.31245
TCGA-D8-A1XQ-01	4.90972
TCGA-E2-A156-01	4.54258
TCGA-AC-A6IV-01	4.91692
TCGA-E2-A15E-06	4.21388
TCGA-D8-A1X6-01	4.67991
TCGA-A8-A0AD-01	4.50736
TCGA-A8-A07G-01	3.6965
TCGA-C8-A130-01	4.29386
TCGA-AN-A046-01	4.42582
TCGA-E2-A1AZ-01	4.83594
TCGA-B6-A400-01	4.81025
TCGA-Z7-A8R5-01	4.04473
TCGA-E2-A155-01	4.19154
TCGA-E2-A109-01	4.5694
TCGA-BH-A1EN-01	3.67456
TCGA-AR-A1AQ-01	4.92548
TCGA-E2-A574-01	3.82341
TCGA-A2-A1G0-01	4.54842
TCGA-AC-A4ZE-01	4.70362
TCGA-AR-A24O-01	4.43907
TCGA-BH-A0AV-01	4.95521
TCGA-C8-A137-01	3.70267
TCGA-B6-A0RL-01	4.97923
TCGA-OL-A5RV-01	4.43175
TCGA-B6-A0IM-01	4.61628
TCGA-B6-A0IK-01	4.04458
TCGA-B6-A0WX-01	4.21857
TCGA-AR-A24H-01	5.04431
TCGA-B6-A0IQ-01	5.1879
TCGA-D8-A27N-01	4.11839
TCGA-C8-A275-01	4.22358
TCGA-B6-A0IG-01	3.9727
TCGA-E9-A243-01	4.57553
TCGA-D8-A1JE-01	4.30306
TCGA-E2-A1LE-01	4.11042
TCGA-AC-A6IX-01	4.24195
TCGA-A8-A09Q-01	4.72977
TCGA-AN-A0AL-01	4.14525
TCGA-A2-A4RY-01	4.57521
TCGA-AR-A5QQ-01	4.10206
TCGA-D8-A140-01	4.2843
TCGA-A2-A0YH-01	4.32937
TCGA-B6-A3ZX-01	4.93177
TCGA-A1-A0SE-01	4.07813
TCGA-AR-A1AN-01	4.56315
TCGA-A8-A08R-01	4.94918
TCGA-OL-A5RX-01	4.24401
TCGA-AR-A2LO-01	4.57819
TCGA-BH-A0BD-01	4.21218
TCGA-AR-A24N-01	3.96602
TCGA-AR-A2LH-01	4.19275
TCGA-AR-A1AO-01	4.67268
TCGA-BH-A1EW-01	4.29448
TCGA-BH-A0W3-01	4.62004
TCGA-EW-A1PF-01	4.35617
TCGA-S3-A6ZG-01	4.61605
TCGA-E9-A22A-01	3.95383
TCGA-A2-A0YT-01	3.98299
TCGA-B6-A0IN-01	4.02271
TCGA-C8-A1HJ-01	5.10241
TCGA-AQ-A7U7-01	4.88562
TCGA-D8-A1JI-01	4.60671
TCGA-GM-A2D9-01	4.12962
TCGA-A8-A06R-01	4.66015
TCGA-AR-A1AT-01	4.43974
TCGA-AO-A1KP-01	4.37675
TCGA-AN-A0AJ-01	4.65506
TCGA-A8-A07F-01	4.23034
TCGA-GM-A3XG-01	3.85724
TCGA-AR-A0TV-01	4.57731
TCGA-A2-A3XY-01	4.84283
TCGA-BH-A0DD-01	4.65546
TCGA-A2-A1FZ-01	4.2147
TCGA-D8-A13Z-01	4.72406
TCGA-A2-A25C-01	4.4682
TCGA-AN-A0XR-01	4.33263
TCGA-B6-A0RN-01	4.00204
TCGA-AC-A2FB-01	4.54316
TCGA-AC-A7VB-01	4.63503
TCGA-A2-A0YM-01	5.21301
TCGA-OL-A5D8-01	4.77209
TCGA-D8-A1XL-01	4.23101
TCGA-AR-A252-01	4.5532
TCGA-BH-A18G-01	3.96576
TCGA-OL-A5D6-01	3.71691
TCGA-A8-A086-01	4.39091

## Sheet: Methotrexate
TCGA-D8-A1XO-01	1.00518
TCGA-AN-A0FN-01	0.326165
TCGA-AC-A62X-01	1.24233
TCGA-E2-A14U-01	0.966587
TCGA-E9-A1R3-01	0.945493
TCGA-BH-A18M-01	1.01745
TCGA-E2-A15T-01	0.602935
TCGA-AR-A0TU-01	-0.459017
TCGA-EW-A1IX-01	1.00684
TCGA-B6-A408-01	0.534126
TCGA-E2-A1IE-01	1.20863
TCGA-E2-A10E-01	1.21134
TCGA-EW-A3U0-01	-0.736299
TCGA-BH-A0H5-01	-0.944092
TCGA-E2-A14W-01	1.69192
TCGA-AQ-A04L-01	1.29605
TCGA-BH-A1FD-01	1.36904
TCGA-AR-A0TR-01	0.916396
TCGA-A7-A0CE-01	0.704334
TCGA-AO-A0J8-01	0.663553
TCGA-BH-A1F0-01	-0.480444
TCGA-A2-A0SU-01	0.694452
TCGA-AC-A2FF-01	0.0514365
TCGA-LL-A6FP-01	1.52952
TCGA-E2-A15S-01	0.589632
TCGA-E2-A14N-01	0.398665
TCGA-D8-A1JK-01	1.1531
TCGA-D8-A3Z6-01	1.28785
TCGA-A8-A06U-01	1.074
TCGA-A7-A13E-01	0.866224
TCGA-UL-AAZ6-01	0.999799
TCGA-B6-A0I9-01	1.05545
TCGA-A8-A099-01	1.15855
TCGA-OL-A5RY-01	0.291749
TCGA-E9-A1NA-01	1.16177
TCGA-D8-A1XV-01	0.982435
TCGA-BH-A18T-01	0.541075
TCGA-B6-A0RT-01	-1.94154
TCGA-A1-A0SJ-01	1.2123
TCGA-E9-A247-01	1.09174
TCGA-C8-A12P-01	1.48791
TCGA-A8-A09X-01	0.717457
TCGA-BH-A1FC-01	-0.131926
TCGA-A8-A082-01	0.363922
TCGA-C8-A12M-01	0.160256
TCGA-BH-A1EV-01	1.20448
TCGA-C8-A135-01	1.07154
TCGA-WT-AB44-01	1.77467
TCGA-A7-A3J0-01	0.706268
TCGA-E9-A1R0-01	0.52338
TCGA-B6-A0IJ-01	-0.541851
TCGA-LL-A441-01	-0.715552
TCGA-A2-A3XT-01	-0.20838
TCGA-D8-A27I-01	0.485932
TCGA-A8-A094-01	1.28298
TCGA-A2-A1G6-01	0.669082
TCGA-BH-A0GY-01	0.866642
TCGA-E2-A1B0-01	1.3573
TCGA-E9-A1RH-01	1.60682
TCGA-C8-A1HG-01	-0.0517285
TCGA-A1-A0SB-01	1.20394
TCGA-A7-A0DC-01	0.387877
TCGA-A7-A3IZ-01	0.276087
TCGA-LL-A5YL-01	1.23718
TCGA-BH-A0DI-01	1.32789
TCGA-E2-A1B1-01	0.513051
TCGA-BH-A0H3-01	0.47237
TCGA-D8-A27K-01	0.439696
TCGA-A2-A04U-01	0.305522
TCGA-AO-A0J6-01	0.969843
TCGA-BH-A0E2-01	1.38587
TCGA-E2-A1L8-01	1.19535
TCGA-OL-A5RZ-01	0.755405
TCGA-B6-A1KF-01	1.04751
TCGA-E2-A1L7-01	-0.172268
TCGA-B6-A0I6-01	0.295006
TCGA-AN-A0XL-01	1.13475
TCGA-A8-A08B-01	0.731586
TCGA-AC-A6IX-06	0.300021
TCGA-E2-A2P6-01	0.61911
TCGA-E2-A3DX-01	0.263173
TCGA-E2-A159-01	-0.429466
TCGA-E9-A1NH-01	1.13624
TCGA-A8-A0A1-01	0.312464
TCGA-D8-A4Z1-01	0.511963
TCGA-AR-A1AS-01	1.1024
TCGA-AR-A24P-01	0.779936
TCGA-A8-A09Z-01	0.710534
TCGA-BH-A0HL-01	0.762621
TCGA-A8-A08X-01	0.895481
TCGA-A8-A09V-01	0.225387
TCGA-D8-A1XT-01	0.73582
TCGA-GM-A4E0-01	0.347954
TCGA-AN-A0XN-01	1.25947
TCGA-A2-A04V-01	0.570553
TCGA-A7-A26I-01	0.550717
TCGA-A2-A3XS-01	0.0889161
TCGA-BH-A0BP-01	1.266
TCGA-AC-A3QQ-01	0.555598
TCGA-AO-A12C-01	1.05173
TCGA-E2-A1IH-01	0.678407
TCGA-BH-A0DS-01	0.96021
TCGA-AN-A0FS-01	0.89162
TCGA-E2-A15F-01	0.76517
TCGA-BH-A0H7-01	1.77348
TCGA-A8-A079-01	1.01491
TCGA-D8-A1XY-01	1.55134
TCGA-AO-A0JD-01	0.966193
TCGA-B6-A0WZ-01	1.68813
TCGA-D8-A1XB-01	1.05272
TCGA-BH-A0BS-01	1.28903
TCGA-BH-A1EX-01	0.784013
TCGA-D8-A1X8-01	0.949435
TCGA-HN-A2OB-01	0.910105
TCGA-B6-A0I1-01	1.25223
TCGA-OL-A97C-01	0.901208
TCGA-E2-A1LK-01	1.32415
TCGA-D8-A1J8-01	0.967944
TCGA-A8-A06P-01	1.21192
TCGA-D8-A3Z5-01	0.79745
TCGA-E2-A152-01	1.31706
TCGA-BH-A0DT-01	0.483658
TCGA-A1-A0SQ-01	1.29742
TCGA-BH-A1FE-01	0.250601
TCGA-BH-A0BR-01	1.42709
TCGA-BH-A18V-01	0.368926
TCGA-GM-A3XN-01	0.438272
TCGA-A8-A09B-01	1.1343
TCGA-PL-A8LY-01	0.521162
TCGA-E2-A10A-01	0.443097
TCGA-A7-A6VV-01	0.729111
TCGA-BH-A0BW-01	-0.229555
TCGA-AN-A04A-01	1.15826
TCGA-OL-A66P-01	0.7068
TCGA-A2-A0SV-01	1.0068
TCGA-E2-A1LG-01	1.00274
TCGA-E2-A1LL-01	0.642069
TCGA-A2-A0ET-01	0.12799
TCGA-B6-A0RI-01	1.00787
TCGA-BH-A0GZ-01	1.64796
TCGA-A2-A25A-01	0.354251
TCGA-A8-A06N-01	0.650791
TCGA-EW-A1J5-01	0.0333841
TCGA-D8-A27V-01	0.773209
TCGA-A2-A0ST-01	-0.741866
TCGA-A2-A0CT-01	1.34741
TCGA-AR-A0TT-01	-1.24875
TCGA-LL-A8F5-01	0.903037
TCGA-AN-A0FW-01	0.956599
TCGA-BH-A18U-01	1.42549
TCGA-E9-A248-01	0.500968
TCGA-A2-A0CU-01	0.908281
TCGA-BH-A0HY-01	1.85446
TCGA-D8-A1XG-01	1.34723
TCGA-BH-A204-01	0.839052
TCGA-AR-A0U4-01	-0.307195
TCGA-E2-A14S-01	0.22163
TCGA-D8-A1JS-01	1.21072
TCGA-C8-A1HK-01	0.850167
TCGA-AR-A250-01	1.11092
TCGA-EW-A1PB-01	-0.33554
TCGA-AC-A2B8-01	0.479849
TCGA-A8-A08I-01	-0.630848
TCGA-BH-A18V-06	-1.12526
TCGA-LL-A6FQ-01	1.34974
TCGA-A1-A0SP-01	0.0996951
TCGA-LL-A442-01	0.320179
TCGA-A2-A3XU-01	1.03585
TCGA-A2-A25B-01	0.952567
TCGA-AO-A1KT-01	1.55315
TCGA-B6-A1KN-01	0.746382
TCGA-LL-A5YP-01	0.495272
TCGA-AR-A1AU-01	0.944066
TCGA-A7-A26J-01	0.574503
TCGA-E9-A245-01	0.720148
TCGA-BH-A42T-01	0.761843
TCGA-A2-A0EM-01	0.929384
TCGA-PE-A5DC-01	0.741079
TCGA-A7-A13D-01	1.26125
TCGA-BH-A0HK-01	0.653497
TCGA-B6-A0IP-01	0.503716
TCGA-D8-A1XA-01	0.988934
TCGA-D8-A1X5-01	1.21995
TCGA-D8-A27L-01	0.471646
TCGA-D8-A1JJ-01	1.26957
TCGA-A2-A1G1-01	0.35687
TCGA-E2-A1IL-01	1.06255
TCGA-A7-A4SB-01	1.05609
TCGA-A7-A13H-01	0.173237
TCGA-BH-A0AY-01	0.845242
TCGA-A8-A075-01	0.753743
TCGA-E2-A158-01	0.629735
TCGA-BH-A0B4-01	1.37435
TCGA-BH-A0DV-01	1.0816
TCGA-A2-A0EP-01	-0.797697
TCGA-EW-A1PE-01	0.934992
TCGA-LL-A73Z-01	0.677513
TCGA-AR-A1AJ-01	-0.972653
TCGA-E9-A227-01	0.515296
TCGA-AO-A0JB-01	1.13615
TCGA-A8-A09N-01	1.30883
TCGA-E2-A15A-01	0.836814
TCGA-A8-A08A-01	0.6513
TCGA-AC-A5XS-01	0.809696
TCGA-BH-A209-01	-0.373693
TCGA-AR-A24S-01	0.51315
TCGA-A7-A26E-01	0.898887
TCGA-EW-A1P6-01	1.01797
TCGA-C8-A1HM-01	-0.404271
TCGA-OL-A6VQ-01	0.881941
TCGA-E2-A1B5-01	-0.398382
TCGA-A2-A0CV-01	0.804336
TCGA-5L-AAT1-01	0.0640302
TCGA-B6-A0X4-01	0.771512
TCGA-E2-A105-01	0.569596
TCGA-AC-A3HN-01	0.546805
TCGA-A1-A0SO-01	0.356814
TCGA-E2-A10B-01	0.875318
TCGA-A1-A0SH-01	1.94769
TCGA-E9-A2JS-01	0.848287
TCGA-A2-A04R-01	1.76471
TCGA-C8-A12Q-01	1.32625
TCGA-AN-A0FT-01	1.18814
TCGA-4H-AAAK-01	0.830823
TCGA-E2-A15M-01	-0.205178
TCGA-A8-A08H-01	-0.565617
TCGA-C8-A273-01	1.14964
TCGA-BH-A0DE-01	0.735565
TCGA-C8-A12U-01	0.291328
TCGA-A2-A0EO-01	1.14722
TCGA-AC-A6IW-01	-0.207384
TCGA-LL-A50Y-01	0.410624
TCGA-A7-A0DA-01	1.30415
TCGA-GM-A2DL-01	1.72625
TCGA-E9-A244-01	1.42
TCGA-E2-A15C-01	0.778598
TCGA-BH-A0BT-01	1.5768
TCGA-BH-A0E9-01	1.12202
TCGA-BH-A18I-01	0.476429
TCGA-BH-A0HI-01	1.24738
TCGA-A2-A0CZ-01	0.798936
TCGA-D8-A1X9-01	1.1658
TCGA-BH-A18R-01	0.974627
TCGA-AO-A12B-01	1.0147
TCGA-BH-A0B3-01	0.653543
TCGA-C8-A8HP-01	0.724375
TCGA-AR-A1AM-01	0.698083
TCGA-A2-A4S0-01	0.470996
TCGA-AO-A126-01	1.04046
TCGA-AR-A5QN-01	1.03692
TCGA-A8-A08F-01	0.282162
TCGA-PE-A5DE-01	-0.101022
TCGA-A8-A076-01	1.54019
TCGA-A2-A3XZ-01	-0.0545653
TCGA-AR-A256-01	0.772477
TCGA-BH-A0DG-01	1.07994
TCGA-C8-A26Z-01	1.07867
TCGA-BH-A0HW-01	1.01495
TCGA-A1-A0SD-01	1.14446
TCGA-A2-A0CX-01	1.25835
TCGA-AO-A03R-01	0.529832
TCGA-PL-A8LZ-01	0.00765801
TCGA-BH-A1F8-01	1.53355
TCGA-BH-A0BZ-01	0.693714
TCGA-AC-A8OP-01	1.04875
TCGA-GI-A2C9-01	1.19924
TCGA-AO-A125-01	0.930932
TCGA-EW-A1OZ-01	1.44126
TCGA-BH-A0C0-01	0.114052
TCGA-AN-A03Y-01	0.992279
TCGA-D8-A145-01	0.509557
TCGA-OL-A66I-01	-0.665521
TCGA-OL-A5S0-01	0.665816
TCGA-B6-A0I5-01	0.849134
TCGA-Z7-A8R6-01	0.792484
TCGA-LD-A9QF-01	0.103666
TCGA-C8-A134-01	0.408341
TCGA-AN-A0XT-01	0.911588
TCGA-BH-A0HA-01	1.01999
TCGA-AR-A251-01	0.511002
TCGA-C8-A26V-01	1.39003
TCGA-OL-A5D7-01	-0.574781
TCGA-E2-A1IU-01	0.607828
TCGA-AN-A0XO-01	1.85652
TCGA-AN-A0AR-01	1.08789
TCGA-E2-A1IO-01	0.634295
TCGA-D8-A27H-01	1.4635
TCGA-A7-A56D-01	1.8847
TCGA-GM-A3XL-01	-0.0553606
TCGA-BH-A0DX-01	1.15107
TCGA-A2-A4RX-01	0.661426
TCGA-B6-A0X1-01	0.692215
TCGA-S3-AA0Z-01	-0.563758
TCGA-BH-A1FH-01	0.864259
TCGA-AR-A24W-01	1.3952
TCGA-A8-A06T-01	0.597703
TCGA-B6-A0RM-01	0.658378
TCGA-A2-A04N-01	0.862799
TCGA-E9-A226-01	1.26303
TCGA-BH-A0BJ-01	1.03556
TCGA-E2-A10C-01	0.938014
TCGA-BH-A5IZ-01	0.823143
TCGA-E9-A1RD-01	0.897831
TCGA-AC-A5XU-01	0.731958
TCGA-E2-A576-01	1.23256
TCGA-E9-A295-01	1.58849
TCGA-LD-A74U-01	0.593054
TCGA-E2-A570-01	1.10948
TCGA-E9-A1NF-01	1.26773
TCGA-E9-A1R4-01	0.510927
TCGA-B6-A409-01	0.747229
TCGA-EW-A423-01	0.814764
TCGA-OL-A6VO-01	-0.310279
TCGA-EW-A6SD-01	1.0011
TCGA-GM-A2DH-01	0.012614
TCGA-LL-A5YM-01	1.29836
TCGA-BH-A0H6-01	1.4043
TCGA-E9-A1N8-01	0.351624
TCGA-AR-A24Z-01	1.10025
TCGA-A7-A4SD-01	0.54543
TCGA-AR-A0U0-01	-0.239686
TCGA-BH-A203-01	1.10616
TCGA-E2-A1IK-01	0.761139
TCGA-D8-A13Y-01	0.398137
TCGA-AR-A1AX-01	-0.498716
TCGA-E9-A1N9-01	0.863611
TCGA-C8-A1HN-01	0.49807
TCGA-A2-A0YC-01	0.581615
TCGA-A2-A0CL-01	-0.878808
TCGA-D8-A1JA-01	1.32501
TCGA-D8-A1XM-01	0.406908
TCGA-A2-A04X-01	0.70772
TCGA-AO-A12A-01	0.626591
TCGA-E2-A1BC-01	1.16552
TCGA-A2-A25F-01	-1.17865
TCGA-EW-A2FV-01	0.737263
TCGA-C8-A132-01	0.378105
TCGA-AN-A0AT-01	0.258847
TCGA-AC-A3QP-01	0.396884
TCGA-E9-A1R6-01	0.886324
TCGA-C8-A27B-01	-0.152408
TCGA-E2-A14P-01	1.06231
TCGA-LL-A7SZ-01	0.283645
TCGA-BH-A0BO-01	0.476789
TCGA-BH-A0HX-01	1.21439
TCGA-A1-A0SF-01	0.776147
TCGA-BH-A0B9-01	-1.17073
TCGA-D8-A1JG-01	0.740541
TCGA-D8-A1JN-01	1.34065
TCGA-A8-A06Z-01	1.14618
TCGA-A2-A0YD-01	0.580671
TCGA-D8-A1JB-01	0.166544
TCGA-JL-A3YX-01	1.0029
TCGA-A1-A0SK-01	-1.90235
TCGA-AO-A03P-01	0.384308
TCGA-E2-A1LA-01	0.927826
TCGA-AN-A0FJ-01	0.347644
TCGA-LL-A7T0-01	0.355192
TCGA-D8-A141-01	0.0740186
TCGA-BH-A0HB-01	0.928678
TCGA-C8-A12Z-01	1.73197
TCGA-A8-A08S-01	1.47804
TCGA-S3-AA10-01	-0.504153
TCGA-E9-A22G-01	0.303265
TCGA-C8-A1HE-01	1.05399
TCGA-E2-A2P5-01	1.38495
TCGA-AO-A0J9-01	0.853272
TCGA-AR-A1AK-01	0.186304
TCGA-C8-A27A-01	-0.156528
TCGA-E9-A5UP-01	1.13413
TCGA-A2-A0T2-01	1.02061
TCGA-BH-A0C3-01	0.636527
TCGA-E2-A1IG-01	1.17321
TCGA-C8-A1HL-01	0.953847
TCGA-BH-A208-01	1.7821
TCGA-A2-A3KD-01	1.56548
TCGA-A2-A0YK-01	-0.0781096
TCGA-BH-A1FR-01	0.165946
TCGA-BH-A18J-01	1.72219
TCGA-B6-A0WY-01	1.16243
TCGA-AR-A24M-01	0.941575
TCGA-E9-A1NI-01	1.27565
TCGA-A8-A093-01	1.27592
TCGA-AC-A6NO-01	0.489404
TCGA-A8-A09M-01	0.591989
TCGA-EW-A1OV-01	-0.0624805
TCGA-C8-A278-01	0.702314
TCGA-AR-A1AP-01	0.87537
TCGA-E2-A1LS-01	1.44246
TCGA-A8-A09G-01	1.04979
TCGA-A8-A09R-01	1.02867
TCGA-GM-A5PX-01	0.71124
TCGA-E2-A1BD-01	0.937836
TCGA-E9-A1R2-01	0.328741
TCGA-AC-A62Y-01	1.20726
TCGA-AC-A2FO-01	0.064878
TCGA-AR-A1AY-01	0.708345
TCGA-AR-A2LN-01	0.47244
TCGA-D8-A27W-01	0.76041
TCGA-OL-A66O-01	0.932818
TCGA-BH-A0HU-01	1.22265
TCGA-AR-A1AH-01	0.906818
TCGA-A8-A081-01	0.57883
TCGA-C8-A8HQ-01	0.941908
TCGA-A2-A04Y-01	0.707346
TCGA-GM-A2DB-01	1.23244
TCGA-E9-A3Q9-01	0.488391
TCGA-A8-A09I-01	1.02041
TCGA-A8-A07L-01	1.26573
TCGA-A2-A3XV-01	1.75648
TCGA-AR-A0TY-01	1.5514
TCGA-LL-A6FR-01	1.33629
TCGA-A2-A0CW-01	0.801873
TCGA-E2-A14O-01	2.09693
TCGA-D8-A1J9-01	1.46984
TCGA-A2-A0CQ-01	0.481827
TCGA-A8-A08Z-01	0.513547
TCGA-AC-A2FE-01	0.365371
TCGA-AO-A03N-01	1.75716
TCGA-EW-A2FW-01	0.910039
TCGA-AR-A2LL-01	0.577783
TCGA-AR-A24Q-01	1.08513
TCGA-AO-A0J3-01	0.379333
TCGA-AR-A2LK-01	0.992787
TCGA-A8-A08J-01	0.984207
TCGA-A2-A0YF-01	0.727372
TCGA-BH-A0AZ-01	1.21991
TCGA-E9-A22B-01	1.34091
TCGA-AC-A3W5-01	0.841528
TCGA-BH-A0C1-01	1.22992
TCGA-AN-A0XU-01	0.497864
TCGA-B6-A0RQ-01	0.979594
TCGA-D8-A1JL-01	0.0169869
TCGA-D8-A1Y0-01	0.374269
TCGA-E9-A229-01	0.636821
TCGA-A8-A07I-01	1.32523
TCGA-OL-A5RU-01	0.444729
TCGA-AR-A5QP-01	0.860451
TCGA-D8-A1XZ-01	0.206642
TCGA-EW-A1PC-01	1.57872
TCGA-AO-A0J2-01	0.642297
TCGA-E2-A1LB-01	2.02259
TCGA-5T-A9QA-01	1.31407
TCGA-B6-A40C-01	0.581573
TCGA-A7-A0CH-01	0.936011
TCGA-E2-A9RU-01	1.60505
TCGA-A2-A0D2-01	0.531156
TCGA-BH-A1FE-06	0.891683
TCGA-AC-A8OR-01	0.678852
TCGA-S3-A6ZH-01	0.821621
TCGA-E2-A14Z-01	-0.162729
TCGA-E2-A1IF-01	0.99799
TCGA-D8-A27G-01	0.890474
TCGA-EW-A1PH-01	1.04309
TCGA-E2-A14Y-01	0.897214
TCGA-WT-AB41-01	0.187655
TCGA-AO-A1KQ-01	0.427296
TCGA-D8-A1JU-01	0.670894
TCGA-BH-A0DL-01	-1.06153
TCGA-E2-A56Z-01	0.775984
TCGA-A7-A0D9-01	0.937181
TCGA-BH-A0DO-01	0.992676
TCGA-A2-A259-01	0.191746
TCGA-AN-A0XP-01	1.43582
TCGA-BH-A202-01	0.826853
TCGA-A2-A0YJ-01	1.45489
TCGA-B6-A0RH-01	1.63538
TCGA-D8-A1XD-01	1.16987
TCGA-A2-A0T7-01	1.25346
TCGA-AC-A2FG-01	0.70722
TCGA-BH-AB28-01	0.688312
TCGA-B6-A0RE-01	1.29871
TCGA-D8-A1JP-01	0.433948
TCGA-S3-A6ZF-01	1.09141
TCGA-AC-A3YJ-01	0.382797
TCGA-A2-A0YI-01	0.54271
TCGA-AN-A04C-01	0.831485
TCGA-B6-A0RO-01	1.82814
TCGA-A2-A0SX-01	-0.18396
TCGA-E2-A14R-01	0.0902127
TCGA-A7-A0DB-01	1.3841
TCGA-EW-A1OX-01	1.40823
TCGA-A7-A26F-01	0.315855
TCGA-AC-A2QH-01	-0.590888
TCGA-AO-A1KR-01	0.57773
TCGA-BH-A1ES-01	1.09513
TCGA-B6-A0IE-01	0.915262
TCGA-EW-A1P5-01	0.973838
TCGA-E9-A5UO-01	1.23175
TCGA-HN-A2NL-01	-1.5824
TCGA-GM-A2DN-01	0.241309
TCGA-C8-A12V-01	-0.617308
TCGA-EW-A1J2-01	0.508683
TCGA-AR-A1AR-01	-0.132663
TCGA-PL-A8LV-01	0.166392
TCGA-D8-A1JF-01	1.70866
TCGA-AC-A23E-01	0.984618
TCGA-BH-A0DH-01	1.16463
TCGA-C8-A12Y-01	1.32589
TCGA-BH-A0BG-01	-0.199928
TCGA-BH-A18H-01	0.128968
TCGA-D8-A1JD-01	1.32783
TCGA-E9-A228-01	0.607564
TCGA-E9-A3HO-01	0.0997489
TCGA-A2-A0EV-01	1.02045
TCGA-BH-A0EI-01	0.9465
TCGA-AN-A0XW-01	0.933701
TCGA-A8-A09A-01	1.26012
TCGA-A1-A0SG-01	1.18113
TCGA-BH-A1F6-01	0.30879
TCGA-E9-A249-01	1.00273
TCGA-BH-A1F2-01	1.501
TCGA-A8-A096-01	0.412234
TCGA-AR-A1AI-01	-0.519799
TCGA-AC-A3BB-01	0.28374
TCGA-BH-A0WA-01	0.942251
TCGA-AQ-A1H3-01	0.512939
TCGA-BH-A0E7-01	1.30146
TCGA-BH-A0RX-01	0.271064
TCGA-AO-A03U-01	0.439211
TCGA-AR-A24L-01	1.22749
TCGA-E2-A1IJ-01	0.694383
TCGA-E2-A150-01	0.546389
TCGA-E2-A15H-01	1.43815
TCGA-BH-A0E0-01	0.571423
TCGA-A2-A0D1-01	0.958065
TCGA-A8-A09D-01	0.998413
TCGA-AQ-A1H2-01	1.18536
TCGA-D8-A1JH-01	0.440844
TCGA-GM-A3NW-01	1.2377
TCGA-A7-A0CD-01	1.26069
TCGA-A7-A2KD-01	0.64085
TCGA-AO-A03L-01	1.12097
TCGA-AR-A2LR-01	-0.0605697
TCGA-E2-A14T-01	0.542756
TCGA-AR-A24U-01	0.444985
TCGA-BH-A28Q-01	0.531916
TCGA-C8-A3M7-01	0.777679
TCGA-BH-A0EE-01	0.97671
TCGA-3C-AALK-01	1.20086
TCGA-EW-A1OW-01	0.657735
TCGA-E2-A108-01	-0.262874
TCGA-A2-A0D4-01	0.801921
TCGA-E9-A1RA-01	0.832576
TCGA-V7-A7HQ-01	1.34029
TCGA-AR-A24X-01	0.544732
TCGA-D8-A73X-01	0.870458
TCGA-BH-A0W4-01	1.05145
TCGA-BH-A1ET-01	0.739701
TCGA-BH-A0C7-01	0.629222
TCGA-LD-A7W5-01	-0.891454
TCGA-D8-A1XK-01	-0.103217
TCGA-A2-A0T4-01	1.14845
TCGA-AN-A0FX-01	0.913597
TCGA-A2-A0D3-01	0.441401
TCGA-D8-A1XS-01	0.846893
TCGA-C8-A138-01	0.735435
TCGA-AR-A24R-01	0.637483
TCGA-BH-A2L8-01	-0.155388
TCGA-E2-A14V-01	1.44294
TCGA-AO-A0JE-01	1.11623
TCGA-A8-A06O-01	0.956042
TCGA-AO-A0J4-01	0.644644
TCGA-EW-A1P3-01	1.17875
TCGA-B6-A0WT-01	0.930682
TCGA-C8-A26W-01	0.473674
TCGA-AN-A041-01	0.961441
TCGA-D8-A1Y3-01	0.60903
TCGA-B6-A40B-01	1.61343
TCGA-B6-A1KI-01	1.27294
TCGA-A8-A090-01	0.890919
TCGA-BH-A0B6-01	0.41047
TCGA-A8-A09W-01	1.39116
TCGA-AO-A03M-01	0.45581
TCGA-E2-A1L6-01	0.773825
TCGA-AR-A0TQ-01	0.601575
TCGA-B6-A0RP-01	0.935888
TCGA-AN-A0FK-01	1.62358
TCGA-E9-A22D-01	-0.417312
TCGA-BH-A18L-01	0.660345
TCGA-E9-A1RG-01	1.17796
TCGA-D8-A146-01	1.27314
TCGA-AO-A0JL-01	1.14952
TCGA-EW-A6SB-01	-0.0825421
TCGA-3C-AAAU-01	0.69748
TCGA-GM-A2DF-01	0.384067
TCGA-E2-A15J-01	0.737549
TCGA-EW-A424-01	1.25571
TCGA-A8-A07Z-01	0.891991
TCGA-BH-A0BF-01	0.0394931
TCGA-E2-A154-01	0.93081
TCGA-A8-A08T-01	0.618419
TCGA-A8-A085-01	1.16464
TCGA-EW-A1P4-01	0.226733
TCGA-EW-A1J1-01	0.73409
TCGA-A8-A084-01	1.51415
TCGA-E9-A1R7-01	1.18387
TCGA-AO-A0JA-01	1.27471
TCGA-A2-A1G4-01	0.469136
TCGA-C8-A12K-01	-0.811359
TCGA-A2-A0CK-01	0.208381
TCGA-A7-A4SE-01	0.853728
TCGA-C8-A274-01	1.06635
TCGA-BH-A0B0-01	1.03928
TCGA-BH-A1EY-01	0.731202
TCGA-C8-A12O-01	1.07977
TCGA-BH-A42U-01	0.541151
TCGA-AQ-A04H-01	0.888154
TCGA-A7-A425-01	0.706589
TCGA-AN-A049-01	1.10383
TCGA-A8-A06Y-01	1.96606
TCGA-AR-A2LE-01	0.6291
TCGA-AC-A23G-01	1.01769
TCGA-A7-A5ZV-01	1.566
TCGA-BH-A0BL-01	0.184988
TCGA-EW-A1PA-01	0.634273
TCGA-E9-A1RC-01	1.23723
TCGA-A2-A1FV-01	0.471205
TCGA-BH-A0AU-01	0.917501
TCGA-LL-A73Y-01	0.701679
TCGA-D8-A1JC-01	1.15054
TCGA-E2-A1B4-01	0.924155
TCGA-A2-A0EW-01	0.721259
TCGA-E9-A1NG-01	0.840183
TCGA-AR-A1AL-01	0.10392
TCGA-LD-A7W6-01	0.202133
TCGA-JL-A3YW-01	0.737386
TCGA-A2-A1FX-01	0.419619
TCGA-BH-A1FJ-01	0.982575
TCGA-A2-A0EX-01	1.03295
TCGA-A2-A0CM-01	-0.44074
TCGA-GM-A2DA-01	0.467758
TCGA-B6-A0X7-01	0.722029
TCGA-AR-A2LQ-01	1.29022
TCGA-W8-A86G-01	1.00557
TCGA-BH-A0HO-01	0.653786
TCGA-BH-A1FU-01	0.743247
TCGA-A8-A091-01	0.132928
TCGA-E9-A1N3-01	0.970213
TCGA-AR-A0U2-01	-0.544688
TCGA-BH-A0W7-01	0.82577
TCGA-E9-A1R5-01	1.43314
TCGA-3C-AALI-01	0.586187
TCGA-E9-A1RI-01	0.903466
TCGA-A2-A0ER-01	0.866807
TCGA-3C-AALJ-01	0.449023
TCGA-E9-A6HE-01	1.31635
TCGA-A7-A5ZX-01	0.737248
TCGA-BH-A201-01	1.36351
TCGA-A2-A04W-01	2.3142
TCGA-D8-A73W-01	1.1258
TCGA-A7-A3IY-01	0.380632
TCGA-OL-A6VR-01	0.837642
TCGA-EW-A2FR-01	1.36683
TCGA-BH-A0HP-01	1.09774
TCGA-AR-A0TP-01	1.12002
TCGA-C8-A12X-01	1.17407
TCGA-D8-A1XJ-01	1.51721
TCGA-AR-A0TZ-01	1.14359
TCGA-EW-A1OY-01	1.27396
TCGA-GM-A2DC-01	0.544518
TCGA-BH-A18N-01	0.638568
TCGA-E9-A1ND-01	0.489924
TCGA-D8-A1XR-01	1.07776
TCGA-A2-A0ES-01	0.892363
TCGA-C8-A1HO-01	0.64831
TCGA-LL-A9Q3-01	1.45886
TCGA-A7-A3J1-01	-0.141953
TCGA-AC-A5EH-01	1.34345
TCGA-E2-A15O-01	0.584653
TCGA-AC-A3W6-01	0.469841
TCGA-AN-A0FD-01	1.47058
TCGA-BH-A0BM-01	1.23365
TCGA-E9-A22H-01	0.65092
TCGA-EW-A1IY-01	0.494682
TCGA-E9-A3X8-01	1.08707
TCGA-AR-A24K-01	0.841722
TCGA-S3-AA11-01	0.898379
TCGA-EW-A6SA-01	0.466095
TCGA-A2-A0CP-01	1.13936
TCGA-B6-A0RU-01	0.865906
TCGA-B6-A0RS-01	1.44627
TCGA-A1-A0SN-01	1.31473
TCGA-EW-A1IZ-01	-0.726037
TCGA-A7-A13F-01	1.22164
TCGA-D8-A1JT-01	0.915162
TCGA-D8-A1JM-01	0.407374
TCGA-BH-A0BQ-01	0.892863
TCGA-BH-A0EA-01	0.689559
TCGA-BH-A0BA-01	1.32467
TCGA-EW-A6SC-01	0.683663
TCGA-OL-A5DA-01	0.56526
TCGA-A2-A0T1-01	0.653983
TCGA-AO-A0JC-01	-4.55495
TCGA-EW-A2FS-01	0.492085
TCGA-A8-A09K-01	-0.379808
TCGA-E2-A107-01	1.23789
TCGA-A7-A6VY-01	0.445917
TCGA-E2-A14Q-01	1.14655
TCGA-E2-A15A-06	-0.207093
TCGA-B6-A0IB-01	1.8984
TCGA-A8-A06Q-01	1.51934
TCGA-GM-A2DK-01	0.952546
TCGA-5L-AAT0-01	0.224406
TCGA-A7-A4SC-01	1.01177
TCGA-A2-A0CR-01	-0.462808
TCGA-AC-A2QJ-01	0.682988
TCGA-AN-A03X-01	1.73991
TCGA-AN-A0FL-01	1.13503
TCGA-BH-A18P-01	0.579403
TCGA-AC-A3YI-01	0.575063
TCGA-A2-A0SY-01	0.527388
TCGA-GM-A2DM-01	0.571462
TCGA-D8-A1XF-01	0.593249
TCGA-BH-A1FM-01	1.33425
TCGA-BH-A0HN-01	0.952565
TCGA-AN-A0FV-01	1.54489
TCGA-B6-A0X0-01	0.878797
TCGA-AO-A03T-01	1.12767
TCGA-S3-AA15-01	-0.470487
TCGA-AO-A12D-01	1.03226
TCGA-BH-A0DK-01	0.637367
TCGA-AO-A124-01	0.958709
TCGA-E2-A15R-01	1.56981
TCGA-D8-A1Y1-01	0.989983
TCGA-A2-A04T-01	-0.509296
TCGA-UU-A93S-01	1.64949
TCGA-A2-A0T6-01	0.581399
TCGA-E2-A10F-01	0.676402
TCGA-EW-A1IW-01	1.26147
TCGA-E9-A1NC-01	0.891586
TCGA-AC-A3TM-01	0.568332
TCGA-E9-A1QZ-01	0.0273873
TCGA-A8-A09C-01	1.48426
TCGA-D8-A73U-01	0.266725
TCGA-A8-A07E-01	0.743566
TCGA-AC-A3TN-01	1.01567
TCGA-AO-A0JF-01	0.871718
TCGA-E2-A153-01	1.20338
TCGA-BH-A0B5-01	0.41165
TCGA-A8-A07W-01	0.79383
TCGA-BH-A0B8-01	1.35272
TCGA-BH-A0B1-01	1.33545
TCGA-BH-A1FN-01	0.572804
TCGA-D8-A147-01	0.342173
TCGA-PL-A8LX-01	0.287581
TCGA-E9-A1N4-01	0.039957
TCGA-BH-A18F-01	0.738717
TCGA-D8-A27F-01	0.995791
TCGA-A8-A0AB-01	0.958407
TCGA-AR-A0TS-01	-0.604223
TCGA-BH-A0H9-01	1.39294
TCGA-A8-A07U-01	0.035578
TCGA-E2-A14X-01	0.0737224
TCGA-C8-A131-01	0.862032
TCGA-BH-A1FL-01	0.227185
TCGA-C8-A12W-01	0.615071
TCGA-AC-A7VC-01	-0.310456
TCGA-AO-A12E-01	0.91697
TCGA-E2-A1LI-01	-0.00116383
TCGA-AC-A2BM-01	-0.0846602
TCGA-A8-A07R-01	0.802084
TCGA-BH-A0AW-01	0.620426
TCGA-A7-A426-01	0.265615
TCGA-BH-A6R8-01	1.32276
TCGA-AC-A8OS-01	0.740917
TCGA-A2-A04Q-01	-0.445044
TCGA-A7-A26H-01	0.843355
TCGA-A7-A4SF-01	1.01835
TCGA-D8-A27M-01	-0.0825228
TCGA-E9-A1NE-01	-0.253999
TCGA-E2-A573-01	-0.1952
TCGA-C8-A1HI-01	1.55963
TCGA-A7-A6VW-01	0.840548
TCGA-BH-A0B7-01	0.715751
TCGA-A8-A0A6-01	0.468375
TCGA-AO-A0J5-01	1.2174
TCGA-AO-A12H-01	0.927851
TCGA-E2-A15G-01	0.694666
TCGA-GM-A5PV-01	0.999242
TCGA-E9-A24A-01	0.327873
TCGA-AR-A2LM-01	0.457094
TCGA-E2-A1II-01	-0.943144
TCGA-D8-A27P-01	1.19706
TCGA-EW-A1J3-01	0.996045
TCGA-B6-A0I8-01	1.63258
TCGA-AO-A1KS-01	1.00125
TCGA-A2-A4S2-01	0.821119
TCGA-BH-A6R9-01	0.752047
TCGA-BH-A8FZ-01	0.26397
TCGA-AC-A2FK-01	0.478453
TCGA-A2-A0T0-01	0.908003
TCGA-A8-A07S-01	0.57725
TCGA-GM-A2DI-01	-0.139525
TCGA-E2-A106-01	1.26226
TCGA-BH-A0E6-01	0.903411
TCGA-AO-A03V-01	0.798157
TCGA-AC-A2BK-01	0.269877
TCGA-AR-A254-01	0.341078
TCGA-AO-A129-01	0.314166
TCGA-BH-A8FY-01	0.579654
TCGA-D8-A143-01	-0.220798
TCGA-AC-A3W7-01	0.89481
TCGA-A8-A06X-01	0.777019
TCGA-AR-A255-01	1.0736
TCGA-BH-A0DZ-01	1.18901
TCGA-C8-A12T-01	1.05275
TCGA-AO-A12G-01	1.43574
TCGA-E2-A15L-01	1.07632
TCGA-AN-A0FF-01	0.495701
TCGA-A2-A3XX-01	0.239362
TCGA-EW-A1P8-01	0.360024
TCGA-A8-A097-01	0.786524
TCGA-BH-A0E1-01	0.989789
TCGA-BH-A0HF-01	0.834712
TCGA-E9-A5FL-01	0.885042
TCGA-AR-A1AW-01	-1.29
TCGA-AQ-A0Y5-01	1.42914
TCGA-OK-A5Q2-01	0.383602
TCGA-E2-A1B6-01	-1.43393
TCGA-A8-A07P-01	1.56384
TCGA-AR-A0TW-01	0.966311
TCGA-E9-A1N6-01	1.58683
TCGA-BH-A1EU-01	0.134013
TCGA-A2-A0EQ-01	-0.427468
TCGA-A8-A08C-01	0.683484
TCGA-OL-A5RW-01	0.710499
TCGA-B6-A0WS-01	0.319808
TCGA-BH-A42V-01	0.152081
TCGA-A2-A0YL-01	0.444373
TCGA-B6-A402-01	0.644287
TCGA-A7-A0CJ-01	1.24363
TCGA-E9-A22E-01	1.43191
TCGA-A2-A3Y0-01	-0.473046
TCGA-AN-A0FZ-01	0.619523
TCGA-BH-A0DQ-01	1.15431
TCGA-A8-A07J-01	0.501858
TCGA-E9-A54X-01	1.01692
TCGA-B6-A1KC-01	0.743409
TCGA-BH-A18K-01	1.53298
TCGA-A2-A0EU-01	1.20445
TCGA-B6-A0IH-01	0.77222
TCGA-A2-A0EY-01	1.11902
TCGA-AO-A0JJ-01	0.42253
TCGA-C8-A26X-01	0.63977
TCGA-BH-A18Q-01	0.503371
TCGA-A8-A092-01	1.46567
TCGA-S3-AA12-01	0.801756
TCGA-BH-A1EO-01	0.962944
TCGA-A2-A4RW-01	0.818229
TCGA-D8-A142-01	1.03206
TCGA-A2-A0YE-01	1.10244
TCGA-A2-A04P-01	0.86536
TCGA-A2-A0CY-01	0.863557
TCGA-E9-A1RB-01	0.574127
TCGA-A7-A5ZW-01	0.773486
TCGA-E2-A1IN-01	1.33761
TCGA-EW-A6S9-01	1.27104
TCGA-AR-A5QM-01	1.22438
TCGA-AO-A0J7-01	1.44921
TCGA-A2-A3KC-01	0.711881
TCGA-E2-A15D-01	0.346525
TCGA-A2-A0YG-01	1.27571
TCGA-AO-A03O-01	0.591236
TCGA-OL-A66N-01	0.977134
TCGA-B6-A0I2-01	0.408044
TCGA-E2-A572-01	1.32043
TCGA-EW-A1PG-01	1.15737
TCGA-A7-A26G-01	0.550938
TCGA-B6-A0WV-01	1.85493
TCGA-AO-A0JM-01	1.77848
TCGA-D8-A1X7-01	0.879434
TCGA-C8-A3M8-01	1.51011
TCGA-LL-A5YN-01	0.0698079
TCGA-B6-A0RG-01	1.78152
TCGA-AC-A3OD-01	0.275423
TCGA-A8-A08O-01	0.999991
TCGA-A8-A07B-01	1.71958
TCGA-A8-A08L-01	0.362371
TCGA-E2-A15I-01	0.400791
TCGA-BH-A0HQ-01	1.25237
TCGA-AR-A24V-01	1.24863
TCGA-EW-A1P1-01	0.446512
TCGA-EW-A3E8-01	0.169098
TCGA-A8-A07O-01	0.194652
TCGA-AN-A04D-01	0.527802
TCGA-E9-A2JT-01	-2.55605
TCGA-A2-A4S3-01	1.03713
TCGA-AN-A0AK-01	0.855207
TCGA-AO-A1KO-01	0.969193
TCGA-BH-A1ES-06	0.483008
TCGA-AR-A1AV-01	0.917006
TCGA-A2-A0D0-01	0.183586
TCGA-A7-A13G-01	0.165597
TCGA-AC-A2QI-01	0.472248
TCGA-AC-A2FM-01	1.03159
TCGA-B6-A0X5-01	1.3582
TCGA-C8-A12L-01	1.3146
TCGA-AN-A0AS-01	1.58621
TCGA-A8-A0A2-01	0.592338
TCGA-LQ-A4E4-01	1.29317
TCGA-A1-A0SI-01	1.34909
TCGA-BH-A5J0-01	0.544808
TCGA-D8-A1Y2-01	0.539192
TCGA-A7-A3RF-01	1.1399
TCGA-A2-A0T5-01	0.765476
TCGA-BH-A1F5-01	1.05136
TCGA-LD-A66U-01	0.550564
TCGA-E9-A3QA-01	-0.239739
TCGA-AO-A12F-01	0.494664
TCGA-A2-A25E-01	0.978571
TCGA-A8-A0A4-01	1.26878
TCGA-EW-A1J6-01	1.06265
TCGA-C8-A8HR-01	0.220507
TCGA-BH-A0BV-01	0.881746
TCGA-D8-A27T-01	0.703989
TCGA-E9-A1RE-01	0.989959
TCGA-A2-A0T3-01	1.19952
TCGA-E2-A15E-01	1.20085
TCGA-E9-A1N5-01	0.52647
TCGA-B6-A0RV-01	0.685842
TCGA-E2-A15P-01	0.647046
TCGA-AC-A3EH-01	1.13591
TCGA-BH-A1FB-01	0.138141
TCGA-A8-A07C-01	-0.46536
TCGA-E9-A5FK-01	0.354478
TCGA-A2-A0CO-01	0.137738
TCGA-A8-A0A9-01	0.917209
TCGA-C8-A1HF-01	-0.182273
TCGA-AQ-A54O-01	0.988509
TCGA-S3-AA17-01	0.38407
TCGA-MS-A51U-01	0.823256
TCGA-AC-A62V-01	0.912601
TCGA-GI-A2C8-01	1.19327
TCGA-BH-A18S-01	1.19258
TCGA-EW-A1P7-01	-0.260096
TCGA-A8-A08P-01	0.294824
TCGA-A8-A095-01	0.486001
TCGA-EW-A1P0-01	0.367476
TCGA-A2-A4S1-01	0.730907
TCGA-AR-A0U3-01	1.31223
TCGA-BH-A0EB-01	0.82639
TCGA-E9-A54Y-01	1.40596
TCGA-D8-A1XU-01	1.809
TCGA-OL-A66J-01	0.782092
TCGA-EW-A1PD-01	0.986997
TCGA-BH-A0BC-01	0.690373
TCGA-AC-A23H-01	1.60947
TCGA-D8-A1XC-01	0.739603
TCGA-AN-A0XV-01	0.91591
TCGA-A8-A08G-01	0.664532
TCGA-A2-A1FW-01	0.686824
TCGA-LL-A5YO-01	-0.3822
TCGA-E9-A1RF-01	1.03637
TCGA-XX-A899-01	-0.0419149
TCGA-E2-A15K-06	0.581997
TCGA-AO-A0JI-01	0.916284
TCGA-AN-A0AM-01	1.4006
TCGA-AO-A128-01	-0.735217
TCGA-C8-A12N-01	0.789571
TCGA-A7-A6VX-01	1.32983
TCGA-C8-A133-01	1.30551
TCGA-A2-A0CS-01	1.71064
TCGA-E2-A15K-01	0.166037
TCGA-A8-A083-01	0.756031
TCGA-XX-A89A-01	0.667894
TCGA-BH-A28O-01	0.52867
TCGA-B6-A0IC-01	0.538015
TCGA-B6-A401-01	1.11494
TCGA-AN-A0XS-01	0.637773
TCGA-A7-A0CG-01	0.497294
TCGA-A1-A0SM-01	1.85019
TCGA-D8-A27R-01	0.299497
TCGA-GM-A2DD-01	0.848679
TCGA-LL-A740-01	1.40211
TCGA-AR-A24T-01	0.901655
TCGA-BH-A0H0-01	0.680408
TCGA-A8-A09T-01	0.932468
TCGA-B6-A0WW-01	1.71857
TCGA-OL-A66L-01	0.727241
TCGA-A8-A0A7-01	0.314679
TCGA-A7-A4SA-01	0.505882
TCGA-A2-A0EN-01	0.784497
TCGA-B6-A0IO-01	0.810306
TCGA-AC-A8OQ-01	-0.137293
TCGA-D8-A27E-01	0.997378
TCGA-BH-A8G0-01	0.0712849
TCGA-A2-A3XW-01	0.855971
TCGA-BH-A0DP-01	0.920573
TCGA-PE-A5DD-01	1.10566
TCGA-OL-A66K-01	0.802275
TCGA-BH-A1FG-01	1.4798
TCGA-A2-A25D-01	-0.0350537
TCGA-S3-AA14-01	1.44031
TCGA-LL-A440-01	0.378556
TCGA-A2-A0SW-01	0.655939
TCGA-D8-A1XW-01	0.559288
TCGA-B6-A2IU-01	0.991494
TCGA-GM-A2DO-01	-1.93764
TCGA-B6-A0IA-01	1.4525
TCGA-C8-A26Y-01	0.481485
TCGA-AN-A0G0-01	0.663363
TCGA-AO-A0JG-01	0.340547
TCGA-E2-A1LH-01	0.257184
TCGA-AN-A0FY-01	0.292911
TCGA-E2-A1L9-01	0.84721
TCGA-BH-A0W5-01	-0.350251
TCGA-AQ-A54N-01	0.357961
TCGA-GM-A3NY-01	0.861114
TCGA-A8-A09E-01	1.66283
TCGA-AR-A0TX-01	0.517028
TCGA-AQ-A04J-01	-0.292758
TCGA-AR-A2LJ-01	0.438807
TCGA-OL-A66H-01	0.3458
TCGA-AC-A23C-01	0.903384
TCGA-D8-A1XQ-01	0.259986
TCGA-E2-A156-01	0.512538
TCGA-AC-A6IV-01	0.0773468
TCGA-E2-A15E-06	0.695998
TCGA-D8-A1X6-01	0.0624585
TCGA-A8-A0AD-01	1.00498
TCGA-A8-A07G-01	1.55021
TCGA-C8-A130-01	0.941765
TCGA-AN-A046-01	0.964244
TCGA-E2-A1AZ-01	-0.242738
TCGA-B6-A400-01	0.568073
TCGA-Z7-A8R5-01	0.470482
TCGA-E2-A155-01	0.520459
TCGA-E2-A109-01	1.01393
TCGA-BH-A1EN-01	2.31648
TCGA-AR-A1AQ-01	-0.440193
TCGA-E2-A574-01	0.880909
TCGA-A2-A1G0-01	-0.0502051
TCGA-AC-A4ZE-01	0.754577
TCGA-AR-A24O-01	0.61444
TCGA-BH-A0AV-01	0.786641
TCGA-C8-A137-01	1.37791
TCGA-B6-A0RL-01	0.954749
TCGA-OL-A5RV-01	0.871705
TCGA-B6-A0IM-01	0.654873
TCGA-B6-A0IK-01	1.35889
TCGA-B6-A0WX-01	1.02359
TCGA-AR-A24H-01	0.0243246
TCGA-B6-A0IQ-01	0.105821
TCGA-D8-A27N-01	1.15854
TCGA-C8-A275-01	0.369579
TCGA-B6-A0IG-01	1.31723
TCGA-E9-A243-01	-0.591553
TCGA-D8-A1JE-01	0.96287
TCGA-E2-A1LE-01	0.380759
TCGA-AC-A6IX-01	0.754248
TCGA-A8-A09Q-01	0.63866
TCGA-AN-A0AL-01	0.663446
TCGA-A2-A4RY-01	0.182862
TCGA-AR-A5QQ-01	-0.153995
TCGA-D8-A140-01	0.670582
TCGA-A2-A0YH-01	0.63449
TCGA-B6-A3ZX-01	-1.5263
TCGA-A1-A0SE-01	0.991414
TCGA-AR-A1AN-01	1.09283
TCGA-A8-A08R-01	0.670156
TCGA-OL-A5RX-01	0.354694
TCGA-AR-A2LO-01	0.0793054
TCGA-BH-A0BD-01	0.620209
TCGA-AR-A24N-01	1.0391
TCGA-AR-A2LH-01	-0.1797
TCGA-AR-A1AO-01	0.0370414
TCGA-BH-A1EW-01	0.511146
TCGA-BH-A0W3-01	0.681977
TCGA-EW-A1PF-01	1.10379
TCGA-S3-A6ZG-01	0.19849
TCGA-E9-A22A-01	1.06424
TCGA-A2-A0YT-01	0.781172
TCGA-B6-A0IN-01	1.16009
TCGA-C8-A1HJ-01	0.0279552
TCGA-AQ-A7U7-01	-0.387447
TCGA-D8-A1JI-01	1.02939
TCGA-GM-A2D9-01	0.911286
TCGA-A8-A06R-01	0.480855
TCGA-AR-A1AT-01	0.447603
TCGA-AO-A1KP-01	0.977694
TCGA-AN-A0AJ-01	0.515465
TCGA-A8-A07F-01	1.15582
TCGA-GM-A3XG-01	1.08406
TCGA-AR-A0TV-01	0.1591
TCGA-A2-A3XY-01	0.187352
TCGA-BH-A0DD-01	1.09119
TCGA-A2-A1FZ-01	0.862792
TCGA-D8-A13Z-01	0.908809
TCGA-A2-A25C-01	1.06105
TCGA-AN-A0XR-01	0.936973
TCGA-B6-A0RN-01	1.18254
TCGA-AC-A2FB-01	-0.140546
TCGA-AC-A7VB-01	0.924042
TCGA-A2-A0YM-01	0.00332593
TCGA-OL-A5D8-01	0.320115
TCGA-D8-A1XL-01	0.0789991
TCGA-AR-A252-01	0.0491636
TCGA-BH-A18G-01	1.00788
TCGA-OL-A5D6-01	1.55644
TCGA-A8-A086-01	1.2254

## Sheet: paclitaxel
TCGA-D8-A1XO-01	-2.3248
TCGA-AN-A0FN-01	-3.04269
TCGA-AC-A62X-01	-3.537
TCGA-E2-A14U-01	-3.10003
TCGA-E9-A1R3-01	-2.17888
TCGA-BH-A18M-01	-2.91714
TCGA-E2-A15T-01	-1.66311
TCGA-AR-A0TU-01	-3.30381
TCGA-EW-A1IX-01	-2.80987
TCGA-B6-A408-01	-3.29115
TCGA-E2-A1IE-01	-2.09471
TCGA-E2-A10E-01	-2.52401
TCGA-EW-A3U0-01	-3.40634
TCGA-BH-A0H5-01	-2.93196
TCGA-E2-A14W-01	-2.29053
TCGA-AQ-A04L-01	-3.01218
TCGA-BH-A1FD-01	-2.36831
TCGA-AR-A0TR-01	-1.57235
TCGA-A7-A0CE-01	-2.94826
TCGA-AO-A0J8-01	-2.33435
TCGA-BH-A1F0-01	-2.89845
TCGA-A2-A0SU-01	-2.98236
TCGA-AC-A2FF-01	-2.57866
TCGA-LL-A6FP-01	-2.72639
TCGA-E2-A15S-01	-1.89782
TCGA-E2-A14N-01	-3.27567
TCGA-D8-A1JK-01	-3.00143
TCGA-D8-A3Z6-01	-2.95995
TCGA-A8-A06U-01	-3.10032
TCGA-A7-A13E-01	-2.96506
TCGA-UL-AAZ6-01	-3.20195
TCGA-B6-A0I9-01	-2.53203
TCGA-A8-A099-01	-2.48442
TCGA-OL-A5RY-01	-4.0672
TCGA-E9-A1NA-01	-3.18983
TCGA-D8-A1XV-01	-1.40317
TCGA-BH-A18T-01	-3.11826
TCGA-B6-A0RT-01	-3.33632
TCGA-A1-A0SJ-01	-2.62655
TCGA-E9-A247-01	-2.69118
TCGA-C8-A12P-01	-3.4245
TCGA-A8-A09X-01	-3.1734
TCGA-BH-A1FC-01	-3.33782
TCGA-A8-A082-01	-2.42845
TCGA-C8-A12M-01	-1.24178
TCGA-BH-A1EV-01	-2.7434
TCGA-C8-A135-01	-3.48476
TCGA-WT-AB44-01	-2.91142
TCGA-A7-A3J0-01	-2.15245
TCGA-E9-A1R0-01	-2.73426
TCGA-B6-A0IJ-01	-3.73272
TCGA-LL-A441-01	-3.22983
TCGA-A2-A3XT-01	-2.79034
TCGA-D8-A27I-01	-2.54871
TCGA-A8-A094-01	-3.06225
TCGA-A2-A1G6-01	-2.71452
TCGA-BH-A0GY-01	-3.48969
TCGA-E2-A1B0-01	-3.0234
TCGA-E9-A1RH-01	-2.84364
TCGA-C8-A1HG-01	-2.7226
TCGA-A1-A0SB-01	-3.20741
TCGA-A7-A0DC-01	-1.40171
TCGA-A7-A3IZ-01	-2.26962
TCGA-LL-A5YL-01	-3.93958
TCGA-BH-A0DI-01	-3.09873
TCGA-E2-A1B1-01	-2.90185
TCGA-BH-A0H3-01	-2.44799
TCGA-D8-A27K-01	-2.19153
TCGA-A2-A04U-01	-4.279
TCGA-AO-A0J6-01	-3.42281
TCGA-BH-A0E2-01	-3.2029
TCGA-E2-A1L8-01	-2.59972
TCGA-OL-A5RZ-01	-3.23713
TCGA-B6-A1KF-01	-2.66379
TCGA-E2-A1L7-01	-3.30866
TCGA-B6-A0I6-01	-3.22695
TCGA-AN-A0XL-01	-2.72167
TCGA-A8-A08B-01	-3.37139
TCGA-AC-A6IX-06	-2.32246
TCGA-E2-A2P6-01	-2.71497
TCGA-E2-A3DX-01	-2.7681
TCGA-E2-A159-01	-3.25425
TCGA-E9-A1NH-01	-2.97951
TCGA-A8-A0A1-01	-2.46641
TCGA-D8-A4Z1-01	-3.00673
TCGA-AR-A1AS-01	-2.43299
TCGA-AR-A24P-01	-2.26297
TCGA-A8-A09Z-01	-2.69329
TCGA-BH-A0HL-01	-1.77998
TCGA-A8-A08X-01	-3.45604
TCGA-A8-A09V-01	-1.96766
TCGA-D8-A1XT-01	-2.56804
TCGA-GM-A4E0-01	-2.66112
TCGA-AN-A0XN-01	-2.44146
TCGA-A2-A04V-01	-2.73541
TCGA-A7-A26I-01	-2.32466
TCGA-A2-A3XS-01	-3.5901
TCGA-BH-A0BP-01	-2.76934
TCGA-AC-A3QQ-01	-1.02003
TCGA-AO-A12C-01	-2.30534
TCGA-E2-A1IH-01	-2.429
TCGA-BH-A0DS-01	-2.51914
TCGA-AN-A0FS-01	-2.6975
TCGA-E2-A15F-01	-2.05047
TCGA-BH-A0H7-01	-3.19807
TCGA-A8-A079-01	-3.17373
TCGA-D8-A1XY-01	-2.49042
TCGA-AO-A0JD-01	-2.99392
TCGA-B6-A0WZ-01	-2.92544
TCGA-D8-A1XB-01	-2.82385
TCGA-BH-A0BS-01	-2.63669
TCGA-BH-A1EX-01	-1.7017
TCGA-D8-A1X8-01	-2.28264
TCGA-HN-A2OB-01	-2.79613
TCGA-B6-A0I1-01	-3.43135
TCGA-OL-A97C-01	-2.75777
TCGA-E2-A1LK-01	-3.69461
TCGA-D8-A1J8-01	-1.87367
TCGA-A8-A06P-01	-2.72389
TCGA-D8-A3Z5-01	-3.18146
TCGA-E2-A152-01	-2.79974
TCGA-BH-A0DT-01	-2.95666
TCGA-A1-A0SQ-01	-2.25036
TCGA-BH-A1FE-01	-2.7059
TCGA-BH-A0BR-01	-3.35448
TCGA-BH-A18V-01	-3.26895
TCGA-GM-A3XN-01	-3.16992
TCGA-A8-A09B-01	-2.44559
TCGA-PL-A8LY-01	-4.00342
TCGA-E2-A10A-01	-2.37029
TCGA-A7-A6VV-01	-3.96729
TCGA-BH-A0BW-01	-2.68733
TCGA-AN-A04A-01	-2.9558
TCGA-OL-A66P-01	-3.9504
TCGA-A2-A0SV-01	-3.11085
TCGA-E2-A1LG-01	-4.039
TCGA-E2-A1LL-01	-4.35888
TCGA-A2-A0ET-01	-1.57101
TCGA-B6-A0RI-01	-2.82593
TCGA-BH-A0GZ-01	-3.09146
TCGA-A2-A25A-01	-3.19906
TCGA-A8-A06N-01	-1.23847
TCGA-EW-A1J5-01	-2.11994
TCGA-D8-A27V-01	-2.93677
TCGA-A2-A0ST-01	-3.48963
TCGA-A2-A0CT-01	-2.8855
TCGA-AR-A0TT-01	-2.21815
TCGA-LL-A8F5-01	-3.98485
TCGA-AN-A0FW-01	-2.7385
TCGA-BH-A18U-01	-3.01525
TCGA-E9-A248-01	-2.95386
TCGA-A2-A0CU-01	-1.91558
TCGA-BH-A0HY-01	-2.77839
TCGA-D8-A1XG-01	-2.22052
TCGA-BH-A204-01	-0.675618
TCGA-AR-A0U4-01	-2.8835
TCGA-E2-A14S-01	-2.07248
TCGA-D8-A1JS-01	-3.15894
TCGA-C8-A1HK-01	-2.35332
TCGA-AR-A250-01	-2.69213
TCGA-EW-A1PB-01	-3.88747
TCGA-AC-A2B8-01	-2.48371
TCGA-A8-A08I-01	-2.31828
TCGA-BH-A18V-06	-2.93023
TCGA-LL-A6FQ-01	-3.64166
TCGA-A1-A0SP-01	-3.69011
TCGA-LL-A442-01	-1.50151
TCGA-A2-A3XU-01	-3.9573
TCGA-A2-A25B-01	-2.63633
TCGA-AO-A1KT-01	-2.70132
TCGA-B6-A1KN-01	-2.83079
TCGA-LL-A5YP-01	-3.65509
TCGA-AR-A1AU-01	-2.40026
TCGA-A7-A26J-01	-2.36238
TCGA-E9-A245-01	-2.2456
TCGA-BH-A42T-01	-3.45181
TCGA-A2-A0EM-01	-2.54035
TCGA-PE-A5DC-01	-3.56792
TCGA-A7-A13D-01	-2.80153
TCGA-BH-A0HK-01	-2.87706
TCGA-B6-A0IP-01	-2.993
TCGA-D8-A1XA-01	-2.35639
TCGA-D8-A1X5-01	-1.95059
TCGA-D8-A27L-01	-2.76737
TCGA-D8-A1JJ-01	-2.6164
TCGA-A2-A1G1-01	-3.05825
TCGA-E2-A1IL-01	-2.52685
TCGA-A7-A4SB-01	-2.29516
TCGA-A7-A13H-01	-2.79109
TCGA-BH-A0AY-01	-3.09744
TCGA-A8-A075-01	-2.94918
TCGA-E2-A158-01	-2.37827
TCGA-BH-A0B4-01	-3.39838
TCGA-BH-A0DV-01	-3.07558
TCGA-A2-A0EP-01	-2.9194
TCGA-EW-A1PE-01	-2.89318
TCGA-LL-A73Z-01	-4.08619
TCGA-AR-A1AJ-01	-2.85213
TCGA-E9-A227-01	-2.83277
TCGA-AO-A0JB-01	-3.64573
TCGA-A8-A09N-01	-2.98424
TCGA-E2-A15A-01	-2.56663
TCGA-A8-A08A-01	-2.34635
TCGA-AC-A5XS-01	-3.66108
TCGA-BH-A209-01	-3.13434
TCGA-AR-A24S-01	-2.62051
TCGA-A7-A26E-01	-1.35809
TCGA-EW-A1P6-01	-2.95835
TCGA-C8-A1HM-01	-2.87996
TCGA-OL-A6VQ-01	-3.0982
TCGA-E2-A1B5-01	-2.89255
TCGA-A2-A0CV-01	-3.17795
TCGA-5L-AAT1-01	-3.34932
TCGA-B6-A0X4-01	-1.22449
TCGA-E2-A105-01	-2.24924
TCGA-AC-A3HN-01	-3.05477
TCGA-A1-A0SO-01	-2.64368
TCGA-E2-A10B-01	-2.6368
TCGA-A1-A0SH-01	-2.67205
TCGA-E9-A2JS-01	-2.22079
TCGA-A2-A04R-01	-2.79456
TCGA-C8-A12Q-01	-2.59358
TCGA-AN-A0FT-01	-3.03271
TCGA-4H-AAAK-01	-3.46776
TCGA-E2-A15M-01	-2.66106
TCGA-A8-A08H-01	-2.86694
TCGA-C8-A273-01	-3.29171
TCGA-BH-A0DE-01	-2.36665
TCGA-C8-A12U-01	-2.37964
TCGA-A2-A0EO-01	-2.73705
TCGA-AC-A6IW-01	-4.18455
TCGA-LL-A50Y-01	-3.44245
TCGA-A7-A0DA-01	-3.07602
TCGA-GM-A2DL-01	-3.0799
TCGA-E9-A244-01	-3.48747
TCGA-E2-A15C-01	-2.59221
TCGA-BH-A0BT-01	-3.56834
TCGA-BH-A0E9-01	-2.64165
TCGA-BH-A18I-01	-2.98878
TCGA-BH-A0HI-01	-2.9038
TCGA-A2-A0CZ-01	-3.19887
TCGA-D8-A1X9-01	-2.57158
TCGA-BH-A18R-01	-2.93824
TCGA-AO-A12B-01	-2.70961
TCGA-BH-A0B3-01	-3.91755
TCGA-C8-A8HP-01	-3.01207
TCGA-AR-A1AM-01	-3.06305
TCGA-A2-A4S0-01	-1.55079
TCGA-AO-A126-01	-3.22537
TCGA-AR-A5QN-01	-2.93562
TCGA-A8-A08F-01	-2.77508
TCGA-PE-A5DE-01	-3.45996
TCGA-A8-A076-01	-2.97916
TCGA-A2-A3XZ-01	-2.81323
TCGA-AR-A256-01	-3.08485
TCGA-BH-A0DG-01	-3.08355
TCGA-C8-A26Z-01	-2.01289
TCGA-BH-A0HW-01	-1.97162
TCGA-A1-A0SD-01	-2.68311
TCGA-A2-A0CX-01	-2.90826
TCGA-AO-A03R-01	-3.6085
TCGA-PL-A8LZ-01	-3.90141
TCGA-BH-A1F8-01	-1.76854
TCGA-BH-A0BZ-01	-3.51261
TCGA-AC-A8OP-01	-2.6231
TCGA-GI-A2C9-01	-3.33615
TCGA-AO-A125-01	-2.01203
TCGA-EW-A1OZ-01	-3.16538
TCGA-BH-A0C0-01	-3.47143
TCGA-AN-A03Y-01	-3.07075
TCGA-D8-A145-01	-2.55911
TCGA-OL-A66I-01	-3.71758
TCGA-OL-A5S0-01	-4.18363
TCGA-B6-A0I5-01	-3.33566
TCGA-Z7-A8R6-01	-3.68062
TCGA-LD-A9QF-01	-3.5268
TCGA-C8-A134-01	-2.747
TCGA-AN-A0XT-01	-2.65714
TCGA-BH-A0HA-01	-3.48553
TCGA-AR-A251-01	-2.50993
TCGA-C8-A26V-01	-2.63319
TCGA-OL-A5D7-01	-3.99582
TCGA-E2-A1IU-01	-2.4526
TCGA-AN-A0XO-01	-2.88831
TCGA-AN-A0AR-01	-3.90066
TCGA-E2-A1IO-01	-2.66852
TCGA-D8-A27H-01	-3.76711
TCGA-A7-A56D-01	-4.36715
TCGA-GM-A3XL-01	-3.91476
TCGA-BH-A0DX-01	-2.80958
TCGA-A2-A4RX-01	-3.68936
TCGA-B6-A0X1-01	-2.55861
TCGA-S3-AA0Z-01	-3.45213
TCGA-BH-A1FH-01	-2.33942
TCGA-AR-A24W-01	-2.53836
TCGA-A8-A06T-01	-2.69541
TCGA-B6-A0RM-01	-2.43264
TCGA-A2-A04N-01	-2.78229
TCGA-E9-A226-01	-2.1547
TCGA-BH-A0BJ-01	-2.90158
TCGA-E2-A10C-01	-3.15085
TCGA-BH-A5IZ-01	-3.72538
TCGA-E9-A1RD-01	-2.28474
TCGA-AC-A5XU-01	-2.35817
TCGA-E2-A576-01	-3.83114
TCGA-E9-A295-01	-3.53832
TCGA-LD-A74U-01	-3.15396
TCGA-E2-A570-01	-2.86778
TCGA-E9-A1NF-01	-3.10578
TCGA-E9-A1R4-01	-2.47841
TCGA-B6-A409-01	-4.13283
TCGA-EW-A423-01	-3.04855
TCGA-OL-A6VO-01	-3.57055
TCGA-EW-A6SD-01	-2.81349
TCGA-GM-A2DH-01	-3.17707
TCGA-LL-A5YM-01	-3.67872
TCGA-BH-A0H6-01	-2.61816
TCGA-E9-A1N8-01	-3.45944
TCGA-AR-A24Z-01	-2.31069
TCGA-A7-A4SD-01	-4.19963
TCGA-AR-A0U0-01	-3.61103
TCGA-BH-A203-01	-2.88123
TCGA-E2-A1IK-01	-2.56741
TCGA-D8-A13Y-01	-1.58206
TCGA-AR-A1AX-01	-2.84762
TCGA-E9-A1N9-01	-3.18555
TCGA-C8-A1HN-01	-2.01486
TCGA-A2-A0YC-01	-2.27934
TCGA-A2-A0CL-01	-3.05176
TCGA-D8-A1JA-01	-1.50671
TCGA-D8-A1XM-01	-2.48564
TCGA-A2-A04X-01	-3.80945
TCGA-AO-A12A-01	-3.21644
TCGA-E2-A1BC-01	-2.25227
TCGA-A2-A25F-01	-2.75329
TCGA-EW-A2FV-01	-3.47024
TCGA-C8-A132-01	-2.86164
TCGA-AN-A0AT-01	-3.53759
TCGA-AC-A3QP-01	-3.63366
TCGA-E9-A1R6-01	-2.25078
TCGA-C8-A27B-01	-3.65555
TCGA-E2-A14P-01	-3.74786
TCGA-LL-A7SZ-01	-4.03241
TCGA-BH-A0BO-01	-2.68827
TCGA-BH-A0HX-01	-3.17882
TCGA-A1-A0SF-01	-3.32151
TCGA-BH-A0B9-01	-3.66608
TCGA-D8-A1JG-01	-2.47909
TCGA-D8-A1JN-01	-2.23132
TCGA-A8-A06Z-01	-1.79805
TCGA-A2-A0YD-01	-2.8681
TCGA-D8-A1JB-01	-2.32094
TCGA-JL-A3YX-01	-3.27786
TCGA-A1-A0SK-01	-2.51028
TCGA-AO-A03P-01	-2.48697
TCGA-E2-A1LA-01	-3.13109
TCGA-AN-A0FJ-01	-3.74613
TCGA-LL-A7T0-01	-3.39093
TCGA-D8-A141-01	-2.76037
TCGA-BH-A0HB-01	-3.70128
TCGA-C8-A12Z-01	-2.50556
TCGA-A8-A08S-01	-2.6372
TCGA-S3-AA10-01	-4.32466
TCGA-E9-A22G-01	-3.60682
TCGA-C8-A1HE-01	-2.19597
TCGA-E2-A2P5-01	-3.74363
TCGA-AO-A0J9-01	-3.2936
TCGA-AR-A1AK-01	-3.06252
TCGA-C8-A27A-01	-1.2285
TCGA-E9-A5UP-01	-1.9153
TCGA-A2-A0T2-01	-3.24563
TCGA-BH-A0C3-01	-2.18161
TCGA-E2-A1IG-01	-2.93138
TCGA-C8-A1HL-01	-3.08162
TCGA-BH-A208-01	-3.62055
TCGA-A2-A3KD-01	-2.58317
TCGA-A2-A0YK-01	-2.78486
TCGA-BH-A1FR-01	-1.67402
TCGA-BH-A18J-01	-3.30923
TCGA-B6-A0WY-01	-3.87362
TCGA-AR-A24M-01	-2.61958
TCGA-E9-A1NI-01	-3.22073
TCGA-A8-A093-01	-2.15639
TCGA-AC-A6NO-01	-2.89361
TCGA-A8-A09M-01	-2.25053
TCGA-EW-A1OV-01	-3.03844
TCGA-C8-A278-01	-2.755
TCGA-AR-A1AP-01	-2.70469
TCGA-E2-A1LS-01	-1.83619
TCGA-A8-A09G-01	-2.74976
TCGA-A8-A09R-01	-2.0536
TCGA-GM-A5PX-01	-3.17074
TCGA-E2-A1BD-01	-2.79958
TCGA-E9-A1R2-01	-2.31426
TCGA-AC-A62Y-01	-2.76543
TCGA-AC-A2FO-01	-2.44178
TCGA-AR-A1AY-01	-3.04252
TCGA-AR-A2LN-01	-2.64888
TCGA-D8-A27W-01	-2.36846
TCGA-OL-A66O-01	-3.97499
TCGA-BH-A0HU-01	-3.87787
TCGA-AR-A1AH-01	-3.14103
TCGA-A8-A081-01	-2.58615
TCGA-C8-A8HQ-01	-3.42286
TCGA-A2-A04Y-01	-2.76561
TCGA-GM-A2DB-01	-3.15799
TCGA-E9-A3Q9-01	-1.74798
TCGA-A8-A09I-01	-2.89459
TCGA-A8-A07L-01	-2.755
TCGA-A2-A3XV-01	-4.05653
TCGA-AR-A0TY-01	-3.26913
TCGA-LL-A6FR-01	-4.80481
TCGA-A2-A0CW-01	-3.01162
TCGA-E2-A14O-01	-3.21035
TCGA-D8-A1J9-01	-2.6135
TCGA-A2-A0CQ-01	-2.63376
TCGA-A8-A08Z-01	-2.24465
TCGA-AC-A2FE-01	-2.90486
TCGA-AO-A03N-01	-3.23305
TCGA-EW-A2FW-01	-3.00285
TCGA-AR-A2LL-01	-1.85232
TCGA-AR-A24Q-01	-3.31301
TCGA-AO-A0J3-01	-1.48245
TCGA-AR-A2LK-01	-2.37234
TCGA-A8-A08J-01	-2.59767
TCGA-A2-A0YF-01	-2.01614
TCGA-BH-A0AZ-01	-3.21796
TCGA-E9-A22B-01	-2.57726
TCGA-AC-A3W5-01	-3.36774
TCGA-BH-A0C1-01	-2.50452
TCGA-AN-A0XU-01	-3.27755
TCGA-B6-A0RQ-01	-3.08766
TCGA-D8-A1JL-01	-2.48065
TCGA-D8-A1Y0-01	-2.43136
TCGA-E9-A229-01	-2.80285
TCGA-A8-A07I-01	-2.97927
TCGA-OL-A5RU-01	-2.80951
TCGA-AR-A5QP-01	-3.11717
TCGA-D8-A1XZ-01	-2.22709
TCGA-EW-A1PC-01	-3.95788
TCGA-AO-A0J2-01	-3.57016
TCGA-E2-A1LB-01	-3.09878
TCGA-5T-A9QA-01	-2.95945
TCGA-B6-A40C-01	-3.21697
TCGA-A7-A0CH-01	-2.40553
TCGA-E2-A9RU-01	-4.01065
TCGA-A2-A0D2-01	-3.99636
TCGA-BH-A1FE-06	-2.45866
TCGA-AC-A8OR-01	-2.74293
TCGA-S3-A6ZH-01	-2.97765
TCGA-E2-A14Z-01	-3.31204
TCGA-E2-A1IF-01	-3.48955
TCGA-D8-A27G-01	-2.4648
TCGA-EW-A1PH-01	-3.92073
TCGA-E2-A14Y-01	-4.15728
TCGA-WT-AB41-01	-3.52645
TCGA-AO-A1KQ-01	-3.21216
TCGA-D8-A1JU-01	-2.63689
TCGA-BH-A0DL-01	-3.9649
TCGA-E2-A56Z-01	-2.52341
TCGA-A7-A0D9-01	-2.12354
TCGA-BH-A0DO-01	-2.4978
TCGA-A2-A259-01	-2.45032
TCGA-AN-A0XP-01	-2.64662
TCGA-BH-A202-01	-2.22586
TCGA-A2-A0YJ-01	-2.51886
TCGA-B6-A0RH-01	-3.93454
TCGA-D8-A1XD-01	-2.3006
TCGA-A2-A0T7-01	-3.1633
TCGA-AC-A2FG-01	-2.67266
TCGA-BH-AB28-01	-2.8499
TCGA-B6-A0RE-01	-3.6747
TCGA-D8-A1JP-01	-2.39738
TCGA-S3-A6ZF-01	-2.63629
TCGA-AC-A3YJ-01	-2.19471
TCGA-A2-A0YI-01	-2.28319
TCGA-AN-A04C-01	-3.59117
TCGA-B6-A0RO-01	-3.10478
TCGA-A2-A0SX-01	-3.75055
TCGA-E2-A14R-01	-3.52358
TCGA-A7-A0DB-01	-1.7195
TCGA-EW-A1OX-01	-1.89781
TCGA-A7-A26F-01	-2.24052
TCGA-AC-A2QH-01	-1.11081
TCGA-AO-A1KR-01	-4.11263
TCGA-BH-A1ES-01	-2.77153
TCGA-B6-A0IE-01	-3.58845
TCGA-EW-A1P5-01	-2.93372
TCGA-E9-A5UO-01	-2.42251
TCGA-HN-A2NL-01	-3.73745
TCGA-GM-A2DN-01	-3.16257
TCGA-C8-A12V-01	-3.44586
TCGA-EW-A1J2-01	-2.5092
TCGA-AR-A1AR-01	-2.59766
TCGA-PL-A8LV-01	-3.80255
TCGA-D8-A1JF-01	-1.75969
TCGA-AC-A23E-01	-2.32811
TCGA-BH-A0DH-01	-3.22541
TCGA-C8-A12Y-01	-3.63529
TCGA-BH-A0BG-01	-3.76611
TCGA-BH-A18H-01	-3.08374
TCGA-D8-A1JD-01	-2.65333
TCGA-E9-A228-01	-1.86198
TCGA-E9-A3HO-01	-3.48634
TCGA-A2-A0EV-01	-2.73392
TCGA-BH-A0EI-01	-2.50213
TCGA-AN-A0XW-01	-3.018
TCGA-A8-A09A-01	-2.42333
TCGA-A1-A0SG-01	-2.89522
TCGA-BH-A1F6-01	-3.18453
TCGA-E9-A249-01	-2.88919
TCGA-BH-A1F2-01	-2.27906
TCGA-A8-A096-01	-3.01909
TCGA-AR-A1AI-01	-3.08784
TCGA-AC-A3BB-01	-3.36937
TCGA-BH-A0WA-01	-3.46459
TCGA-AQ-A1H3-01	-2.08889
TCGA-BH-A0E7-01	-2.11276
TCGA-BH-A0RX-01	-3.98885
TCGA-AO-A03U-01	-3.09869
TCGA-AR-A24L-01	-1.80784
TCGA-E2-A1IJ-01	-2.97838
TCGA-E2-A150-01	-3.18915
TCGA-E2-A15H-01	-2.98965
TCGA-BH-A0E0-01	-2.7055
TCGA-A2-A0D1-01	-2.84586
TCGA-A8-A09D-01	-2.85205
TCGA-AQ-A1H2-01	-2.47514
TCGA-D8-A1JH-01	-2.48556
TCGA-GM-A3NW-01	-2.71803
TCGA-A7-A0CD-01	-2.99454
TCGA-A7-A2KD-01	-2.79497
TCGA-AO-A03L-01	-3.92685
TCGA-AR-A2LR-01	-3.51863
TCGA-E2-A14T-01	-1.3097
TCGA-AR-A24U-01	-2.07962
TCGA-BH-A28Q-01	-2.37939
TCGA-C8-A3M7-01	-2.93159
TCGA-BH-A0EE-01	-3.82848
TCGA-3C-AALK-01	-3.37481
TCGA-EW-A1OW-01	-3.48777
TCGA-E2-A108-01	-3.19365
TCGA-A2-A0D4-01	-2.52993
TCGA-E9-A1RA-01	-2.99024
TCGA-V7-A7HQ-01	-4.01728
TCGA-AR-A24X-01	-2.54215
TCGA-D8-A73X-01	-2.61373
TCGA-BH-A0W4-01	-2.57776
TCGA-BH-A1ET-01	-1.9329
TCGA-BH-A0C7-01	-2.88908
TCGA-LD-A7W5-01	-3.55947
TCGA-D8-A1XK-01	-3.34566
TCGA-A2-A0T4-01	-2.79
TCGA-AN-A0FX-01	-3.54109
TCGA-A2-A0D3-01	-2.36998
TCGA-D8-A1XS-01	-2.18613
TCGA-C8-A138-01	-3.96319
TCGA-AR-A24R-01	-2.31822
TCGA-BH-A2L8-01	-3.198
TCGA-E2-A14V-01	-3.00948
TCGA-AO-A0JE-01	-3.69185
TCGA-A8-A06O-01	-2.55011
TCGA-AO-A0J4-01	-3.64676
TCGA-EW-A1P3-01	-2.73557
TCGA-B6-A0WT-01	-2.50659
TCGA-C8-A26W-01	-3.08682
TCGA-AN-A041-01	-2.40932
TCGA-D8-A1Y3-01	-3.5177
TCGA-B6-A40B-01	-3.62594
TCGA-B6-A1KI-01	-2.75463
TCGA-A8-A090-01	-2.27371
TCGA-BH-A0B6-01	-3.45732
TCGA-A8-A09W-01	-3.24421
TCGA-AO-A03M-01	-3.23367
TCGA-E2-A1L6-01	-2.55054
TCGA-AR-A0TQ-01	-3.20834
TCGA-B6-A0RP-01	-2.64891
TCGA-AN-A0FK-01	-2.94091
TCGA-E9-A22D-01	-3.22746
TCGA-BH-A18L-01	-1.92465
TCGA-E9-A1RG-01	-3.64973
TCGA-D8-A146-01	-2.37453
TCGA-AO-A0JL-01	-3.02034
TCGA-EW-A6SB-01	-4.08054
TCGA-3C-AAAU-01	-2.30874
TCGA-GM-A2DF-01	-3.36421
TCGA-E2-A15J-01	-2.21966
TCGA-EW-A424-01	-3.08034
TCGA-A8-A07Z-01	-2.98279
TCGA-BH-A0BF-01	-3.20908
TCGA-E2-A154-01	-2.6887
TCGA-A8-A08T-01	-1.85808
TCGA-A8-A085-01	-2.85551
TCGA-EW-A1P4-01	-4.07592
TCGA-EW-A1J1-01	-2.04312
TCGA-A8-A084-01	-2.84592
TCGA-E9-A1R7-01	-1.89479
TCGA-AO-A0JA-01	-2.60485
TCGA-A2-A1G4-01	-1.6118
TCGA-C8-A12K-01	-3.22279
TCGA-A2-A0CK-01	-3.08919
TCGA-A7-A4SE-01	-4.00004
TCGA-C8-A274-01	-2.28868
TCGA-BH-A0B0-01	-3.30315
TCGA-BH-A1EY-01	-2.20336
TCGA-C8-A12O-01	-2.65649
TCGA-BH-A42U-01	-4.22788
TCGA-AQ-A04H-01	-2.27256
TCGA-A7-A425-01	-3.44651
TCGA-AN-A049-01	-3.28909
TCGA-A8-A06Y-01	-2.32344
TCGA-AR-A2LE-01	-2.04828
TCGA-AC-A23G-01	-3.63329
TCGA-A7-A5ZV-01	-2.92262
TCGA-BH-A0BL-01	-3.13157
TCGA-EW-A1PA-01	-2.37787
TCGA-E9-A1RC-01	-1.86011
TCGA-A2-A1FV-01	-0.492058
TCGA-BH-A0AU-01	-1.92628
TCGA-LL-A73Y-01	-3.41142
TCGA-D8-A1JC-01	-2.2519
TCGA-E2-A1B4-01	-3.09282
TCGA-A2-A0EW-01	-2.65357
TCGA-E9-A1NG-01	-2.86633
TCGA-AR-A1AL-01	-2.39579
TCGA-LD-A7W6-01	-3.46642
TCGA-JL-A3YW-01	-3.23128
TCGA-A2-A1FX-01	-2.59707
TCGA-BH-A1FJ-01	-2.84309
TCGA-A2-A0EX-01	-2.97915
TCGA-A2-A0CM-01	-3.96885
TCGA-GM-A2DA-01	-2.96142
TCGA-B6-A0X7-01	-2.57934
TCGA-AR-A2LQ-01	-2.75419
TCGA-W8-A86G-01	-3.12593
TCGA-BH-A0HO-01	-2.08506
TCGA-BH-A1FU-01	-3.56569
TCGA-A8-A091-01	-1.10295
TCGA-E9-A1N3-01	-1.10678
TCGA-AR-A0U2-01	-2.06328
TCGA-BH-A0W7-01	-3.61203
TCGA-E9-A1R5-01	-1.8393
TCGA-3C-AALI-01	-3.15742
TCGA-E9-A1RI-01	-2.30226
TCGA-A2-A0ER-01	-2.20985
TCGA-3C-AALJ-01	-3.14155
TCGA-E9-A6HE-01	-3.74532
TCGA-A7-A5ZX-01	-3.13407
TCGA-BH-A201-01	-3.08754
TCGA-A2-A04W-01	-2.79844
TCGA-D8-A73W-01	-2.44569
TCGA-A7-A3IY-01	-3.33067
TCGA-OL-A6VR-01	-2.87958
TCGA-EW-A2FR-01	-3.29307
TCGA-BH-A0HP-01	-2.85429
TCGA-AR-A0TP-01	-2.5826
TCGA-C8-A12X-01	-3.20053
TCGA-D8-A1XJ-01	-2.87582
TCGA-AR-A0TZ-01	-2.28495
TCGA-EW-A1OY-01	-2.80868
TCGA-GM-A2DC-01	-1.38212
TCGA-BH-A18N-01	-2.37421
TCGA-E9-A1ND-01	-3.45582
TCGA-D8-A1XR-01	-2.33262
TCGA-A2-A0ES-01	-2.76287
TCGA-C8-A1HO-01	-1.93364
TCGA-LL-A9Q3-01	-2.98926
TCGA-A7-A3J1-01	-2.42467
TCGA-AC-A5EH-01	-3.26151
TCGA-E2-A15O-01	-2.90674
TCGA-AC-A3W6-01	-3.43649
TCGA-AN-A0FD-01	-3.56053
TCGA-BH-A0BM-01	-2.91408
TCGA-E9-A22H-01	-2.31335
TCGA-EW-A1IY-01	-2.09785
TCGA-E9-A3X8-01	-4.33297
TCGA-AR-A24K-01	-2.05039
TCGA-S3-AA11-01	-2.83274
TCGA-EW-A6SA-01	-2.50144
TCGA-A2-A0CP-01	-3.29117
TCGA-B6-A0RU-01	-3.43713
TCGA-B6-A0RS-01	-3.37636
TCGA-A1-A0SN-01	-3.58015
TCGA-EW-A1IZ-01	-3.27418
TCGA-A7-A13F-01	-2.85156
TCGA-D8-A1JT-01	-1.40077
TCGA-D8-A1JM-01	-3.06587
TCGA-BH-A0BQ-01	-3.48023
TCGA-BH-A0EA-01	-2.44917
TCGA-BH-A0BA-01	-2.72722
TCGA-EW-A6SC-01	-2.83475
TCGA-OL-A5DA-01	-2.71813
TCGA-A2-A0T1-01	-3.19667
TCGA-AO-A0JC-01	-2.71502
TCGA-EW-A2FS-01	-2.94213
TCGA-A8-A09K-01	-1.53574
TCGA-E2-A107-01	-3.28024
TCGA-A7-A6VY-01	-3.9783
TCGA-E2-A14Q-01	-3.12017
TCGA-E2-A15A-06	-2.4363
TCGA-B6-A0IB-01	-2.67889
TCGA-A8-A06Q-01	-2.0753
TCGA-GM-A2DK-01	-3.04914
TCGA-5L-AAT0-01	-3.18603
TCGA-A7-A4SC-01	-2.10633
TCGA-A2-A0CR-01	-4.30531
TCGA-AC-A2QJ-01	-4.39328
TCGA-AN-A03X-01	-2.68437
TCGA-AN-A0FL-01	-3.40274
TCGA-BH-A18P-01	-2.80074
TCGA-AC-A3YI-01	-3.31925
TCGA-A2-A0SY-01	-2.44984
TCGA-GM-A2DM-01	-1.9573
TCGA-D8-A1XF-01	-1.75611
TCGA-BH-A1FM-01	-1.71662
TCGA-BH-A0HN-01	-1.86746
TCGA-AN-A0FV-01	-2.14777
TCGA-B6-A0X0-01	-3.25708
TCGA-AO-A03T-01	-2.96059
TCGA-S3-AA15-01	-3.55809
TCGA-AO-A12D-01	-2.80358
TCGA-BH-A0DK-01	-3.72673
TCGA-AO-A124-01	-3.38161
TCGA-E2-A15R-01	-0.969728
TCGA-D8-A1Y1-01	-2.50704
TCGA-A2-A04T-01	-2.82852
TCGA-UU-A93S-01	-3.12515
TCGA-A2-A0T6-01	-2.37766
TCGA-E2-A10F-01	-2.64903
TCGA-EW-A1IW-01	-2.70193
TCGA-E9-A1NC-01	-4.31798
TCGA-AC-A3TM-01	-4.28715
TCGA-E9-A1QZ-01	-2.29421
TCGA-A8-A09C-01	-2.66397
TCGA-D8-A73U-01	-2.70797
TCGA-A8-A07E-01	-3.36024
TCGA-AC-A3TN-01	-3.46054
TCGA-AO-A0JF-01	-2.95899
TCGA-E2-A153-01	-2.72335
TCGA-BH-A0B5-01	-2.94669
TCGA-A8-A07W-01	-2.601
TCGA-BH-A0B8-01	-3.05323
TCGA-BH-A0B1-01	-3.19737
TCGA-BH-A1FN-01	-2.03038
TCGA-D8-A147-01	-3.47148
TCGA-PL-A8LX-01	-1.82269
TCGA-E9-A1N4-01	-2.39615
TCGA-BH-A18F-01	-3.04963
TCGA-D8-A27F-01	-3.6246
TCGA-A8-A0AB-01	-1.80117
TCGA-AR-A0TS-01	-3.1555
TCGA-BH-A0H9-01	-2.82931
TCGA-A8-A07U-01	-3.31894
TCGA-E2-A14X-01	-3.32357
TCGA-C8-A131-01	-3.75296
TCGA-BH-A1FL-01	-2.58168
TCGA-C8-A12W-01	-3.21289
TCGA-AC-A7VC-01	-4.03678
TCGA-AO-A12E-01	-2.74896
TCGA-E2-A1LI-01	-3.39794
TCGA-AC-A2BM-01	-1.79111
TCGA-A8-A07R-01	-3.55154
TCGA-BH-A0AW-01	-3.36331
TCGA-A7-A426-01	-3.67384
TCGA-BH-A6R8-01	-2.96476
TCGA-AC-A8OS-01	-2.68345
TCGA-A2-A04Q-01	-3.50942
TCGA-A7-A26H-01	-1.83727
TCGA-A7-A4SF-01	-2.87036
TCGA-D8-A27M-01	-2.94297
TCGA-E9-A1NE-01	-2.57352
TCGA-E2-A573-01	-3.92709
TCGA-C8-A1HI-01	-2.66291
TCGA-A7-A6VW-01	-4.86994
TCGA-BH-A0B7-01	-2.98301
TCGA-A8-A0A6-01	-2.57139
TCGA-AO-A0J5-01	-2.63595
TCGA-AO-A12H-01	-2.07497
TCGA-E2-A15G-01	-2.23643
TCGA-GM-A5PV-01	-3.12823
TCGA-E9-A24A-01	-2.04082
TCGA-AR-A2LM-01	-2.26186
TCGA-E2-A1II-01	-3.46962
TCGA-D8-A27P-01	-2.59751
TCGA-EW-A1J3-01	-1.94678
TCGA-B6-A0I8-01	-2.24395
TCGA-AO-A1KS-01	-1.80446
TCGA-A2-A4S2-01	-3.10918
TCGA-BH-A6R9-01	-3.58113
TCGA-BH-A8FZ-01	-3.00717
TCGA-AC-A2FK-01	-2.64048
TCGA-A2-A0T0-01	-3.1925
TCGA-A8-A07S-01	-2.72317
TCGA-GM-A2DI-01	-2.94128
TCGA-E2-A106-01	-2.57398
TCGA-BH-A0E6-01	-3.79159
TCGA-AO-A03V-01	-2.57737
TCGA-AC-A2BK-01	-3.3379
TCGA-AR-A254-01	-2.56504
TCGA-AO-A129-01	-3.89401
TCGA-BH-A8FY-01	-2.92986
TCGA-D8-A143-01	-3.31777
TCGA-AC-A3W7-01	-3.44029
TCGA-A8-A06X-01	-2.90501
TCGA-AR-A255-01	-3.13147
TCGA-BH-A0DZ-01	-3.49334
TCGA-C8-A12T-01	-3.47153
TCGA-AO-A12G-01	-2.61278
TCGA-E2-A15L-01	-2.62469
TCGA-AN-A0FF-01	-2.64336
TCGA-A2-A3XX-01	-3.34637
TCGA-EW-A1P8-01	-3.45856
TCGA-A8-A097-01	-2.7437
TCGA-BH-A0E1-01	-3.09621
TCGA-BH-A0HF-01	-3.86467
TCGA-E9-A5FL-01	-4.48663
TCGA-AR-A1AW-01	-2.4307
TCGA-AQ-A0Y5-01	-1.91508
TCGA-OK-A5Q2-01	-3.51418
TCGA-E2-A1B6-01	-3.75266
TCGA-A8-A07P-01	-2.30387
TCGA-AR-A0TW-01	-2.35067
TCGA-E9-A1N6-01	-2.84759
TCGA-BH-A1EU-01	-1.78467
TCGA-A2-A0EQ-01	-3.0691
TCGA-A8-A08C-01	-1.96142
TCGA-OL-A5RW-01	-4.58083
TCGA-B6-A0WS-01	-2.98263
TCGA-BH-A42V-01	-3.35588
TCGA-A2-A0YL-01	-3.06522
TCGA-B6-A402-01	-3.33753
TCGA-A7-A0CJ-01	-3.25666
TCGA-E9-A22E-01	-3.31541
TCGA-A2-A3Y0-01	-4.52451
TCGA-AN-A0FZ-01	-2.52678
TCGA-BH-A0DQ-01	-3.485
TCGA-A8-A07J-01	-2.26076
TCGA-E9-A54X-01	-1.8847
TCGA-B6-A1KC-01	-1.4277
TCGA-BH-A18K-01	-3.04218
TCGA-A2-A0EU-01	-3.35514
TCGA-B6-A0IH-01	-2.5762
TCGA-A2-A0EY-01	-2.20297
TCGA-AO-A0JJ-01	-2.90462
TCGA-C8-A26X-01	-3.0436
TCGA-BH-A18Q-01	-3.54844
TCGA-A8-A092-01	-3.22732
TCGA-S3-AA12-01	-2.56362
TCGA-BH-A1EO-01	-1.93512
TCGA-A2-A4RW-01	-2.59386
TCGA-D8-A142-01	-3.07285
TCGA-A2-A0YE-01	-2.99677
TCGA-A2-A04P-01	-3.69894
TCGA-A2-A0CY-01	-3.903
TCGA-E9-A1RB-01	-3.03881
TCGA-A7-A5ZW-01	-3.24375
TCGA-E2-A1IN-01	-2.84706
TCGA-EW-A6S9-01	-3.05701
TCGA-AR-A5QM-01	-3.11697
TCGA-AO-A0J7-01	-3.29538
TCGA-A2-A3KC-01	-2.97345
TCGA-E2-A15D-01	-2.04748
TCGA-A2-A0YG-01	-2.43078
TCGA-AO-A03O-01	-2.94746
TCGA-OL-A66N-01	-3.4248
TCGA-B6-A0I2-01	-3.55692
TCGA-E2-A572-01	-3.69341
TCGA-EW-A1PG-01	-2.92138
TCGA-A7-A26G-01	-3.002
TCGA-B6-A0WV-01	-2.74799
TCGA-AO-A0JM-01	-3.84432
TCGA-D8-A1X7-01	-1.74037
TCGA-C8-A3M8-01	-2.46201
TCGA-LL-A5YN-01	-4.10174
TCGA-B6-A0RG-01	-3.38426
TCGA-AC-A3OD-01	-1.4572
TCGA-A8-A08O-01	-2.5958
TCGA-A8-A07B-01	-2.8361
TCGA-A8-A08L-01	-2.60983
TCGA-E2-A15I-01	-1.46887
TCGA-BH-A0HQ-01	-2.74085
TCGA-AR-A24V-01	-2.79985
TCGA-EW-A1P1-01	-3.16759
TCGA-EW-A3E8-01	-3.07049
TCGA-A8-A07O-01	-2.94197
TCGA-AN-A04D-01	-3.24598
TCGA-E9-A2JT-01	-2.55837
TCGA-A2-A4S3-01	-3.06599
TCGA-AN-A0AK-01	-2.65112
TCGA-AO-A1KO-01	-2.12494
TCGA-BH-A1ES-06	-1.58156
TCGA-AR-A1AV-01	-1.98403
TCGA-A2-A0D0-01	-4.33195
TCGA-A7-A13G-01	-1.19787
TCGA-AC-A2QI-01	-2.61799
TCGA-AC-A2FM-01	-2.21613
TCGA-B6-A0X5-01	-3.00787
TCGA-C8-A12L-01	-3.27354
TCGA-AN-A0AS-01	-2.66749
TCGA-A8-A0A2-01	-1.9181
TCGA-LQ-A4E4-01	-2.58951
TCGA-A1-A0SI-01	-3.49276
TCGA-BH-A5J0-01	-3.69329
TCGA-D8-A1Y2-01	-2.89624
TCGA-A7-A3RF-01	-1.57853
TCGA-A2-A0T5-01	-3.12653
TCGA-BH-A1F5-01	-1.40699
TCGA-LD-A66U-01	-3.98481
TCGA-E9-A3QA-01	-3.62715
TCGA-AO-A12F-01	-3.01189
TCGA-A2-A25E-01	-2.50933
TCGA-A8-A0A4-01	-3.12168
TCGA-EW-A1J6-01	-2.37059
TCGA-C8-A8HR-01	-3.69137
TCGA-BH-A0BV-01	-2.85177
TCGA-D8-A27T-01	-2.92023
TCGA-E9-A1RE-01	-2.15207
TCGA-A2-A0T3-01	-3.05935
TCGA-E2-A15E-01	-2.88832
TCGA-E9-A1N5-01	-2.64878
TCGA-B6-A0RV-01	-2.85512
TCGA-E2-A15P-01	-2.51057
TCGA-AC-A3EH-01	-2.73902
TCGA-BH-A1FB-01	-2.51385
TCGA-A8-A07C-01	-2.77858
TCGA-E9-A5FK-01	-4.05766
TCGA-A2-A0CO-01	-3.04907
TCGA-A8-A0A9-01	-3.25186
TCGA-C8-A1HF-01	-3.56841
TCGA-AQ-A54O-01	-2.63556
TCGA-S3-AA17-01	-2.69557
TCGA-MS-A51U-01	-3.04854
TCGA-AC-A62V-01	-3.72282
TCGA-GI-A2C8-01	-1.55494
TCGA-BH-A18S-01	-1.94761
TCGA-EW-A1P7-01	-3.44601
TCGA-A8-A08P-01	-3.18046
TCGA-A8-A095-01	-2.96035
TCGA-EW-A1P0-01	-1.7814
TCGA-A2-A4S1-01	-3.02012
TCGA-AR-A0U3-01	-2.55264
TCGA-BH-A0EB-01	-2.77476
TCGA-E9-A54Y-01	-3.70619
TCGA-D8-A1XU-01	-2.53756
TCGA-OL-A66J-01	-3.04553
TCGA-EW-A1PD-01	-3.02898
TCGA-BH-A0BC-01	-3.41929
TCGA-AC-A23H-01	-2.6116
TCGA-D8-A1XC-01	-1.02066
TCGA-AN-A0XV-01	-2.94125
TCGA-A8-A08G-01	-2.00361
TCGA-A2-A1FW-01	-1.86971
TCGA-LL-A5YO-01	-4.0874
TCGA-E9-A1RF-01	-2.73728
TCGA-XX-A899-01	-2.80147
TCGA-E2-A15K-06	-2.19558
TCGA-AO-A0JI-01	-2.10554
TCGA-AN-A0AM-01	-3.48763
TCGA-AO-A128-01	-3.14982
TCGA-C8-A12N-01	-2.85326
TCGA-A7-A6VX-01	-2.85709
TCGA-C8-A133-01	-1.88386
TCGA-A2-A0CS-01	-3.04473
TCGA-E2-A15K-01	-3.30354
TCGA-A8-A083-01	-2.70681
TCGA-XX-A89A-01	-2.90125
TCGA-BH-A28O-01	-3.12632
TCGA-B6-A0IC-01	-1.86196
TCGA-B6-A401-01	-3.39578
TCGA-AN-A0XS-01	-3.09829
TCGA-A7-A0CG-01	-2.63417
TCGA-A1-A0SM-01	-2.57311
TCGA-D8-A27R-01	-2.88143
TCGA-GM-A2DD-01	-3.48669
TCGA-LL-A740-01	-3.27616
TCGA-AR-A24T-01	-2.09881
TCGA-BH-A0H0-01	-2.21387
TCGA-A8-A09T-01	-2.72603
TCGA-B6-A0WW-01	-2.83851
TCGA-OL-A66L-01	-4.07613
TCGA-A8-A0A7-01	-3.07682
TCGA-A7-A4SA-01	-3.13087
TCGA-A2-A0EN-01	-2.67558
TCGA-B6-A0IO-01	-2.51468
TCGA-AC-A8OQ-01	-3.68122
TCGA-D8-A27E-01	-1.45564
TCGA-BH-A8G0-01	-2.86196
TCGA-A2-A3XW-01	-4.69093
TCGA-BH-A0DP-01	-2.50926
TCGA-PE-A5DD-01	-3.58974
TCGA-OL-A66K-01	-2.47587
TCGA-BH-A1FG-01	-2.24486
TCGA-A2-A25D-01	-3.11396
TCGA-S3-AA14-01	-2.92918
TCGA-LL-A440-01	-2.72203
TCGA-A2-A0SW-01	-2.98502
TCGA-D8-A1XW-01	-2.05911
TCGA-B6-A2IU-01	-2.81367
TCGA-GM-A2DO-01	-2.79106
TCGA-B6-A0IA-01	-3.1641
TCGA-C8-A26Y-01	-2.27478
TCGA-AN-A0G0-01	-2.88124
TCGA-AO-A0JG-01	-2.22306
TCGA-E2-A1LH-01	-3.86386
TCGA-AN-A0FY-01	-3.06556
TCGA-E2-A1L9-01	-2.53625
TCGA-BH-A0W5-01	-2.85714
TCGA-AQ-A54N-01	-3.49416
TCGA-GM-A3NY-01	-2.99667
TCGA-A8-A09E-01	-3.06386
TCGA-AR-A0TX-01	-2.53107
TCGA-AQ-A04J-01	-3.16831
TCGA-AR-A2LJ-01	-3.40685
TCGA-OL-A66H-01	-2.80337
TCGA-AC-A23C-01	-1.97265
TCGA-D8-A1XQ-01	-3.30965
TCGA-E2-A156-01	-1.40546
TCGA-AC-A6IV-01	-2.75765
TCGA-E2-A15E-06	-2.30503
TCGA-D8-A1X6-01	-2.20293
TCGA-A8-A0AD-01	-1.62798
TCGA-A8-A07G-01	-2.68545
TCGA-C8-A130-01	-3.43357
TCGA-AN-A046-01	-3.00973
TCGA-E2-A1AZ-01	-2.80471
TCGA-B6-A400-01	-4.20238
TCGA-Z7-A8R5-01	-3.98081
TCGA-E2-A155-01	-1.7074
TCGA-E2-A109-01	-2.92466
TCGA-BH-A1EN-01	-2.30385
TCGA-AR-A1AQ-01	-3.44992
TCGA-E2-A574-01	-4.8687
TCGA-A2-A1G0-01	-1.53359
TCGA-AC-A4ZE-01	-2.69347
TCGA-AR-A24O-01	-2.61852
TCGA-BH-A0AV-01	-2.98616
TCGA-C8-A137-01	-3.02807
TCGA-B6-A0RL-01	-1.89843
TCGA-OL-A5RV-01	-2.72169
TCGA-B6-A0IM-01	-1.85902
TCGA-B6-A0IK-01	-3.4547
TCGA-B6-A0WX-01	-3.59565
TCGA-AR-A24H-01	-2.19155
TCGA-B6-A0IQ-01	-3.84368
TCGA-D8-A27N-01	-3.21967
TCGA-C8-A275-01	-3.36971
TCGA-B6-A0IG-01	-3.19999
TCGA-E9-A243-01	-2.98738
TCGA-D8-A1JE-01	-2.45643
TCGA-E2-A1LE-01	-3.47864
TCGA-AC-A6IX-01	-2.73782
TCGA-A8-A09Q-01	-2.39368
TCGA-AN-A0AL-01	-3.85777
TCGA-A2-A4RY-01	-3.03848
TCGA-AR-A5QQ-01	-4.85324
TCGA-D8-A140-01	-2.39352
TCGA-A2-A0YH-01	-2.67073
TCGA-B6-A3ZX-01	-3.20165
TCGA-A1-A0SE-01	-2.79276
TCGA-AR-A1AN-01	-2.73035
TCGA-A8-A08R-01	-3.51978
TCGA-OL-A5RX-01	-3.13677
TCGA-AR-A2LO-01	-3.02321
TCGA-BH-A0BD-01	-2.94046
TCGA-AR-A24N-01	-2.48334
TCGA-AR-A2LH-01	-3.87291
TCGA-AR-A1AO-01	-3.07821
TCGA-BH-A1EW-01	-2.5385
TCGA-BH-A0W3-01	-2.48803
TCGA-EW-A1PF-01	-2.40438
TCGA-S3-A6ZG-01	-2.75063
TCGA-E9-A22A-01	-3.24472
TCGA-A2-A0YT-01	-2.88623
TCGA-B6-A0IN-01	-2.7862
TCGA-C8-A1HJ-01	-3.26862
TCGA-AQ-A7U7-01	-3.12528
TCGA-D8-A1JI-01	-1.8528
TCGA-GM-A2D9-01	-3.14667
TCGA-A8-A06R-01	-2.85858
TCGA-AR-A1AT-01	-2.89961
TCGA-AO-A1KP-01	-1.87931
TCGA-AN-A0AJ-01	-3.41373
TCGA-A8-A07F-01	-2.3126
TCGA-GM-A3XG-01	-3.6607
TCGA-AR-A0TV-01	-2.41176
TCGA-A2-A3XY-01	-3.92617
TCGA-BH-A0DD-01	-2.68158
TCGA-A2-A1FZ-01	-2.43164
TCGA-D8-A13Z-01	-3.90917
TCGA-A2-A25C-01	-3.02933
TCGA-AN-A0XR-01	-3.16542
TCGA-B6-A0RN-01	-2.66283
TCGA-AC-A2FB-01	-2.42975
TCGA-AC-A7VB-01	-2.66214
TCGA-A2-A0YM-01	-3.99114
TCGA-OL-A5D8-01	-2.1132
TCGA-D8-A1XL-01	-3.57101
TCGA-AR-A252-01	-1.91449
TCGA-BH-A18G-01	-3.7928
TCGA-OL-A5D6-01	-3.18357
TCGA-A8-A086-01	-2.60032

## Sheet: Tamoxifen
TCGA-D8-A1XO-01	3.59121
TCGA-AN-A0FN-01	3.56235
TCGA-AC-A62X-01	3.44422
TCGA-E2-A14U-01	3.70408
TCGA-E9-A1R3-01	3.52141
TCGA-BH-A18M-01	3.58039
TCGA-E2-A15T-01	4.00064
TCGA-AR-A0TU-01	3.08017
TCGA-EW-A1IX-01	3.65491
TCGA-B6-A408-01	3.69555
TCGA-E2-A1IE-01	3.90731
TCGA-E2-A10E-01	3.85918
TCGA-EW-A3U0-01	3.19236
TCGA-BH-A0H5-01	3.21888
TCGA-E2-A14W-01	4.06307
TCGA-AQ-A04L-01	4.22305
TCGA-BH-A1FD-01	3.74617
TCGA-AR-A0TR-01	3.80377
TCGA-A7-A0CE-01	3.53314
TCGA-AO-A0J8-01	3.90355
TCGA-BH-A1F0-01	3.32518
TCGA-A2-A0SU-01	3.73989
TCGA-AC-A2FF-01	3.45156
TCGA-LL-A6FP-01	4.46986
TCGA-E2-A15S-01	3.93608
TCGA-E2-A14N-01	3.40798
TCGA-D8-A1JK-01	3.59423
TCGA-D8-A3Z6-01	3.92974
TCGA-A8-A06U-01	3.78039
TCGA-A7-A13E-01	3.99279
TCGA-UL-AAZ6-01	4.21404
TCGA-B6-A0I9-01	3.69249
TCGA-A8-A099-01	3.85761
TCGA-OL-A5RY-01	3.38914
TCGA-E9-A1NA-01	3.57481
TCGA-D8-A1XV-01	4.25317
TCGA-BH-A18T-01	3.42944
TCGA-B6-A0RT-01	2.98751
TCGA-A1-A0SJ-01	3.85471
TCGA-E9-A247-01	4.06041
TCGA-C8-A12P-01	3.86757
TCGA-A8-A09X-01	3.38917
TCGA-BH-A1FC-01	3.76698
TCGA-A8-A082-01	3.92633
TCGA-C8-A12M-01	3.76515
TCGA-BH-A1EV-01	3.78284
TCGA-C8-A135-01	3.71456
TCGA-WT-AB44-01	4.44409
TCGA-A7-A3J0-01	3.78472
TCGA-E9-A1R0-01	3.72768
TCGA-B6-A0IJ-01	3.59266
TCGA-LL-A441-01	3.32286
TCGA-A2-A3XT-01	3.43408
TCGA-D8-A27I-01	3.61094
TCGA-A8-A094-01	3.57106
TCGA-A2-A1G6-01	3.5465
TCGA-BH-A0GY-01	3.62682
TCGA-E2-A1B0-01	3.2983
TCGA-E9-A1RH-01	3.8459
TCGA-C8-A1HG-01	3.52575
TCGA-A1-A0SB-01	3.71142
TCGA-A7-A0DC-01	4.12675
TCGA-A7-A3IZ-01	3.99149
TCGA-LL-A5YL-01	4.03036
TCGA-BH-A0DI-01	3.63341
TCGA-E2-A1B1-01	3.51879
TCGA-BH-A0H3-01	3.55381
TCGA-D8-A27K-01	3.48327
TCGA-A2-A04U-01	3.94861
TCGA-AO-A0J6-01	3.25429
TCGA-BH-A0E2-01	3.52573
TCGA-E2-A1L8-01	4.00623
TCGA-OL-A5RZ-01	3.76932
TCGA-B6-A1KF-01	3.90766
TCGA-E2-A1L7-01	3.5281
TCGA-B6-A0I6-01	3.55595
TCGA-AN-A0XL-01	3.82281
TCGA-A8-A08B-01	3.51023
TCGA-AC-A6IX-06	3.59877
TCGA-E2-A2P6-01	4.22855
TCGA-E2-A3DX-01	3.60559
TCGA-E2-A159-01	3.40935
TCGA-E9-A1NH-01	3.71204
TCGA-A8-A0A1-01	3.57812
TCGA-D8-A4Z1-01	3.5514
TCGA-AR-A1AS-01	3.83181
TCGA-AR-A24P-01	3.7565
TCGA-A8-A09Z-01	3.71196
TCGA-BH-A0HL-01	4.16337
TCGA-A8-A08X-01	3.86703
TCGA-A8-A09V-01	3.85444
TCGA-D8-A1XT-01	3.28856
TCGA-GM-A4E0-01	3.85223
TCGA-AN-A0XN-01	3.67077
TCGA-A2-A04V-01	4.02297
TCGA-A7-A26I-01	3.72583
TCGA-A2-A3XS-01	3.79751
TCGA-BH-A0BP-01	3.85954
TCGA-AC-A3QQ-01	4.39091
TCGA-AO-A12C-01	3.98817
TCGA-E2-A1IH-01	3.72264
TCGA-BH-A0DS-01	3.95804
TCGA-AN-A0FS-01	3.80772
TCGA-E2-A15F-01	3.8703
TCGA-BH-A0H7-01	4.02779
TCGA-A8-A079-01	4.09875
TCGA-D8-A1XY-01	3.76
TCGA-AO-A0JD-01	3.38925
TCGA-B6-A0WZ-01	4.11646
TCGA-D8-A1XB-01	3.57864
TCGA-BH-A0BS-01	3.88742
TCGA-BH-A1EX-01	3.68429
TCGA-D8-A1X8-01	3.63494
TCGA-HN-A2OB-01	3.70601
TCGA-B6-A0I1-01	3.81063
TCGA-OL-A97C-01	3.56447
TCGA-E2-A1LK-01	3.80263
TCGA-D8-A1J8-01	3.7129
TCGA-A8-A06P-01	3.82107
TCGA-D8-A3Z5-01	3.97861
TCGA-E2-A152-01	3.85043
TCGA-BH-A0DT-01	3.4976
TCGA-A1-A0SQ-01	4.12092
TCGA-BH-A1FE-01	3.30643
TCGA-BH-A0BR-01	3.50001
TCGA-BH-A18V-01	3.55794
TCGA-GM-A3XN-01	3.77437
TCGA-A8-A09B-01	3.7075
TCGA-PL-A8LY-01	3.63395
TCGA-E2-A10A-01	3.30685
TCGA-A7-A6VV-01	3.62111
TCGA-BH-A0BW-01	3.3193
TCGA-AN-A04A-01	3.75432
TCGA-OL-A66P-01	3.94304
TCGA-A2-A0SV-01	3.63582
TCGA-E2-A1LG-01	4.04607
TCGA-E2-A1LL-01	3.5147
TCGA-A2-A0ET-01	3.38905
TCGA-B6-A0RI-01	3.62171
TCGA-BH-A0GZ-01	4.12354
TCGA-A2-A25A-01	3.5656
TCGA-A8-A06N-01	4.07804
TCGA-EW-A1J5-01	3.68053
TCGA-D8-A27V-01	3.86438
TCGA-A2-A0ST-01	3.28535
TCGA-A2-A0CT-01	3.88687
TCGA-AR-A0TT-01	3.30225
TCGA-LL-A8F5-01	3.91373
TCGA-AN-A0FW-01	3.97359
TCGA-BH-A18U-01	3.78156
TCGA-E9-A248-01	3.54693
TCGA-A2-A0CU-01	4.01542
TCGA-BH-A0HY-01	4.04205
TCGA-D8-A1XG-01	3.8517
TCGA-BH-A204-01	3.81314
TCGA-AR-A0U4-01	3.33004
TCGA-E2-A14S-01	3.70432
TCGA-D8-A1JS-01	4.16548
TCGA-C8-A1HK-01	3.76803
TCGA-AR-A250-01	3.691
TCGA-EW-A1PB-01	3.13115
TCGA-AC-A2B8-01	3.57724
TCGA-A8-A08I-01	3.35554
TCGA-BH-A18V-06	3.30757
TCGA-LL-A6FQ-01	3.96048
TCGA-A1-A0SP-01	3.56114
TCGA-LL-A442-01	3.73882
TCGA-A2-A3XU-01	3.93505
TCGA-A2-A25B-01	3.79003
TCGA-AO-A1KT-01	3.82515
TCGA-B6-A1KN-01	3.57752
TCGA-LL-A5YP-01	3.46939
TCGA-AR-A1AU-01	3.80493
TCGA-A7-A26J-01	3.67714
TCGA-E9-A245-01	3.81141
TCGA-BH-A42T-01	3.80446
TCGA-A2-A0EM-01	3.84944
TCGA-PE-A5DC-01	3.91208
TCGA-A7-A13D-01	4.00504
TCGA-BH-A0HK-01	4.22152
TCGA-B6-A0IP-01	3.81646
TCGA-D8-A1XA-01	3.8758
TCGA-D8-A1X5-01	3.98524
TCGA-D8-A27L-01	3.30521
TCGA-D8-A1JJ-01	3.54788
TCGA-A2-A1G1-01	3.25061
TCGA-E2-A1IL-01	3.76972
TCGA-A7-A4SB-01	4.2322
TCGA-A7-A13H-01	3.66342
TCGA-BH-A0AY-01	3.71579
TCGA-A8-A075-01	3.59431
TCGA-E2-A158-01	3.89321
TCGA-BH-A0B4-01	3.87403
TCGA-BH-A0DV-01	3.62818
TCGA-A2-A0EP-01	3.39434
TCGA-EW-A1PE-01	3.61545
TCGA-LL-A73Z-01	3.67521
TCGA-AR-A1AJ-01	3.00119
TCGA-E9-A227-01	3.67863
TCGA-AO-A0JB-01	4.53112
TCGA-A8-A09N-01	3.70366
TCGA-E2-A15A-01	3.58884
TCGA-A8-A08A-01	3.74114
TCGA-AC-A5XS-01	3.69182
TCGA-BH-A209-01	3.43485
TCGA-AR-A24S-01	3.21891
TCGA-A7-A26E-01	3.85129
TCGA-EW-A1P6-01	3.77156
TCGA-C8-A1HM-01	3.36159
TCGA-OL-A6VQ-01	3.83121
TCGA-E2-A1B5-01	3.68579
TCGA-A2-A0CV-01	3.57077
TCGA-5L-AAT1-01	3.50866
TCGA-B6-A0X4-01	3.92259
TCGA-E2-A105-01	3.8406
TCGA-AC-A3HN-01	3.63399
TCGA-A1-A0SO-01	3.7748
TCGA-E2-A10B-01	3.62109
TCGA-A1-A0SH-01	3.73549
TCGA-E9-A2JS-01	4.01245
TCGA-A2-A04R-01	3.99613
TCGA-C8-A12Q-01	3.48657
TCGA-AN-A0FT-01	4.13583
TCGA-4H-AAAK-01	3.65013
TCGA-E2-A15M-01	3.38005
TCGA-A8-A08H-01	3.18452
TCGA-C8-A273-01	3.88639
TCGA-BH-A0DE-01	3.88136
TCGA-C8-A12U-01	3.73263
TCGA-A2-A0EO-01	3.85341
TCGA-AC-A6IW-01	3.24521
TCGA-LL-A50Y-01	4.00486
TCGA-A7-A0DA-01	3.94683
TCGA-GM-A2DL-01	3.84066
TCGA-E9-A244-01	3.96143
TCGA-E2-A15C-01	3.89081
TCGA-BH-A0BT-01	3.75373
TCGA-BH-A0E9-01	3.72831
TCGA-BH-A18I-01	3.60772
TCGA-BH-A0HI-01	3.90083
TCGA-A2-A0CZ-01	3.8208
TCGA-D8-A1X9-01	3.78398
TCGA-BH-A18R-01	3.65261
TCGA-AO-A12B-01	4.00357
TCGA-BH-A0B3-01	3.71289
TCGA-C8-A8HP-01	4.01551
TCGA-AR-A1AM-01	3.75957
TCGA-A2-A4S0-01	3.82292
TCGA-AO-A126-01	3.95081
TCGA-AR-A5QN-01	3.89179
TCGA-A8-A08F-01	3.7189
TCGA-PE-A5DE-01	3.5093
TCGA-A8-A076-01	3.81789
TCGA-A2-A3XZ-01	3.80923
TCGA-AR-A256-01	3.66634
TCGA-BH-A0DG-01	3.75747
TCGA-C8-A26Z-01	4.06041
TCGA-BH-A0HW-01	4.05523
TCGA-A1-A0SD-01	3.7614
TCGA-A2-A0CX-01	3.58173
TCGA-AO-A03R-01	4.2421
TCGA-PL-A8LZ-01	3.0258
TCGA-BH-A1F8-01	3.80736
TCGA-BH-A0BZ-01	3.60739
TCGA-AC-A8OP-01	4.01835
TCGA-GI-A2C9-01	3.69159
TCGA-AO-A125-01	4.29335
TCGA-EW-A1OZ-01	3.79822
TCGA-BH-A0C0-01	3.18793
TCGA-AN-A03Y-01	3.81304
TCGA-D8-A145-01	3.71074
TCGA-OL-A66I-01	3.33315
TCGA-OL-A5S0-01	3.40138
TCGA-B6-A0I5-01	3.97928
TCGA-Z7-A8R6-01	3.8084
TCGA-LD-A9QF-01	3.60373
TCGA-C8-A134-01	3.38609
TCGA-AN-A0XT-01	3.82245
TCGA-BH-A0HA-01	3.7349
TCGA-AR-A251-01	3.61251
TCGA-C8-A26V-01	3.70979
TCGA-OL-A5D7-01	3.32427
TCGA-E2-A1IU-01	3.74741
TCGA-AN-A0XO-01	3.99095
TCGA-AN-A0AR-01	3.6706
TCGA-E2-A1IO-01	3.60109
TCGA-D8-A27H-01	4.084
TCGA-A7-A56D-01	4.0384
TCGA-GM-A3XL-01	3.35518
TCGA-BH-A0DX-01	3.75979
TCGA-A2-A4RX-01	3.35204
TCGA-B6-A0X1-01	3.37823
TCGA-S3-AA0Z-01	3.3768
TCGA-BH-A1FH-01	3.63105
TCGA-AR-A24W-01	3.83663
TCGA-A8-A06T-01	3.58031
TCGA-B6-A0RM-01	3.74838
TCGA-A2-A04N-01	3.74288
TCGA-E9-A226-01	3.57467
TCGA-BH-A0BJ-01	3.67685
TCGA-E2-A10C-01	3.89433
TCGA-BH-A5IZ-01	3.68267
TCGA-E9-A1RD-01	3.75583
TCGA-AC-A5XU-01	3.77062
TCGA-E2-A576-01	3.99518
TCGA-E9-A295-01	3.78458
TCGA-LD-A74U-01	3.72294
TCGA-E2-A570-01	3.70831
TCGA-E9-A1NF-01	3.78931
TCGA-E9-A1R4-01	3.45135
TCGA-B6-A409-01	3.90577
TCGA-EW-A423-01	4.09559
TCGA-OL-A6VO-01	3.27197
TCGA-EW-A6SD-01	3.73994
TCGA-GM-A2DH-01	3.30696
TCGA-LL-A5YM-01	4.14659
TCGA-BH-A0H6-01	3.72825
TCGA-E9-A1N8-01	3.73344
TCGA-AR-A24Z-01	3.57801
TCGA-A7-A4SD-01	3.19972
TCGA-AR-A0U0-01	3.27336
TCGA-BH-A203-01	3.73323
TCGA-E2-A1IK-01	3.82053
TCGA-D8-A13Y-01	3.89331
TCGA-AR-A1AX-01	3.28936
TCGA-E9-A1N9-01	3.69487
TCGA-C8-A1HN-01	3.8777
TCGA-A2-A0YC-01	3.76889
TCGA-A2-A0CL-01	2.99344
TCGA-D8-A1JA-01	3.91591
TCGA-D8-A1XM-01	3.51391
TCGA-A2-A04X-01	3.77616
TCGA-AO-A12A-01	3.46818
TCGA-E2-A1BC-01	3.75808
TCGA-A2-A25F-01	3.03914
TCGA-EW-A2FV-01	3.69467
TCGA-C8-A132-01	3.39846
TCGA-AN-A0AT-01	3.46286
TCGA-AC-A3QP-01	3.68538
TCGA-E9-A1R6-01	3.79618
TCGA-C8-A27B-01	3.36565
TCGA-E2-A14P-01	3.80009
TCGA-LL-A7SZ-01	3.94161
TCGA-BH-A0BO-01	3.68127
TCGA-BH-A0HX-01	3.66195
TCGA-A1-A0SF-01	3.84946
TCGA-BH-A0B9-01	3.2977
TCGA-D8-A1JG-01	3.5634
TCGA-D8-A1JN-01	4.21195
TCGA-A8-A06Z-01	4.0117
TCGA-A2-A0YD-01	3.76342
TCGA-D8-A1JB-01	3.53001
TCGA-JL-A3YX-01	3.82673
TCGA-A1-A0SK-01	3.50971
TCGA-AO-A03P-01	3.8565
TCGA-E2-A1LA-01	3.98784
TCGA-AN-A0FJ-01	3.23196
TCGA-LL-A7T0-01	3.4592
TCGA-D8-A141-01	3.27929
TCGA-BH-A0HB-01	3.78403
TCGA-C8-A12Z-01	3.9446
TCGA-A8-A08S-01	3.62299
TCGA-S3-AA10-01	3.36498
TCGA-E9-A22G-01	3.73113
TCGA-C8-A1HE-01	3.89924
TCGA-E2-A2P5-01	3.58066
TCGA-AO-A0J9-01	4.09497
TCGA-AR-A1AK-01	3.60663
TCGA-C8-A27A-01	3.47641
TCGA-E9-A5UP-01	4.10131
TCGA-A2-A0T2-01	3.93905
TCGA-BH-A0C3-01	3.66056
TCGA-E2-A1IG-01	3.59317
TCGA-C8-A1HL-01	4.02147
TCGA-BH-A208-01	3.97689
TCGA-A2-A3KD-01	3.97078
TCGA-A2-A0YK-01	3.5119
TCGA-BH-A1FR-01	3.6654
TCGA-BH-A18J-01	3.79294
TCGA-B6-A0WY-01	3.36545
TCGA-AR-A24M-01	3.53514
TCGA-E9-A1NI-01	3.86057
TCGA-A8-A093-01	3.98525
TCGA-AC-A6NO-01	3.80165
TCGA-A8-A09M-01	3.88927
TCGA-EW-A1OV-01	3.46528
TCGA-C8-A278-01	3.51908
TCGA-AR-A1AP-01	3.88468
TCGA-E2-A1LS-01	4.5409
TCGA-A8-A09G-01	3.9138
TCGA-A8-A09R-01	3.79183
TCGA-GM-A5PX-01	3.86707
TCGA-E2-A1BD-01	3.97451
TCGA-E9-A1R2-01	3.72707
TCGA-AC-A62Y-01	3.91039
TCGA-AC-A2FO-01	3.69561
TCGA-AR-A1AY-01	3.57435
TCGA-AR-A2LN-01	3.65558
TCGA-D8-A27W-01	3.78873
TCGA-OL-A66O-01	3.83601
TCGA-BH-A0HU-01	3.90533
TCGA-AR-A1AH-01	3.5674
TCGA-A8-A081-01	3.70305
TCGA-C8-A8HQ-01	3.78068
TCGA-A2-A04Y-01	3.98066
TCGA-GM-A2DB-01	3.8409
TCGA-E9-A3Q9-01	4.04152
TCGA-A8-A09I-01	3.62119
TCGA-A8-A07L-01	3.53278
TCGA-A2-A3XV-01	3.97755
TCGA-AR-A0TY-01	3.83971
TCGA-LL-A6FR-01	3.92375
TCGA-A2-A0CW-01	3.70154
TCGA-E2-A14O-01	4.04417
TCGA-D8-A1J9-01	3.75049
TCGA-A2-A0CQ-01	4.18594
TCGA-A8-A08Z-01	3.47851
TCGA-AC-A2FE-01	3.53908
TCGA-AO-A03N-01	4.41507
TCGA-EW-A2FW-01	3.90069
TCGA-AR-A2LL-01	3.86995
TCGA-AR-A24Q-01	3.70763
TCGA-AO-A0J3-01	4.02839
TCGA-AR-A2LK-01	3.44003
TCGA-A8-A08J-01	3.92005
TCGA-A2-A0YF-01	3.63988
TCGA-BH-A0AZ-01	3.81799
TCGA-E9-A22B-01	3.93043
TCGA-AC-A3W5-01	3.75973
TCGA-BH-A0C1-01	3.72847
TCGA-AN-A0XU-01	3.36182
TCGA-B6-A0RQ-01	3.66969
TCGA-D8-A1JL-01	3.08725
TCGA-D8-A1Y0-01	3.60122
TCGA-E9-A229-01	3.31722
TCGA-A8-A07I-01	3.66746
TCGA-OL-A5RU-01	3.68036
TCGA-AR-A5QP-01	3.70444
TCGA-D8-A1XZ-01	3.30074
TCGA-EW-A1PC-01	3.50264
TCGA-AO-A0J2-01	3.62162
TCGA-E2-A1LB-01	3.77552
TCGA-5T-A9QA-01	4.0175
TCGA-B6-A40C-01	3.95662
TCGA-A7-A0CH-01	3.90082
TCGA-E2-A9RU-01	4.01905
TCGA-A2-A0D2-01	3.23345
TCGA-BH-A1FE-06	3.53098
TCGA-AC-A8OR-01	3.78884
TCGA-S3-A6ZH-01	3.82205
TCGA-E2-A14Z-01	3.3662
TCGA-E2-A1IF-01	4.06202
TCGA-D8-A27G-01	3.51839
TCGA-EW-A1PH-01	3.7115
TCGA-E2-A14Y-01	3.66511
TCGA-WT-AB41-01	3.76795
TCGA-AO-A1KQ-01	3.7541
TCGA-D8-A1JU-01	3.53678
TCGA-BH-A0DL-01	3.32944
TCGA-E2-A56Z-01	3.88288
TCGA-A7-A0D9-01	3.78782
TCGA-BH-A0DO-01	3.92512
TCGA-A2-A259-01	3.53786
TCGA-AN-A0XP-01	3.97433
TCGA-BH-A202-01	3.53644
TCGA-A2-A0YJ-01	3.76752
TCGA-B6-A0RH-01	3.85274
TCGA-D8-A1XD-01	3.84683
TCGA-A2-A0T7-01	3.50422
TCGA-AC-A2FG-01	3.85445
TCGA-BH-AB28-01	3.69633
TCGA-B6-A0RE-01	3.72399
TCGA-D8-A1JP-01	3.50168
TCGA-S3-A6ZF-01	3.50027
TCGA-AC-A3YJ-01	3.68227
TCGA-A2-A0YI-01	3.55726
TCGA-AN-A04C-01	4.0059
TCGA-B6-A0RO-01	3.74162
TCGA-A2-A0SX-01	3.71886
TCGA-E2-A14R-01	3.83984
TCGA-A7-A0DB-01	4.00813
TCGA-EW-A1OX-01	3.90586
TCGA-A7-A26F-01	3.60777
TCGA-AC-A2QH-01	3.60688
TCGA-AO-A1KR-01	3.80661
TCGA-BH-A1ES-01	3.76506
TCGA-B6-A0IE-01	4.06429
TCGA-EW-A1P5-01	3.49176
TCGA-E9-A5UO-01	4.03865
TCGA-HN-A2NL-01	3.32654
TCGA-GM-A2DN-01	3.72979
TCGA-C8-A12V-01	2.92516
TCGA-EW-A1J2-01	3.65668
TCGA-AR-A1AR-01	3.14113
TCGA-PL-A8LV-01	4.22638
TCGA-D8-A1JF-01	3.82763
TCGA-AC-A23E-01	3.5555
TCGA-BH-A0DH-01	3.90807
TCGA-C8-A12Y-01	3.74552
TCGA-BH-A0BG-01	3.39166
TCGA-BH-A18H-01	3.85689
TCGA-D8-A1JD-01	3.52989
TCGA-E9-A228-01	3.72963
TCGA-E9-A3HO-01	4.02044
TCGA-A2-A0EV-01	3.70589
TCGA-BH-A0EI-01	3.70348
TCGA-AN-A0XW-01	3.66252
TCGA-A8-A09A-01	3.78523
TCGA-A1-A0SG-01	3.84025
TCGA-BH-A1F6-01	3.72946
TCGA-E9-A249-01	3.63439
TCGA-BH-A1F2-01	3.98055
TCGA-A8-A096-01	3.52263
TCGA-AR-A1AI-01	3.08346
TCGA-AC-A3BB-01	3.69884
TCGA-BH-A0WA-01	3.48344
TCGA-AQ-A1H3-01	3.7087
TCGA-BH-A0E7-01	3.86527
TCGA-BH-A0RX-01	3.4337
TCGA-AO-A03U-01	3.58934
TCGA-AR-A24L-01	3.63175
TCGA-E2-A1IJ-01	3.74905
TCGA-E2-A150-01	3.80573
TCGA-E2-A15H-01	3.74413
TCGA-BH-A0E0-01	3.86065
TCGA-A2-A0D1-01	4.01659
TCGA-A8-A09D-01	3.74212
TCGA-AQ-A1H2-01	3.71157
TCGA-D8-A1JH-01	3.36759
TCGA-GM-A3NW-01	4.07117
TCGA-A7-A0CD-01	3.91709
TCGA-A7-A2KD-01	3.50498
TCGA-AO-A03L-01	3.4553
TCGA-AR-A2LR-01	3.59112
TCGA-E2-A14T-01	3.90261
TCGA-AR-A24U-01	3.51865
TCGA-BH-A28Q-01	3.67405
TCGA-C8-A3M7-01	3.8774
TCGA-BH-A0EE-01	3.78998
TCGA-3C-AALK-01	3.85981
TCGA-EW-A1OW-01	3.29812
TCGA-E2-A108-01	3.31884
TCGA-A2-A0D4-01	3.92844
TCGA-E9-A1RA-01	3.50358
TCGA-V7-A7HQ-01	3.95374
TCGA-AR-A24X-01	3.6334
TCGA-D8-A73X-01	3.85432
TCGA-BH-A0W4-01	3.63536
TCGA-BH-A1ET-01	3.77618
TCGA-BH-A0C7-01	3.70618
TCGA-LD-A7W5-01	3.39796
TCGA-D8-A1XK-01	3.14199
TCGA-A2-A0T4-01	3.68164
TCGA-AN-A0FX-01	3.69015
TCGA-A2-A0D3-01	3.64611
TCGA-D8-A1XS-01	3.65977
TCGA-C8-A138-01	3.73979
TCGA-AR-A24R-01	3.66579
TCGA-BH-A2L8-01	3.10616
TCGA-E2-A14V-01	3.80904
TCGA-AO-A0JE-01	3.41003
TCGA-A8-A06O-01	3.91469
TCGA-AO-A0J4-01	3.66348
TCGA-EW-A1P3-01	4.20779
TCGA-B6-A0WT-01	3.63853
TCGA-C8-A26W-01	3.43786
TCGA-AN-A041-01	3.72646
TCGA-D8-A1Y3-01	3.55661
TCGA-B6-A40B-01	3.91227
TCGA-B6-A1KI-01	4.06712
TCGA-A8-A090-01	3.6372
TCGA-BH-A0B6-01	3.44672
TCGA-A8-A09W-01	3.86567
TCGA-AO-A03M-01	3.41201
TCGA-E2-A1L6-01	3.63596
TCGA-AR-A0TQ-01	3.67652
TCGA-B6-A0RP-01	3.79975
TCGA-AN-A0FK-01	3.87504
TCGA-E9-A22D-01	3.4845
TCGA-BH-A18L-01	3.95036
TCGA-E9-A1RG-01	3.79635
TCGA-D8-A146-01	3.69485
TCGA-AO-A0JL-01	4.29538
TCGA-EW-A6SB-01	3.84033
TCGA-3C-AAAU-01	3.73116
TCGA-GM-A2DF-01	3.91385
TCGA-E2-A15J-01	3.73774
TCGA-EW-A424-01	3.94812
TCGA-A8-A07Z-01	3.7804
TCGA-BH-A0BF-01	3.4515
TCGA-E2-A154-01	3.75413
TCGA-A8-A08T-01	3.86263
TCGA-A8-A085-01	3.97463
TCGA-EW-A1P4-01	3.41887
TCGA-EW-A1J1-01	3.77204
TCGA-A8-A084-01	4.03146
TCGA-E9-A1R7-01	3.82178
TCGA-AO-A0JA-01	3.75352
TCGA-A2-A1G4-01	3.8415
TCGA-C8-A12K-01	3.15456
TCGA-A2-A0CK-01	3.88406
TCGA-A7-A4SE-01	3.46699
TCGA-C8-A274-01	4.08172
TCGA-BH-A0B0-01	3.79166
TCGA-BH-A1EY-01	3.65403
TCGA-C8-A12O-01	3.45022
TCGA-BH-A42U-01	3.75832
TCGA-AQ-A04H-01	3.96088
TCGA-A7-A425-01	3.75056
TCGA-AN-A049-01	3.4826
TCGA-A8-A06Y-01	3.87553
TCGA-AR-A2LE-01	4.14024
TCGA-AC-A23G-01	3.8088
TCGA-A7-A5ZV-01	3.89702
TCGA-BH-A0BL-01	3.26547
TCGA-EW-A1PA-01	3.9098
TCGA-E9-A1RC-01	3.84602
TCGA-A2-A1FV-01	4.08598
TCGA-BH-A0AU-01	3.77913
TCGA-LL-A73Y-01	3.95221
TCGA-D8-A1JC-01	3.67838
TCGA-E2-A1B4-01	3.86752
TCGA-A2-A0EW-01	3.59612
TCGA-E9-A1NG-01	3.53467
TCGA-AR-A1AL-01	3.65587
TCGA-LD-A7W6-01	3.72784
TCGA-JL-A3YW-01	3.86555
TCGA-A2-A1FX-01	3.68389
TCGA-BH-A1FJ-01	3.96827
TCGA-A2-A0EX-01	3.73236
TCGA-A2-A0CM-01	3.22895
TCGA-GM-A2DA-01	4.17249
TCGA-B6-A0X7-01	3.93802
TCGA-AR-A2LQ-01	3.75148
TCGA-W8-A86G-01	4.01183
TCGA-BH-A0HO-01	3.56176
TCGA-BH-A1FU-01	3.3175
TCGA-A8-A091-01	3.88432
TCGA-E9-A1N3-01	3.82526
TCGA-AR-A0U2-01	3.37759
TCGA-BH-A0W7-01	3.56491
TCGA-E9-A1R5-01	3.95789
TCGA-3C-AALI-01	4.00523
TCGA-E9-A1RI-01	3.71535
TCGA-A2-A0ER-01	3.95966
TCGA-3C-AALJ-01	3.8934
TCGA-E9-A6HE-01	3.7101
TCGA-A7-A5ZX-01	3.6915
TCGA-BH-A201-01	3.75006
TCGA-A2-A04W-01	4.33559
TCGA-D8-A73W-01	4.02476
TCGA-A7-A3IY-01	3.58108
TCGA-OL-A6VR-01	3.83631
TCGA-EW-A2FR-01	3.67104
TCGA-BH-A0HP-01	3.80459
TCGA-AR-A0TP-01	3.99617
TCGA-C8-A12X-01	3.82794
TCGA-D8-A1XJ-01	3.72672
TCGA-AR-A0TZ-01	3.63284
TCGA-EW-A1OY-01	3.87857
TCGA-GM-A2DC-01	4.44775
TCGA-BH-A18N-01	3.60899
TCGA-E9-A1ND-01	3.35564
TCGA-D8-A1XR-01	3.81719
TCGA-A2-A0ES-01	3.5586
TCGA-C8-A1HO-01	3.71408
TCGA-LL-A9Q3-01	4.07509
TCGA-A7-A3J1-01	3.64901
TCGA-AC-A5EH-01	3.75149
TCGA-E2-A15O-01	3.78303
TCGA-AC-A3W6-01	3.64669
TCGA-AN-A0FD-01	3.81139
TCGA-BH-A0BM-01	4.12588
TCGA-E9-A22H-01	3.66368
TCGA-EW-A1IY-01	3.42694
TCGA-E9-A3X8-01	4.05796
TCGA-AR-A24K-01	3.82458
TCGA-S3-AA11-01	3.68636
TCGA-EW-A6SA-01	4.00593
TCGA-A2-A0CP-01	3.8906
TCGA-B6-A0RU-01	3.55915
TCGA-B6-A0RS-01	4.04233
TCGA-A1-A0SN-01	3.63566
TCGA-EW-A1IZ-01	3.71392
TCGA-A7-A13F-01	3.8603
TCGA-D8-A1JT-01	3.98063
TCGA-D8-A1JM-01	3.79635
TCGA-BH-A0BQ-01	3.59178
TCGA-BH-A0EA-01	3.62222
TCGA-BH-A0BA-01	3.81193
TCGA-EW-A6SC-01	3.73589
TCGA-OL-A5DA-01	3.65089
TCGA-A2-A0T1-01	3.73391
TCGA-AO-A0JC-01	2.77283
TCGA-EW-A2FS-01	4.0959
TCGA-A8-A09K-01	3.90428
TCGA-E2-A107-01	4.14215
TCGA-A7-A6VY-01	3.47607
TCGA-E2-A14Q-01	3.86693
TCGA-E2-A15A-06	3.28204
TCGA-B6-A0IB-01	4.10978
TCGA-A8-A06Q-01	3.88471
TCGA-GM-A2DK-01	4.07499
TCGA-5L-AAT0-01	3.59465
TCGA-A7-A4SC-01	4.00628
TCGA-A2-A0CR-01	3.59369
TCGA-AC-A2QJ-01	3.58277
TCGA-AN-A03X-01	3.91732
TCGA-AN-A0FL-01	4.13326
TCGA-BH-A18P-01	3.62805
TCGA-AC-A3YI-01	3.79632
TCGA-A2-A0SY-01	3.75985
TCGA-GM-A2DM-01	3.53536
TCGA-D8-A1XF-01	3.93978
TCGA-BH-A1FM-01	4.11156
TCGA-BH-A0HN-01	4.12276
TCGA-AN-A0FV-01	3.79235
TCGA-B6-A0X0-01	3.80336
TCGA-AO-A03T-01	4.31766
TCGA-S3-AA15-01	3.67264
TCGA-AO-A12D-01	3.69535
TCGA-BH-A0DK-01	3.75327
TCGA-AO-A124-01	3.32591
TCGA-E2-A15R-01	3.96017
TCGA-D8-A1Y1-01	3.66846
TCGA-A2-A04T-01	3.58213
TCGA-UU-A93S-01	3.91996
TCGA-A2-A0T6-01	3.65041
TCGA-E2-A10F-01	3.6415
TCGA-EW-A1IW-01	3.64645
TCGA-E9-A1NC-01	3.92468
TCGA-AC-A3TM-01	3.98912
TCGA-E9-A1QZ-01	3.49924
TCGA-A8-A09C-01	3.96906
TCGA-D8-A73U-01	3.68682
TCGA-A8-A07E-01	3.62514
TCGA-AC-A3TN-01	4.18061
TCGA-AO-A0JF-01	3.60436
TCGA-E2-A153-01	3.88962
TCGA-BH-A0B5-01	3.52302
TCGA-A8-A07W-01	3.60541
TCGA-BH-A0B8-01	3.73759
TCGA-BH-A0B1-01	3.84353
TCGA-BH-A1FN-01	3.60456
TCGA-D8-A147-01	3.50406
TCGA-PL-A8LX-01	3.75399
TCGA-E9-A1N4-01	3.39826
TCGA-BH-A18F-01	3.78159
TCGA-D8-A27F-01	3.49157
TCGA-A8-A0AB-01	3.86821
TCGA-AR-A0TS-01	3.36413
TCGA-BH-A0H9-01	3.68986
TCGA-A8-A07U-01	3.62256
TCGA-E2-A14X-01	3.70207
TCGA-C8-A131-01	3.87564
TCGA-BH-A1FL-01	3.82663
TCGA-C8-A12W-01	3.64239
TCGA-AC-A7VC-01	3.29802
TCGA-AO-A12E-01	3.79263
TCGA-E2-A1LI-01	3.63034
TCGA-AC-A2BM-01	3.46304
TCGA-A8-A07R-01	3.59102
TCGA-BH-A0AW-01	3.85613
TCGA-A7-A426-01	3.78777
TCGA-BH-A6R8-01	3.59461
TCGA-AC-A8OS-01	3.8833
TCGA-A2-A04Q-01	3.58317
TCGA-A7-A26H-01	3.78442
TCGA-A7-A4SF-01	3.8708
TCGA-D8-A27M-01	3.57399
TCGA-E9-A1NE-01	3.38226
TCGA-E2-A573-01	3.49067
TCGA-C8-A1HI-01	3.88124
TCGA-A7-A6VW-01	3.60472
TCGA-BH-A0B7-01	3.58706
TCGA-A8-A0A6-01	3.783
TCGA-AO-A0J5-01	3.88571
TCGA-AO-A12H-01	3.88766
TCGA-E2-A15G-01	3.71637
TCGA-GM-A5PV-01	3.83662
TCGA-E9-A24A-01	3.73308
TCGA-AR-A2LM-01	3.58003
TCGA-E2-A1II-01	2.93115
TCGA-D8-A27P-01	3.80852
TCGA-EW-A1J3-01	4.06471
TCGA-B6-A0I8-01	4.27818
TCGA-AO-A1KS-01	3.41019
TCGA-A2-A4S2-01	3.50673
TCGA-BH-A6R9-01	3.27598
TCGA-BH-A8FZ-01	3.60441
TCGA-AC-A2FK-01	3.41153
TCGA-A2-A0T0-01	3.67831
TCGA-A8-A07S-01	4.00754
TCGA-GM-A2DI-01	3.27431
TCGA-E2-A106-01	3.99926
TCGA-BH-A0E6-01	3.7343
TCGA-AO-A03V-01	3.93964
TCGA-AC-A2BK-01	3.57608
TCGA-AR-A254-01	3.60634
TCGA-AO-A129-01	3.72987
TCGA-BH-A8FY-01	4.15998
TCGA-D8-A143-01	3.55053
TCGA-AC-A3W7-01	3.9036
TCGA-A8-A06X-01	3.69961
TCGA-AR-A255-01	3.52964
TCGA-BH-A0DZ-01	3.60776
TCGA-C8-A12T-01	3.56742
TCGA-AO-A12G-01	4.09866
TCGA-E2-A15L-01	3.69862
TCGA-AN-A0FF-01	3.72762
TCGA-A2-A3XX-01	3.57197
TCGA-EW-A1P8-01	3.34154
TCGA-A8-A097-01	3.73595
TCGA-BH-A0E1-01	3.79813
TCGA-BH-A0HF-01	3.65495
TCGA-E9-A5FL-01	3.96093
TCGA-AR-A1AW-01	3.32065
TCGA-AQ-A0Y5-01	3.68462
TCGA-OK-A5Q2-01	3.67639
TCGA-E2-A1B6-01	3.28876
TCGA-A8-A07P-01	3.88997
TCGA-AR-A0TW-01	3.84288
TCGA-E9-A1N6-01	3.45808
TCGA-BH-A1EU-01	3.4839
TCGA-A2-A0EQ-01	3.47909
TCGA-A8-A08C-01	3.62856
TCGA-OL-A5RW-01	4.03227
TCGA-B6-A0WS-01	3.38382
TCGA-BH-A42V-01	3.53157
TCGA-A2-A0YL-01	3.5494
TCGA-B6-A402-01	4.36193
TCGA-A7-A0CJ-01	3.5921
TCGA-E9-A22E-01	3.88271
TCGA-A2-A3Y0-01	3.06709
TCGA-AN-A0FZ-01	3.8588
TCGA-BH-A0DQ-01	3.57518
TCGA-A8-A07J-01	3.37705
TCGA-E9-A54X-01	4.04072
TCGA-B6-A1KC-01	4.14718
TCGA-BH-A18K-01	3.93693
TCGA-A2-A0EU-01	3.72393
TCGA-B6-A0IH-01	3.85508
TCGA-A2-A0EY-01	3.61356
TCGA-AO-A0JJ-01	3.78625
TCGA-C8-A26X-01	3.97935
TCGA-BH-A18Q-01	3.46021
TCGA-A8-A092-01	3.67384
TCGA-S3-AA12-01	3.96254
TCGA-BH-A1EO-01	3.66831
TCGA-A2-A4RW-01	3.67009
TCGA-D8-A142-01	3.74047
TCGA-A2-A0YE-01	3.64059
TCGA-A2-A04P-01	4.00051
TCGA-A2-A0CY-01	3.9062
TCGA-E9-A1RB-01	3.67141
TCGA-A7-A5ZW-01	3.55534
TCGA-E2-A1IN-01	3.94504
TCGA-EW-A6S9-01	3.84055
TCGA-AR-A5QM-01	3.86797
TCGA-AO-A0J7-01	3.88615
TCGA-A2-A3KC-01	3.65872
TCGA-E2-A15D-01	3.49441
TCGA-A2-A0YG-01	3.57143
TCGA-AO-A03O-01	3.49043
TCGA-OL-A66N-01	4.12979
TCGA-B6-A0I2-01	3.65672
TCGA-E2-A572-01	4.02384
TCGA-EW-A1PG-01	3.65104
TCGA-A7-A26G-01	3.5527
TCGA-B6-A0WV-01	3.74517
TCGA-AO-A0JM-01	3.58634
TCGA-D8-A1X7-01	3.70936
TCGA-C8-A3M8-01	4.04756
TCGA-LL-A5YN-01	3.60931
TCGA-B6-A0RG-01	3.83486
TCGA-AC-A3OD-01	4.01135
TCGA-A8-A08O-01	3.69841
TCGA-A8-A07B-01	3.99415
TCGA-A8-A08L-01	3.63515
TCGA-E2-A15I-01	3.52323
TCGA-BH-A0HQ-01	3.89959
TCGA-AR-A24V-01	3.67719
TCGA-EW-A1P1-01	3.55945
TCGA-EW-A3E8-01	3.56978
TCGA-A8-A07O-01	3.27158
TCGA-AN-A04D-01	4.02597
TCGA-E9-A2JT-01	2.92481
TCGA-A2-A4S3-01	3.47539
TCGA-AN-A0AK-01	3.59942
TCGA-AO-A1KO-01	3.88318
TCGA-BH-A1ES-06	4.09482
TCGA-AR-A1AV-01	3.63489
TCGA-A2-A0D0-01	3.46452
TCGA-A7-A13G-01	4.11566
TCGA-AC-A2QI-01	3.77413
TCGA-AC-A2FM-01	3.89647
TCGA-B6-A0X5-01	3.90762
TCGA-C8-A12L-01	3.68899
TCGA-AN-A0AS-01	3.83696
TCGA-A8-A0A2-01	4.05597
TCGA-LQ-A4E4-01	4.13564
TCGA-A1-A0SI-01	3.63183
TCGA-BH-A5J0-01	3.7082
TCGA-D8-A1Y2-01	3.50398
TCGA-A7-A3RF-01	4.03645
TCGA-A2-A0T5-01	3.54293
TCGA-BH-A1F5-01	4.13806
TCGA-LD-A66U-01	3.70813
TCGA-E9-A3QA-01	3.24571
TCGA-AO-A12F-01	3.91484
TCGA-A2-A25E-01	3.61948
TCGA-A8-A0A4-01	3.80909
TCGA-EW-A1J6-01	4.20525
TCGA-C8-A8HR-01	3.55534
TCGA-BH-A0BV-01	3.60161
TCGA-D8-A27T-01	3.52206
TCGA-E9-A1RE-01	3.79407
TCGA-A2-A0T3-01	3.89003
TCGA-E2-A15E-01	3.72262
TCGA-E9-A1N5-01	3.51528
TCGA-B6-A0RV-01	3.45059
TCGA-E2-A15P-01	3.79713
TCGA-AC-A3EH-01	4.09319
TCGA-BH-A1FB-01	3.33104
TCGA-A8-A07C-01	3.35226
TCGA-E9-A5FK-01	3.81676
TCGA-A2-A0CO-01	3.75108
TCGA-A8-A0A9-01	3.70817
TCGA-C8-A1HF-01	3.29969
TCGA-AQ-A54O-01	4.06527
TCGA-S3-AA17-01	3.78883
TCGA-MS-A51U-01	3.8798
TCGA-AC-A62V-01	3.9766
TCGA-GI-A2C8-01	3.81021
TCGA-BH-A18S-01	4.16832
TCGA-EW-A1P7-01	3.32663
TCGA-A8-A08P-01	3.49342
TCGA-A8-A095-01	3.58698
TCGA-EW-A1P0-01	3.89032
TCGA-A2-A4S1-01	3.38329
TCGA-AR-A0U3-01	3.60993
TCGA-BH-A0EB-01	3.61426
TCGA-E9-A54Y-01	4.52995
TCGA-D8-A1XU-01	3.85532
TCGA-OL-A66J-01	3.86671
TCGA-EW-A1PD-01	3.47093
TCGA-BH-A0BC-01	3.65005
TCGA-AC-A23H-01	3.93353
TCGA-D8-A1XC-01	4.00695
TCGA-AN-A0XV-01	3.75924
TCGA-A8-A08G-01	3.84077
TCGA-A2-A1FW-01	3.79723
TCGA-LL-A5YO-01	3.41666
TCGA-E9-A1RF-01	4.00536
TCGA-XX-A899-01	3.40925
TCGA-E2-A15K-06	4.12468
TCGA-AO-A0JI-01	3.90161
TCGA-AN-A0AM-01	3.64206
TCGA-AO-A128-01	2.90268
TCGA-C8-A12N-01	3.54956
TCGA-A7-A6VX-01	3.69825
TCGA-C8-A133-01	3.8594
TCGA-A2-A0CS-01	3.68158
TCGA-E2-A15K-01	3.77753
TCGA-A8-A083-01	3.79203
TCGA-XX-A89A-01	3.59206
TCGA-BH-A28O-01	3.70671
TCGA-B6-A0IC-01	3.8047
TCGA-B6-A401-01	3.869
TCGA-AN-A0XS-01	3.66058
TCGA-A7-A0CG-01	3.68098
TCGA-A1-A0SM-01	3.88217
TCGA-D8-A27R-01	3.55513
TCGA-GM-A2DD-01	3.79791
TCGA-LL-A740-01	3.68667
TCGA-AR-A24T-01	3.58338
TCGA-BH-A0H0-01	4.35638
TCGA-A8-A09T-01	3.60589
TCGA-B6-A0WW-01	3.91605
TCGA-OL-A66L-01	4.01064
TCGA-A8-A0A7-01	3.78374
TCGA-A7-A4SA-01	3.70842
TCGA-A2-A0EN-01	3.79528
TCGA-B6-A0IO-01	3.96774
TCGA-AC-A8OQ-01	3.7216
TCGA-D8-A27E-01	3.86207
TCGA-BH-A8G0-01	3.66124
TCGA-A2-A3XW-01	3.73645
TCGA-BH-A0DP-01	3.72294
TCGA-PE-A5DD-01	3.98754
TCGA-OL-A66K-01	3.8872
TCGA-BH-A1FG-01	4.22272
TCGA-A2-A25D-01	3.72492
TCGA-S3-AA14-01	3.86667
TCGA-LL-A440-01	3.65405
TCGA-A2-A0SW-01	3.95989
TCGA-D8-A1XW-01	3.59474
TCGA-B6-A2IU-01	4.0879
TCGA-GM-A2DO-01	3.39231
TCGA-B6-A0IA-01	4.32563
TCGA-C8-A26Y-01	3.99217
TCGA-AN-A0G0-01	3.47432
TCGA-AO-A0JG-01	3.67126
TCGA-E2-A1LH-01	4.21158
TCGA-AN-A0FY-01	3.7095
TCGA-E2-A1L9-01	3.59714
TCGA-BH-A0W5-01	3.40884
TCGA-AQ-A54N-01	3.72999
TCGA-GM-A3NY-01	4.29989
TCGA-A8-A09E-01	3.72159
TCGA-AR-A0TX-01	3.47864
TCGA-AQ-A04J-01	3.47305
TCGA-AR-A2LJ-01	3.7436
TCGA-OL-A66H-01	3.47237
TCGA-AC-A23C-01	3.69529
TCGA-D8-A1XQ-01	3.37705
TCGA-E2-A156-01	3.57616
TCGA-AC-A6IV-01	3.56071
TCGA-E2-A15E-06	3.7476
TCGA-D8-A1X6-01	3.45581
TCGA-A8-A0AD-01	3.85519
TCGA-A8-A07G-01	3.74234
TCGA-C8-A130-01	3.67437
TCGA-AN-A046-01	3.71939
TCGA-E2-A1AZ-01	2.99585
TCGA-B6-A400-01	3.52694
TCGA-Z7-A8R5-01	3.71368
TCGA-E2-A155-01	4.04201
TCGA-E2-A109-01	3.67061
TCGA-BH-A1EN-01	4.09566
TCGA-AR-A1AQ-01	3.54405
TCGA-E2-A574-01	3.84889
TCGA-A2-A1G0-01	3.73009
TCGA-AC-A4ZE-01	3.99113
TCGA-AR-A24O-01	3.57193
TCGA-BH-A0AV-01	3.61695
TCGA-C8-A137-01	3.70911
TCGA-B6-A0RL-01	4.29398
TCGA-OL-A5RV-01	3.68734
TCGA-B6-A0IM-01	3.48006
TCGA-B6-A0IK-01	3.64952
TCGA-B6-A0WX-01	3.63838
TCGA-AR-A24H-01	3.50997
TCGA-B6-A0IQ-01	3.58266
TCGA-D8-A27N-01	3.55051
TCGA-C8-A275-01	3.8401
TCGA-B6-A0IG-01	4.03685
TCGA-E9-A243-01	3.48506
TCGA-D8-A1JE-01	3.71477
TCGA-E2-A1LE-01	3.62002
TCGA-AC-A6IX-01	3.60138
TCGA-A8-A09Q-01	3.6673
TCGA-AN-A0AL-01	3.61807
TCGA-A2-A4RY-01	3.48624
TCGA-AR-A5QQ-01	3.14611
TCGA-D8-A140-01	3.92652
TCGA-A2-A0YH-01	3.67014
TCGA-B6-A3ZX-01	3.1691
TCGA-A1-A0SE-01	3.77136
TCGA-AR-A1AN-01	3.82039
TCGA-A8-A08R-01	3.45053
TCGA-OL-A5RX-01	3.65073
TCGA-AR-A2LO-01	3.48149
TCGA-BH-A0BD-01	3.70669
TCGA-AR-A24N-01	3.77874
TCGA-AR-A2LH-01	3.32695
TCGA-AR-A1AO-01	3.26766
TCGA-BH-A1EW-01	3.48527
TCGA-BH-A0W3-01	3.90906
TCGA-EW-A1PF-01	3.61545
TCGA-S3-A6ZG-01	3.64816
TCGA-E9-A22A-01	3.85429
TCGA-A2-A0YT-01	3.56592
TCGA-B6-A0IN-01	4.2551
TCGA-C8-A1HJ-01	3.76284
TCGA-AQ-A7U7-01	3.41543
TCGA-D8-A1JI-01	3.85866
TCGA-GM-A2D9-01	4.04901
TCGA-A8-A06R-01	3.78052
TCGA-AR-A1AT-01	3.59542
TCGA-AO-A1KP-01	4.2075
TCGA-AN-A0AJ-01	3.26233
TCGA-A8-A07F-01	3.36132
TCGA-GM-A3XG-01	3.7014
TCGA-AR-A0TV-01	3.77167
TCGA-A2-A3XY-01	3.38412
TCGA-BH-A0DD-01	3.47543
TCGA-A2-A1FZ-01	3.53821
TCGA-D8-A13Z-01	3.6908
TCGA-A2-A25C-01	3.45293
TCGA-AN-A0XR-01	3.89923
TCGA-B6-A0RN-01	3.99679
TCGA-AC-A2FB-01	3.43631
TCGA-AC-A7VB-01	3.91258
TCGA-A2-A0YM-01	3.25451
TCGA-OL-A5D8-01	3.83189
TCGA-D8-A1XL-01	3.40694
TCGA-AR-A252-01	3.22304
TCGA-BH-A18G-01	4.05246
TCGA-OL-A5D6-01	3.92383
TCGA-A8-A086-01	3.73218
