# Supplementary material for: Identification of immunological and prognostic value of SHROOM2 in pan-cancer and experimental verification of its role in promoting malignant phenotypes in breast cancer
Source: PeerJ. 2025 Sep 25;13:e20051. doi: 10.7717/peerj.20051 (PMC12476865; doi:10.7717/peerj.20051)
Supplement: Supplemental Information 38 [file peerj-13-20051-s038.xlsx]

## Sheet: MCF7
Sample Name	kits	18s（ct)	SHROOM2（ct)
Ctrl	1	15.267	32.158	16.891		17.1323	-0.24133		1.18208
Ctrl	2	15.127	32.626	17.499			0.36667		0.775571
Ctrl	3	15.143	32.15	17.007			-0.12533		1.09076
SHROOM-KD	1	13.913	32.507	18.594			1.46167		0.363073
SHROOM-KD	2	13.908	32.459	18.551			1.41867		0.374057
SHROOM-KD	3	13.636	32.661	19.025			1.89267		0.269308

## Sheet: MDA-MB-231
Sample Name	kits	18s（ct)	SHROOM2（ct)
Ctrl	1	15.45	36.248	20.798		20.5643	0.23367		0.850469
Ctrl	2	15.46	36.12	20.66			0.09567		0.935838
Ctrl	3	15.231	35.466	20.235			-0.32933		1.25643
SHROOM-KD	1	14.2	37.89	23.69			3.12567		0.114572
SHROOM-KD	2	14.074	36.354	22.28			1.71567		0.304461
SHROOM-KD	3	14.117	36.985	22.868			2.30367		0.202547
