# Supplementary material for: Identification of immunological and prognostic value of SHROOM2 in pan-cancer and experimental verification of its role in promoting malignant phenotypes in breast cancer
Source: PeerJ. 2025 Sep 25;13:e20051. doi: 10.7717/peerj.20051 (PMC12476865; doi:10.7717/peerj.20051)
Supplement: Supplemental Information 39 [file peerj-13-20051-s039.xlsx]

## Sheet: Sheet1
Time(hours)	Ctrl					SHROOM2-KD
0	0	0	0	0	0	0	0	0	0	0
24	1.405	1.43	1.389	1.336	1.318	1.143	1.208	1.215	1.046	1.156
48	2.01	2.127	2.045	2.033	2.181	1.557	1.689	1.463	1.703	1.677
72	3.036	3.07	3.004	3.109	3.058	2.088	2.068	2.078	2.107	2.132
