# Supplementary material for: Identification of immunological and prognostic value of SHROOM2 in pan-cancer and experimental verification of its role in promoting malignant phenotypes in breast cancer
Source: PeerJ. 2025 Sep 25;13:e20051. doi: 10.7717/peerj.20051 (PMC12476865; doi:10.7717/peerj.20051)
Supplement: Supplemental Information 41 [file peerj-13-20051-s041.xlsx]

## Sheet: migration
migration	Ctrl	SHROOM2-KD
1	450	360
2	425	341
3	467	375

## Sheet: invasion
invasion	Ctrl	SHROOM2-KD
1	398	126
2	383	90
3	378	105
