# Supplementary material for: Identification of immunological and prognostic value of SHROOM2 in pan-cancer and experimental verification of its role in promoting malignant phenotypes in breast cancer
Source: PeerJ. 2025 Sep 25;13:e20051. doi: 10.7717/peerj.20051 (PMC12476865; doi:10.7717/peerj.20051)
Supplement: Supplemental Information 42 [file peerj-13-20051-s042.xlsx]

## Sheet: migration
migration	Ctrl	SHROOM2-KD
1	321	155
2	300	140
3	312	136

## Sheet: invasion
invasion	Ctrl	SHROOM2-KD
1	275	132
2	254	118
3	288	125
