# Supplementary material for: Identification of immunological and prognostic value of SHROOM2 in pan-cancer and experimental verification of its role in promoting malignant phenotypes in breast cancer
Source: PeerJ. 2025 Sep 25;13:e20051. doi: 10.7717/peerj.20051 (PMC12476865; doi:10.7717/peerj.20051)
Supplement: Supplemental Information 43 [file peerj-13-20051-s043.xlsx]

## Sheet: Sheet1
Healing Percentage(%)	Ctrl	SHROOM2-KD
1	48.9	25.7
2	51.2	24.3
3	46.6	22.5
