# Supplementary material for: Identification of immunological and prognostic value of SHROOM2 in pan-cancer and experimental verification of its role in promoting malignant phenotypes in breast cancer
Source: PeerJ. 2025 Sep 25;13:e20051. doi: 10.7717/peerj.20051 (PMC12476865; doi:10.7717/peerj.20051)
Supplement: Supplemental Information 44 [file peerj-13-20051-s044.xlsx]

## Sheet: Sheet1
Healing percentage(%)	Ctrl	SHROOM2-KD
1	57.3	29.3
2	64.3	21.7
3	49.8	32.4
